# Supplementary material for: Spiro thiochromene–oxindoles as novel anti-inflammatory agents: design, sustainable synthesis, in vitro and in silico evaluations
Source: Royal Society of Chemistry journal article supplement (doi:10.1039/d4ra07990f), 2025-01-01
Supplement: d4ra07990f1.pdf [file d4ra07990f1.pdf]

## Spiro Thiochromene-Oxindoles as novel Anti-Inflammatory Agents: Design, sustainable synthesis, in-vitro and in-silico evaluations.

Manju<sup>a</sup>, Ashok Kumar Raigar<sup>a</sup>, Kamlesh Saini<sup>a</sup>, Nirmal Jyoti<sup>a</sup>, Ravi Kumar Kapavarapu<sup>b</sup>,  
Anjali Guleria<sup>a,\*</sup>

<sup>a</sup>Department of Chemistry, University of Rajasthan, Jaipur-302004, Rajasthan, India

<sup>b</sup>Department of Pharmaceutical Chemistry and Phytochemistry, Nirmala College of Pharmacy, Atmakur, Mangalgiri, Andhra Pradesh, India

\*E-mail: [dranjliguleria@uniraj.ac.in](mailto:dranjliguleria@uniraj.ac.in); Tel: +91 7073045824

### Supporting Information

| Table of Content                                                                                | Page No |
|-------------------------------------------------------------------------------------------------|---------|
| Chemistry: General Information                                                                  | 1       |
| General procedure for the synthesis of intermediate 2'                                          | 1       |
| General procedure for the synthesis of compounds 4 (a-1)                                        | 2       |
| Generalization of protocol, reaction conditions, and physical properties of compounds 4 (a-1)   | 7       |
| <i>In-vitro</i> anti-inflammatory activity                                                      | 9       |
| <i>In silico</i> studies for the anti-inflammatory activity: Molecular docking studies          | 10      |
| <i>In silico</i> studies for the anti-inflammatory activity: ADMET studies                      | 13      |
| <sup>1</sup> H NMR, <sup>13</sup> C NMR, Mass Spectra, and HPLC traces of synthesized compounds | 14      |
| References                                                                                      | 54      |

### Chemistry

#### General information

All 1,3-diketones, isatin/5-Bromoisatin, and 2-naphthalenethiol were procured from commercial suppliers and used without further purification. The progress of the reaction was monitored by Thin Layer Chromatography (TLC) on Merck-made silica gel 60-F-254 aluminum plates. <sup>1</sup>H and <sup>13</sup>C NMR spectra were recorded on a Jeol resonance -400 instrument using DMSO-d<sub>6</sub> as solvent and a Bruker resonance-500 instrument using CDCl<sub>3</sub> as solvent. The melting points were determined in open capillary tubes and were uncorrected. FTIR spectra were recorded using a KBr disc on a Bruker ALPHA analyzer. Mass spectra were recorded on a Xevo G2-S Q Tof (waters, USA) Mass spectrometer (direct mass ESI-APCI). The purity of all final compounds (≥95%) was established by High Performance Liquid Chromatography (HPLC).

#### General procedure for the synthesis of intermediate 2'

In a 25 mL round-bottomed flask, a mixture of Isatin (1.0 mmol) and 2-naphthalenethiol (1.0 mmol) was refluxed using water as the solvent (5 mL) for 4 hours. The progression of the reaction was monitored by TLC (Ethylacetate/hexane 2:8). After completion of the reaction,

10 mL water was added, and the solid product was isolated by filtration. Subsequently, the product was washed with water many times and dried.

### 3-Hydroxy-3-(2-mercaptanaphthalen-1-yl)indolin-2-one (2')

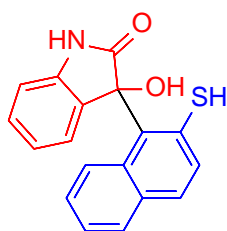

The title compound was prepared following the general procedure using Isatin (1.0 mmol, 0.1470 g), 2-naphthalenethiol (1.0 mmol, 0.1602g), and providing a cream color solid. Yield: 0.2895g, 94%;  $R_f = 0.680$  (Ethylacetate/hexane 2:8) M.P.: 150-152°C  $^1\text{H-NMR}$  (400 MHz,  $\text{CDCl}_3$  /TMS,  $\delta$  PPM): 6.99-8.43 ( m, -NH, 10H aromatic hydrogens), 4.88 (s, 1H), 4.34 (s, 1H);  $^{13}\text{C}$  { $^1\text{H}$ } NMR (400 MHz,  $\text{CDCl}_3$ ):  $\delta$  170.8 147.9 136.8 132.6 130.6 129.7 128.8 127.7 126.4 125.1 124.6 123.9 120.4 112.5 109.5 85.2; HRMS (ESI)  $m/z$  :[M+H] $^+$  calcd for  $\text{C}_{18}\text{H}_{13}\text{NO}_2\text{S}+\text{H}^+$  308.0701 found 308.0712.

### General procedure for the synthesis of compounds 4 (a-l)

In a 25 mL round-bottomed flask, a mixture of Isatin/5-bromoisatin (1.0 mmol), 2-naphthalenethiol (1.0 mmol), and 1,3-diketones (1.0 mmol) was refluxed using water as the solvent (5mL) for the indicated time. The progression of the reaction was monitored by TLC (Ethylacetate/hexane 2:8). After completion of the reaction, an additional 10 mL of water was added, and the solid product was isolated by filtration. Subsequently, the product was washed with water many times. The pure product (racemic mixture) was thus, obtained after drying and did not require further purification steps or the addition of any organic solvent.

### 5'-Bromo-9,9-dimethyl-9,10-dihydrospiro[benzo[a]thioxanthene-12,3'-indoline]-2',11(8H)-dione (4a)

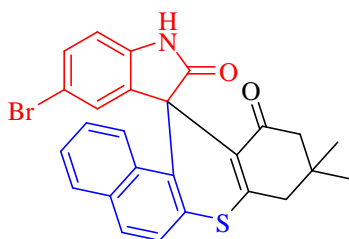

The title compound was prepared following the general procedure using 5-bromoisatin (1.0 mmol, 0.1470 g), 2-naphthalenethiol (1.0 mmol, 0.1602g), and dimedone (1.0 mmol, 0.1400g) providing cream color solid. Yield: 0.4508g, 92%;  $R_f = 0.706$  (Ethylacetate/hexane 2:8) M.P.: 160-162°C IR ( $\nu$   $\text{cm}^{-1}$  KBr): 1716 (C=O group), 1582 (-CONH group), 1242 ( C-S-C cyclic thioether )  $^1\text{H-NMR}$  (400 MHz,  $\text{CDCl}_3$  /TMS,  $\delta$  PPM): 6.73-7.99 ( m, -NH, 9H aromatic hydrogens), 2.46-2.57 (s, 2H), 2.15-2.27 (s, 2H), 1.06-1.12(s, 6H);  $^{13}\text{C}$  { $^1\text{H}$ } NMR (400 MHz,  $\text{CDCl}_3$ ):  $\delta$  195.6 178.5 164.0 141.6 135.7 134.4 133.6 132.6 129.1 127.9 127.6 126.8 126.7 125.8 125.6 114.5 113.3 110.9 51.0 45.9 41.3 32.1 28.8 27.6; HRMS (ESI)  $m/z$  :[M+H] $^+$  calcd for  $\text{C}_{26}\text{H}_{20}\text{BrNO}_2\text{S}+\text{H}^+$  490.0476 found 490.0484; Found 97.5% purity by HPLC. HPLC Condition: 1260 Infinity II with VWD, Eclipse C18 column, 4.6 x 250 mm, 5 microns,  $\text{CH}_3\text{CN}/\text{H}_2\text{O}$  70:30,  $\lambda = 254$  nm.

**5'-Bromospiro[benzo[5,6]thiochromeno[2,3-d]pyrimidine-12,3'-indoline]-2',9,11(8H,10H)-trione (4b)**

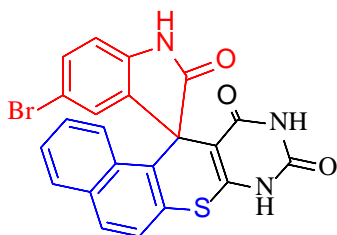

The title compound was prepared following the general procedure using 5-bromoisatin (1.0 mmol, 0.1470 g), 2-naphthalenethiol (1.0 mmol, 0.1602g), and barbituric acid (1.0 mmol, 0.1280g) providing violet color solid. Yield: 0.3918g, 82%;  $R_f = 0.682$  (Ethylacetate/hexane 2:8) M.P.: 124-126°C IR ( $\nu$   $\text{cm}^{-1}$  KBr): 1575 (-CONH group), 1258 (C-S-C cyclic thioether)  $^1\text{H-NMR}$  (500 MHz,  $\text{CDCl}_3$  /TMS,  $\delta$  PPM): 7.44-8.00 (m, 3H, -NH, 10H aromatic hydrogens);  $^{13}\text{C}$  { $^1\text{H}$ } NMR (500 MHz,  $\text{CDCl}_3$ ):  $\delta$  170.9 162.2 150.4 141.9 134.4 133.6 132.6 129.1 127.9 127.6 126.8 126.7 126.3 125.8 118.2 110.5 99.5 58.1; HRMS (ESI)  $m/z$  :[M+H] $^+$  calcd for  $\text{C}_{22}\text{H}_{12}\text{N}_3\text{O}_3\text{S}+\text{H}^+$  477.9861 found 477.9868; Found 100% purity by HPLC. HPLC Condition: 1260 Infinity II with VWD, Eclipse C18 column, 4.6 x 250 mm, 5 microns,  $\text{CH}_3\text{CN}/\text{H}_2\text{O}$  70:30,  $\lambda = 254$  nm.

**5'-Bromo-5-methylspiro[benzo[5,6]thiochromeno[3,2-c]quinoline-7,3'-indoline]-2',6(5H)-dione (4c)**

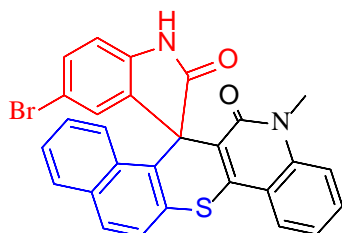

The title compound was prepared following the general procedure using 5-bromoisatin (1.0 mmol, 0.1470 g), 2-naphthalenethiol (1.0 mmol, 0.1602g), and 4-hydroxy-1-methyl-2(1H)-quinolone (1.0 mmol, 0.1751g) providing coral pink color solid. Yield: 0.3902g, 79%;  $R_f = 0.683$ (Ethylacetate/hexane 2:8) M.P.: 174-176°C IR ( $\nu$   $\text{cm}^{-1}$  KBr): 1649 (-CONH group), 1247 (C-S-C cyclic thioether)  $^1\text{H-NMR}$  (500 MHz,  $\text{CDCl}_3$  /TMS,  $\delta$  PPM): 7.45-7.98 (m, -NH, 13H aromatic hydrogens), 3.57 (s, 3H);  $^{13}\text{C}$  { $^1\text{H}$ } NMR (500 MHz,  $\text{CDCl}_3$ ):  $\delta$  184.7 160.4 149.4 141.0 135.6 133.6 129.1 127.9 127.6 126.8 126.7 126.4 113.6 108.3 68.0 28.4; HRMS (ESI)  $m/z$  :[M+H] $^+$  calcd for  $\text{C}_{28}\text{H}_{17}\text{BrN}_2\text{O}_2\text{S}+\text{H}^+$  525.0272 found 525.0278; Found 100% purity by HPLC. HPLC Condition: 1260 Infinity II with VWD, Eclipse C18 column, 4.6 x 250 mm, 5 microns,  $\text{CH}_3\text{CN}/\text{H}_2\text{O}$  70:30,  $\lambda = 254$  nm.

**5'-Bromo-12H-spiro[benzo[f]indeno[1,2-b]thiochromene-13,3'-indoline]-2',12-dione (4d)**

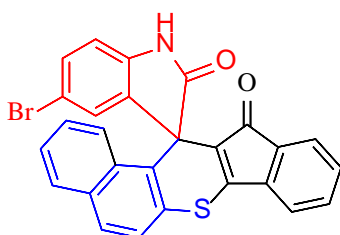

The title compound was prepared following the general procedure using 5-bromoisatin (1.0 mmol, 0.1470 g), 2-naphthalenethiol (1.0 mmol, 0.1602g), and 1,3-indanedione (1.0 mmol, 0.1461g) providing dark brown color solid. Yield: 0.4364g, 88%;  $R_f = 0.703$

(Ethylacetate/hexane 2:8) M.P.: 162-164°C IR ( $\nu$   $\text{cm}^{-1}$  KBr): 1722 (C=O group) 1674 (-CONH group), 1223 (C-S-C cyclic thioether)  $^1\text{H-NMR}$  (500 MHz,  $\text{CDCl}_3$  /TMS,  $\delta$  PPM): 7.41-7.99 (m, -NH, 13H aromatic hydrogens);  $^{13}\text{C}$  { $^1\text{H}$ } NMR (500 MHz,  $\text{CDCl}_3$ ):  $\delta$  186.4 172.6 154.1 140.9 134.4 133.6 133.2 129.1 128.0 127.9 127.6 127.3 126.8 126.7 125.8 113.8 46.1; HRMS (ESI)  $m/z$  :[M+H] $^+$  calcd for  $\text{C}_{27}\text{H}_{14}\text{BrNO}_2\text{S}+\text{H}^+$  496.0007 found 496.0015; Found 100% purity by HPLC. HPLC Condition: 1260 Infinity II with VWD, Eclipse C18 column, 4.6 x 250 mm, 5 microns,  $\text{CH}_3\text{CN}/\text{H}_2\text{O}$  70:30,  $\lambda = 254$  nm.

#### 5'-Bromo-9,10-dihydrospiro[benzo[a]thioxanthene-12,3'-indoline]-2',11(8H)-dione (4e)

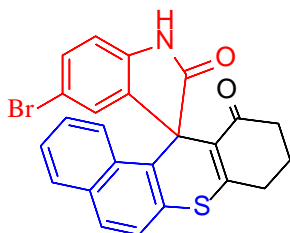

The title compound was prepared following the general procedure using 5-bromoisatin (1.0 mmol, 0.1470 g), 2-naphthalenethiol (1.0 mmol, 0.1602g), and 1,3-cyclohexanedione (1.0 mmol, 0.1120g) providing off-white color solid. Yield: 0.3334g, 72%;  $R_f = 0.683$  (Ethylacetate/hexane 2:8) M.P.: 114-116°C IR ( $\nu$   $\text{cm}^{-1}$  KBr): 1719 (C=O group) 1657 (-CONH group), 1246 (C-S-C cyclic thioether)  $^1\text{H-NMR}$  (500 MHz,  $\text{CDCl}_3$  /TMS,  $\delta$  PPM): 7.45-7.98 (m, -NH, 9H aromatic hydrogens), 3.69 (2H) 2.74 (2H) 1.25 (2H);  $^{13}\text{C}$  { $^1\text{H}$ } NMR (500 MHz,  $\text{CDCl}_3$ ):  $\delta$  195.4 180.3 162.5 155.5 140.9 137.1 134.4 133.6 132.6 129.8 129.1 127.9 127.6 126.8 126.7 126.3 125.8 119.3 115.1 106.0 44.1 28.2 26.7 18.5; HRMS (ESI)  $m/z$  :[M+H] $^+$  calcd for  $\text{C}_{24}\text{H}_{16}\text{BrNO}_2\text{S}+\text{H}^+$  463.0242 found 463.0250; Found 99.5% purity by HPLC. HPLC Condition: 1260 Infinity II with VWD, Eclipse C18 column, 4.6 x 250 mm, 5 microns,  $\text{CH}_3\text{CN}/\text{H}_2\text{O}$  70:30,  $\lambda = 254$  nm.

#### 5'-Bromo-6H-Spiro [benzo[5,6]thiochromeno[3,2-c]chromene-7,3'-indoline]-2',6-dione (4f)

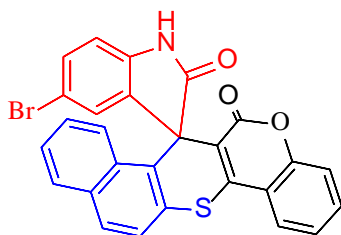

The title compound was prepared following the general procedure using 5-bromoisatin (1.0 mmol, 0.1470 g), 2-naphthalenethiol (1.0 mmol, 0.1602g), and 4-hydroxycoumarin (1.0 mmol, 0.1621g) providing rust brown color solid. Yield: 0.3898g, 76%;  $R_f = 0.706$  (Ethylacetate/hexane 2:8) M.P.: 182-184°C IR ( $\nu$   $\text{cm}^{-1}$  KBr): 1738 (-COO group), 1659 (-CONH group), 1219 (C-O-C cyclic ether)  $^1\text{H-NMR}$  (500 MHz,  $\text{CDCl}_3$  /TMS,  $\delta$  PPM): 7.44-8.00 (m, -NH, 14H aromatic hydrogens);  $^{13}\text{C}$  { $^1\text{H}$ } NMR (500 MHz,  $\text{CDCl}_3$ ):  $\delta$  175.6 164.9 144.3 134.4 133.6 132.6 129.1 127.9 127.6 126.8 126.3 125.8 118.2 117.5 115.0 102.5 64.8 ; HRMS (ESI)  $m/z$  :[M+H] $^+$  calcd for  $\text{C}_{27}\text{H}_{14}\text{BrNO}_3\text{S}+\text{H}^+$  511.9956 found 511.9962; Found 100% purity by HPLC. HPLC Condition: 1260 Infinity II with VWD, Eclipse C18 column, 4.6 x 250 mm, 5 microns,  $\text{CH}_3\text{CN}/\text{H}_2\text{O}$  70:30,  $\lambda = 254$  nm.

**9,9-Dimethyl-9,10-dihydrospiro[benzo[a]thioxanthene-12,3'-indoline]-2',11(8H)-dione (4g)**

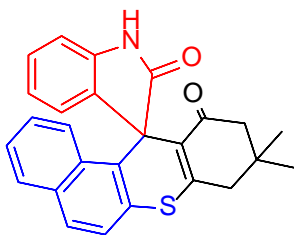

The title compound was prepared following the general procedure using Isatin (1.0 mmol, 0.1470 g), 2-naphthalenethiol (1.0 mmol, 0.1602g), and dimedone (1.0 mmol, 0.1400g) providing cream color solid. Yield: 0.3586g, 87%;  $R_f = 0.707$  (Ethylacetate/hexane 2:8) M.P.: 152-154°C IR ( $\nu$   $\text{cm}^{-1}$  KBr): 1711 (C=O group), 1592 (-CONH group), 1249 (C-S-C cyclic thioether)  $^1\text{H-NMR}$  (400 MHz,  $\text{CDCl}_3$  /TMS,  $\delta$  PPM): 7.42-7.98 (m, -NH, 10H aromatic hydrogens), 3.73 (s, 2H), 2.05 (s, 2H), 1.26(s, 6H);  $^{13}\text{C}$   $\{^1\text{H}\}$  NMR (400 MHz,  $\text{CDCl}_3$ ):  $\delta$  203.2, 182.2 173.8 167.4 134.3 133.5 132.6 129.1 127.9 127.6 126.3 125.7 58.6 48.0 37.2 32.0 29.8; HRMS (ESI)  $m/z$  :[M+H] $^+$  calcd for  $\text{C}_{26}\text{H}_{21}\text{NO}_2\text{S}+\text{H}^+$  412.1371 found 412.1379; Found 100% purity by HPLC. HPLC Condition: 1260 Infinity II with VWD, Eclipse C18 column, 4.6 x 250 mm, 5 microns,  $\text{CH}_3\text{CN}/\text{H}_2\text{O}$  70:30,  $\lambda = 254$  nm.

**Spiro[benzo[5,6]thiochromeno[2,3-d]pyrimidine-12,3'-indoline]-2',9,11(8H,10H)-trione (4h)**

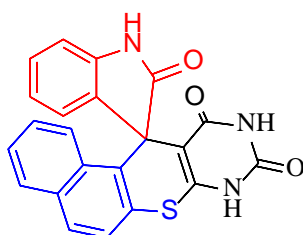

The title compound was prepared following the general procedure using Isatin (1.0 mmol, 0.1470 g), 2-naphthalenethiol (1.0 mmol, 0.1602g), and barbituric acid (1.0 mmol, 0.1280g) providing charcoal gray color solid. Yield: 0.3680g, 92%;  $R_f = 0.680$  (Ethylacetate/hexane 2:8) M.P.: 104-106°C IR ( $\nu$   $\text{cm}^{-1}$  KBr): 1575 (-CONH group), 1258 (C-S-C cyclic thioether)  $^1\text{H-NMR}$  (500 MHz,  $\text{CDCl}_3$  /TMS,  $\delta$  PPM): 7.44-8.00 (m, 3H, -NH, 10H aromatic hydrogens);  $^{13}\text{C}$   $\{^1\text{H}\}$  NMR (500 MHz,  $\text{CDCl}_3$ ):  $\delta$  168.0 159.1 142.9 138.6 134.4 133.6 129.1 128.5 127.6 127.3 126.4 126.1 125.8 60.3; HRMS (ESI)  $m/z$  :[M+H] $^+$  calcd for  $\text{C}_{22}\text{H}_{13}\text{N}_3\text{O}_3\text{S}+\text{H}^+$  400.0756 found 400.0762; Found 99.4% purity by HPLC. HPLC Condition: 1260 Infinity II with VWD, Eclipse C18 column, 4.6 x 250 mm, 5 microns,  $\text{CH}_3\text{CN}/\text{H}_2\text{O}$  70:30,  $\lambda = 254$  nm.

**5-Methylspiro[benzo[5,6]thiochromeno[3,2-c]quinoline-7,3'-indoline]-2',6(5H)-dione (4i)**

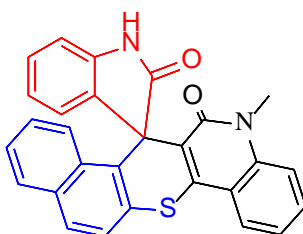

The title compound was prepared following the general procedure using Isatin (1.0 mmol, 0.1470 g), 2-naphthalenethiol (1.0 mmol, 0.1602g), and 4-hydroxy-1-methyl-2(1H)-quinolone (1.0 mmol, 0.1751g) providing beige color solid. Yield: 0.3901g, 87%;  $R_f = 0.705$  (Ethylacetate/hexane 2:8) M.P.: 192-194°C IR ( $\nu$   $\text{cm}^{-1}$  KBr): 1647 (-CONH group), 1252 (C-S-C cyclic thioether)  $^1\text{H-NMR}$  (500 MHz,  $\text{CDCl}_3$  /TMS,  $\delta$  PPM): 7.46-7.98 (m, -NH, 14H aromatic hydrogens), 3.62 (s, 3H);  $^{13}\text{C}$   $\{^1\text{H}\}$  NMR (500 MHz,  $\text{CDCl}_3$ ):  $\delta$  182.4 165.1 153.8

134.2 133.5 132.5 128.9 127.7 127.4 126.7 126.2 125.7 47.8 38.6; HRMS (ESI)  $m/z$  : $[M+H]^+$  calcd for  $C_{22}H_{13}N_3O_3S+H^+$  447.1167 found 447.1171; Found 100% purity by HPLC. HPLC Condition: 1260 Infinity II with VWD, Eclipse C18 column, 4.6 x 250 mm, 5 microns,  $CH_3CN/H_2O$  70:30,  $\lambda = 254$  nm.

**6H-spiro[benzo[5,6]thiochromeno[3,2-c]chromene-7,3'-indoline]-2',6-dione (4j)**

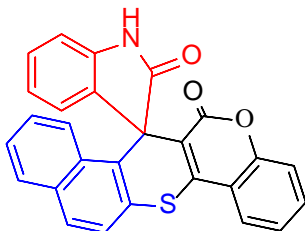

The title compound was prepared following the general procedure using Isatin (1.0 mmol, 0.1470 g), 2-naphthalenethiol (1.0 mmol, 0.1602g), and 4-hydroxycoumarin (1.0 mmol, 0.1621g) providing sand color solid. Yield: 0.3993g, 92%;  $R_f = 0.703$  (Ethylacetate/hexane 2:8) M.P.: 152-154°C IR ( $\nu$   $cm^{-1}$  KBr): 1734 (-COO group), 1652 (-CONH group), 1214 (C-O-C cyclic ether)  $^1H$ -NMR (500 MHz,  $CDCl_3$  /TMS,  $\delta$  PPM): 7.40-7.99 (m, -NH, 14H aromatic hydrogens);  $^{13}C$  { $^1H$ } NMR (500 MHz,  $CDCl_3$ ):  $\delta$  173.0 169.6 140.9 138.3 138.1 134.4 133.6 132.5 129.1 127.9 127.6 126.8 126.7 125.8 113.1 51.1; HRMS (ESI)  $m/z$  : $[M+H]^+$  + calcd for  $C_{27}H_{15}NO_3S+H^+$  434.0851 found 434.0859; Found 100% purity by HPLC. HPLC Condition: 1260 Infinity II with VWD, Eclipse C18 column, 4.6 x 250 mm, 5 microns,  $CH_3CN/H_2O$  70:30,  $\lambda = 254$  nm.

**9,10-Dihydrospiro[benzo[a]thioxanthene-12,3'-indoline]-2',11(8H)-dione (4k)**

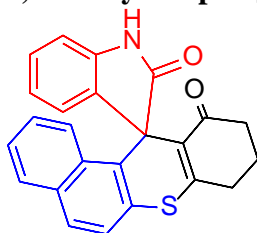

The title compound was prepared following the general procedure using Isatin (1.0 mmol, 0.1470 g), 2-naphthalenethiol (1.0 mmol, 0.1602g), and 1,3-cyclohexanedione (1.0 mmol, 0.1120g) providing black color solid. Yield: 0.3221g, 83%;  $R_f = 0.681$  (Ethylacetate/hexane 2:8) M.P.: 172-174°C IR ( $\nu$   $cm^{-1}$  KBr): 1718 (C=O group) 1654 (-CONH group), 1242 (C-S-C cyclic thioether)  $^1H$ -NMR (500 MHz,  $CDCl_3$  /TMS,  $\delta$  PPM): 7.46-7.99 (m, -NH, 10H aromatic hydrogens), 2.76 (2H) 2.32 (2H) 2.02 (2H);  $^{13}C$  { $^1H$ } NMR (500 MHz,  $CDCl_3$ ):  $\delta$  198.9 166.9 154.2 147.5 134.4 133.6 132.6 129.9 127.9 127.6 126.8 126.7 125.7 52.4 37.3 27.7 20.1; HRMS (ESI)  $m/z$  : $[M+H]^+$  calcd for  $C_{24}H_{17}NO_2S+H^+$  384.1058 found 384.1064; Found 99.03% purity by HPLC. HPLC Condition: 1260 Infinity II with VWD, Eclipse C18 column, 4.6 x 250 mm, 5 microns,  $CH_3CN/H_2O$  70:30,  $\lambda = 254$  nm.

**12H-spiro[benzo[f]indeno[1,2-b]thiochromene-13,3'-indoline]-2',12-dione (4l)**

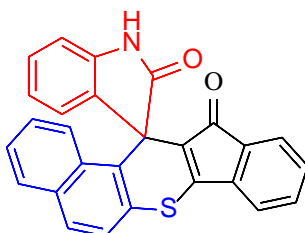

The title compound was prepared following the general procedure using Isatin (1.0 mmol, 0.1470 g), 2-naphthalenethiol (1.0 mmol, 0.1602g), and 1,3-indanedione (1.0 mmol, 0.1461g) providing charcoal color solid. Yield: 0.3762g, 90%;  $R_f = 0.701$  (Ethylacetate/hexane 2:8)

M.P.: 162-164°C IR ( $\nu$   $\text{cm}^{-1}$  KBr): 1716 (C=O group) 1667 (-CONH group), 1216 (C-S-C cyclic thioether)  $^1\text{H-NMR}$  (500 MHz,  $\text{CDCl}_3$  /TMS,  $\delta$  PPM): 6.75-7.92 (m, -NH, 14H aromatic hydrogens);  $^{13}\text{C}$   $\{^1\text{H}\}$  NMR (500 MHz,  $\text{CDCl}_3$ ):  $\delta$  187.9 175.9 160.7 142.5 136.1 136.0 135.7 134.4 133.6 133.2 132.6 129.6 129.1 127.9 127.9 127.6 126.8 126.7 125.8 123.5 123.3 110.3 52.4; HRMS (ESI)  $m/z$  : $[\text{M}+\text{H}]^+$  calcd for  $\text{C}_{27}\text{H}_{15}\text{NO}_2\text{S}+\text{H}^+$  418.0902 found 418.0909; Found 100% purity by HPLC. HPLC Condition: 1260 Infinity II with VWD, Eclipse C18 column, 4.6 x 250 mm, 5 microns,  $\text{CH}_3\text{CN}/\text{H}_2\text{O}$  70:30,  $\lambda = 254$  nm.

### Generalization of protocol, reaction conditions, and physical properties of compounds 4 (a-l)

Table 1. Generalization of protocol, reaction conditions<sup>a</sup>, and physical properties of compounds 4 (a-l)

| Compounds | 1,3-dione                                                                                                                                             | Products                                                                                                                                                                                                                | Color      | Time (hours) | Yield (%) <sup>b</sup> | M.P. (°C) |
|-----------|-------------------------------------------------------------------------------------------------------------------------------------------------------|-------------------------------------------------------------------------------------------------------------------------------------------------------------------------------------------------------------------------|------------|--------------|------------------------|-----------|
| 4a        | 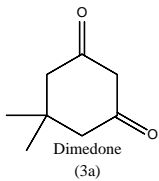 <p>Dimedone<br/>(3a)</p>                                            |  <p>5'-bromo-9,9-dimethyl-9,10-dihydrospiro[benzo<sup>a</sup>]thioxanthene-12,3'-indoline]-2',11(8<math>H</math>)-dione</p>            | Cream      | 7            | 92                     | 160-162   |
| 4b        |  <p>Barbituric acid<br/>(3b)</p>                                   |  <p>5'-bromospiro[benzo[5,6]thiochromeno[2,3-<i>d</i>]pyrimidine-12,3'-indoline]-2',9,11(8<math>H</math>,10<math>H</math>)-trione</p> | Violet     | 6            | 82                     | 124-126   |
| 4c        |  <p>4-hydroxy-1-methylquinolin-2(1<math>H</math>)-one (3c)</p>     |  <p>5'-bromo-5-methylspiro[benzo[5,6]thiochromeno[3,2-<i>c</i>]quinoline-7,3'-indoline]-2',6(5<math>H</math>)-dione</p>              | Coral pink | 6            | 79                     | 174-176   |
| 4d        |  <p>1<math>H</math>-indene-1,3(2<math>H</math>)-dione<br/>(3d)</p> |  <p>5'-bromo-12<math>H</math>-spiro[benzo[<i>f</i>]indeno[1,2-<i>b</i>]thiochromene-13,3'-indoline]-2',12-dione</p>                  | Dark brown | 6            | 88                     | 160-162   |



|    |                                                                                                                              |                                                                                                                                                                                                      |               |     |    |         |
|----|------------------------------------------------------------------------------------------------------------------------------|------------------------------------------------------------------------------------------------------------------------------------------------------------------------------------------------------|---------------|-----|----|---------|
| 4e | 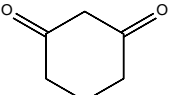 <p>Cyclohexane-1,3-dione<br/>(3e)</p>      |  <p>5'-bromo-9,10-dihydrospiro[benzo<sup>a</sup>]thioxanthene-12,3'-indoline]-2',11(8<i>H</i>)-dione</p>            | Off white     | 7   | 72 | 114-116 |
| 4f |  <p>4-hydroxy-2H-chromen-2-one<br/>(3f)</p> |  <p>5'-bromo-6<i>H</i>-spiro[benzo[5,6]thiochromeno[3,2-<i>c</i>]chromene-7,3'-indoline]-2',6-dione</p>             | Rust brown    | 6   | 76 | 182-184 |
| 4g |  <p>Dimedone<br/>(3a)</p>                  |  <p>9,9-dimethyl-9,10-dihydrospiro[benzo<sup>a</sup>]thioxanthene-12,3'-indoline]-2',11(8<i>H</i>)-dione</p>       | Cream         | 6   | 87 | 152-154 |
| 4h |  <p>Barbituric acid<br/>(3b)</p>          |  <p>spiro[benzo[5,6]thiochromeno[2,3-<i>d</i>]pyrimidine-12,3'-indoline]-2',9,11(8<i>H</i>,10<i>H</i>)-trione</p> | Charcoal gray | 4.5 | 92 | 124-126 |



|    |                                                                                                                                       |                                                                                                                                                                                          |          |   |    |         |
|----|---------------------------------------------------------------------------------------------------------------------------------------|------------------------------------------------------------------------------------------------------------------------------------------------------------------------------------------|----------|---|----|---------|
| 4i | 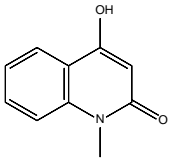 <p>4-hydroxy-1-methylquinolin-2(1H)-one (3c)</p>    |  <p>5-methylspiro[benzo[5,6]thiochromen[3,2-<i>c</i>]quinoline-7,3'-indoline]-2',6(5<i>H</i>)-dione</p> | Beige    | 5 | 87 | 192-194 |
| 4j |  <p>4-hydroxy-2H-chromen-2-one (3f)</p>              |  <p>6<i>H</i>-spiro[benzo[5,6]thiochromen[3,2-<i>c</i>]chromene-7,3'-indoline]-2',6-dione</p>           | Sand     | 6 | 92 | 152-154 |
| 4k |  <p>Cyclohexane-1,3-dione (3e)</p>                  |  <p>9,10-dihydrospiro[benzo[<i>a</i>]thioxanthen-12,3'-indoline]-2',11(8<i>H</i>)-dione</p>            | Black    | 6 | 83 | 172-174 |
| 4l |  <p>1<i>H</i>-indene-1,3(2<i>H</i>)-dione (3d)</p> |  <p>12<i>H</i>-spiro[benzo[<i>f</i>]indeno[1,2-<i>b</i>]thiochromene-13,3'-indoline]-2',12-dione</p>  | Charcoal | 6 | 90 | 162-164 |

<sup>a</sup>Reaction conditions: Isatin/5-bromoisatin (1.0 mmol), 2-naphthalenethiol (1.0 mmol), and 1,3-diketones (1.0 mmol) refluxed in 5 mL water using 28 mol% of taurine. <sup>b</sup>Isolated yields.

### ***In-vitro* anti-inflammatory activity**

The impact of the sample on heat-induced bovine serum albumin (BSA) denaturation assay was assessed using a method outlined by Chandra et al.<sup>1</sup> with minor adjustments. The reaction mixtures comprised varying concentrations (50–250 µg/mL) of the sample and the reference drug diclofenac sodium, an NSAID, along with 1% w/v BSA and phosphate-buffered saline (PBS, pH 6.4) separately, while PBS served as the control. The reaction mixtures were

incubated at 37 °C for 20 min, followed by an increase in temperature to maintain the samples at 70 °C for 5 min. After cooling, turbidity was measured at 660 nm using a UV-visible spectrophotometer. The experiment was conducted in triplicate for precision. The control represents 100% protein denaturation. Diclofenac sodium was used as a control (Standard). The percentage inhibition of BSA denaturation was calculated as follows:

$$\% \text{ Inhibition of BSA denaturation} = 100 * \left[ 1 - \left( \frac{A2}{A1} \right) \right]$$

Where A1 = absorbance of the control, and A2 = absorbance of the test sample.

The IC<sub>50</sub> values were determined using the lowess curves and cubic spline curves to fit the data and were generated with GraphPad Prism software (version 10.3.1).

### ***In silico* studies for the anti-inflammatory activity**

#### **Molecular docking studies**

Docking simulations were performed by using AutoDock VINA integrated into the PyRx 0.8<sup>2</sup> virtual screening tool to identify compounds with high binding affinity. *In silico* docking simulation studies to evaluate the molecular interactions of 4a-4l compounds were done with COX1 (PDB ID: 3KK6, co-crystallized ligand inhibitor: Celecoxib)<sup>3</sup>, COX-2 (PDB ID:5KIR, co-crystallized with Rofecoxib).<sup>4</sup> Protein structure was processed to ensure an optimized structure for docking studies and it was executed with the UCSF Chimera Dock Prep module that includes the following steps: elimination of water molecules and other ligands, addition of missing atoms and residues, energy minimization and assigning charges and polar hydrogens and then converted to the pdbqt format. The 2D structure of the ligands was drawn with ChemDraw software and the structures were optimized through energy minimization with MMFF94 force field parameters and conjugate gradient algorithm using the Open Babel module of PyRx and eventually converted the ligands to the AutoDock compatible pdbqt format to carry out docking exploration. Post-docking analysis and visualization of binding poses and molecular interactions were done with BIOVIA Discovery Studio 2021 and Chimera X tools.<sup>5</sup> Autodock Vina grid box was created around the antagonist active site with the following details of the vina search space with the following coordinates (Å), X: -33.259, Y: 43.443, Z: -5.595 for COX-1, X: 23.606, Y: 1.782, Z: 34.5785 for COX-2. The validation process of the docking program involved the meticulous redocking of Celecoxib into its co-crystallized site. The remarkably low Root Mean Square Deviation (RMSD) value of 0.64 Å, observed between the docked and native poses, serves as a robust indicator of the program's efficacy in accurately predicting the binding pose of Celecoxib. This outcome underscores the program's proficiency in faithfully reproducing the spatial arrangement of Celecoxib within its intended binding site, affirming the reliability and precision of the docking algorithm.

**Table 2.** Molecular interaction summary of compounds with COX-1

| Compounds | Binding               | Interacting Amino acids* | Nature of interactions |
|-----------|-----------------------|--------------------------|------------------------|
|           | Energy<br>(K.cal/mol) |                          |                        |

|    |      |                                                                                                                                       |                                                                                                                                              |
|----|------|---------------------------------------------------------------------------------------------------------------------------------------|----------------------------------------------------------------------------------------------------------------------------------------------|
| 4a | -6.4 | <b>ASN515</b> , HIS95, PHE91, PRO514, HIS90, THR94, SER516, HIS513                                                                    | H-bond, alkyl, $\pi$ -alkyl, $\pi$ -sulfur, van der waals                                                                                    |
| 4b | -6.8 | <b>ASN515</b> , PHE356, HIS95, TYR355, SER516, THR94, HIS90, GLY354, GLN192                                                           | H-bond, $\pi$ -alkyl, $\pi$ - $\pi$ T shaped, $\pi$ - $\pi$ stacked, halogen, carbon-hydrogen bond, van der waals                            |
| 4c | -6.9 | <b>ASN515</b> , PHE356, HIS95, TYR355, PRO514, SER353, THR94, HIS513, HIS90, SER516, GLN912, GLY354, ARG97                            | H-bond, $\pi$ -alkyl, $\pi$ - $\pi$ T shaped, $\pi$ - $\pi$ stacked, $\pi$ -sigma, halogen, carbon-hydrogen bond, van der waals              |
| 4d | -7.1 | <b>ASN515</b> , THR94, HIS95, PRO514, PHE91, SER516, GLY354, PHE356                                                                   | H-bond, $\pi$ -alkyl, $\pi$ - $\pi$ T shaped, $\pi$ -sigma, carbon-hydrogen bond, van der waals                                              |
| 4e | -6.1 | HIS513, PHE91, HIS95, PRO514, SER87, PHE88, HIS90, THR94, ASN515                                                                      | alkyl, $\pi$ -alkyl, $\pi$ - $\pi$ T shaped, $\pi$ - $\pi$ stacked, $\pi$ -sulfur, carbon-hydrogen bond, van der waals                       |
| 4f | -7.3 | <b>GLY354</b> , PHE356, ASN515, THR94, GLN192, PRO191, SER516, HIS90, HIS513, PRO514, HIS95                                           | H-bond, $\pi$ - $\pi$ T shaped, $\pi$ -sigma, carbon-hydrogen bond, van der waals                                                            |
| 4g | -6.7 | <b>ASN515</b> , PRO514, PHE356, GLY96, ARG97, THR94, GLY354                                                                           | H-bond, $\pi$ -alkyl, van der waals                                                                                                          |
| 4h | -6.5 | <b>ASN515</b> , PHE356, HIS95, SER516, THR94, TYR355, GLY354, GLN192                                                                  | H-bond, $\pi$ - $\pi$ T shaped, $\pi$ - $\pi$ stacked, carbon-hydrogen bond, van der waals                                                   |
| 4i | -7.7 | <b>ASN515</b> , PHE356, PRO514, SER353, TYR355, GLY354, GLN192, THR94, SER516, HIS90, HIS513, HIS95                                   | H-bond, $\pi$ -alkyl, $\pi$ - $\pi$ T shaped, $\pi$ - $\pi$ stacked, $\pi$ -sigma, amide- $\pi$ stacked, carbon-hydrogen bond, van der waals |
| 4j | -7.2 | <b>ARG120</b> , TYR355, VAL349, MET113, VAL116, ILE523, ALA527, LEU531, ILE345, LEU534, LEU359, SER530, VAL344, LEU112, LEU357, ILE89 | H-bond, $\pi$ -alkyl, $\pi$ - $\pi$ T shaped, $\pi$ - $\pi$ stacked, $\pi$ -sigma, $\pi$ -sulfur, carbon-hydrogen bond, van der waals        |
| 4k | -6.8 | <b>ASN515</b> , HIS581, PHE356, GLN351, GLY354, THR94, PRO191, GLN192, GLY193, ASP584                                                 | H-bond, $\pi$ -alkyl, $\pi$ - $\pi$ T shaped, van der waals                                                                                  |
| 4l | -7.3 | <b>ASN515</b> , THR94, HIS95, PRO514, PHE356, PHE91, SER516, GLY354                                                                   | H-bond, $\pi$ -alkyl, $\pi$ - $\pi$ T shaped, $\pi$ -sigma, carbon-hydrogen bond, van der waals                                              |

|           |       |                                                                                                                                                                                                       |                                                                                                                     |
|-----------|-------|-------------------------------------------------------------------------------------------------------------------------------------------------------------------------------------------------------|---------------------------------------------------------------------------------------------------------------------|
| Celecoxib | -10.5 | <b>ARG120</b> , <b>GLY526</b> , SER353, LEU352, ALA527, VAL349, TYR355, VAL116, ILE517, PHE518, ILE523, TRP387, PHE381, MET522, TYR385, PHE529, LEU384, SER530, LEU531, LEU359, HIS90, SER516, GLN192 | H-bond, alkyl, $\pi$ -alkyl, $\pi$ -sulfur, $\pi$ -sigma, amide- $\pi$ stacked, carbon-hydrogen bond, van der waals |
|-----------|-------|-------------------------------------------------------------------------------------------------------------------------------------------------------------------------------------------------------|---------------------------------------------------------------------------------------------------------------------|

\*H-bond forming residues colored in green.

**Table 3.** Molecular interaction summary of compounds with COX-2

| Compounds | Binding Energy (K.cal/mol) | Interacting Amino acids*                                                                                                                                                                                                      | Nature of interactions                                                                                         |
|-----------|----------------------------|-------------------------------------------------------------------------------------------------------------------------------------------------------------------------------------------------------------------------------|----------------------------------------------------------------------------------------------------------------|
| 4a        | -7.9                       | <b>ARG120</b> , TYR355, GLY526, ALA527, LEU531, VAL349, LEU359, VAL523, LEU352, PHE518, SER353, ASN350, LEU534, VAL116, GLU524, ARG513, HIS90, ILE517, ALA516, GLN192, MET522                                                 | H-bond, alkyl, $\pi$ -alkyl, $\pi$ - $\pi$ T shaped, amide- $\pi$ stacked, carbon hydrogen bond, van der waals |
| 4b        | -8.4                       | <b>TYR355</b> , <b>SER353</b> , PHE518, MET522, LEU352, VAL349, LEU531, ALA527, LEU384, VAL523, TRP387, GLY526, ARG120, ARG513, HIS90, GLN192, ALA516, ILE517                                                                 | H-bond, alkyl, $\pi$ -alkyl, $\pi$ - $\pi$ T shaped, halogen, carbon hydrogen bond, van der waals              |
| 4c        | -7.3                       | <b>HIS95</b> , PRO514, HIS90, ALA516, ASP515, TYR91, THR94, GLY354, GLN192, ARG513                                                                                                                                            | H-bond, alkyl, $\pi$ -alkyl, $\pi$ -anion, carbon hydrogen bond, van der waals                                 |
| 4d        | -6.9                       | HIS95, ASP515, PRO514, HIS356, PRO191, GLN192, GLY354, THR94, ALA516, HIS90, TYR91                                                                                                                                            | $\pi$ -alkyl, $\pi$ -anion, $\pi$ - $\pi$ T shaped, van der waals                                              |
| 4e        | -8.9                       | <b>ALA527</b> , <b>VAL523</b> , PHE518, VAL349, LEU531, LEU352, TYR355, LEU359, MET522, GLY526, GLU524, ARG120, PRO528, VAL116, ASN350, ARG513, HIS90, SER353, GLY354, GLN192, ALA516, ILE517, TRP387, TYR385, TYR348, LEU534 | H-bond, alkyl, $\pi$ -alkyl, $\pi$ - sulphur, carbon hydrogen bond, van der waals                              |
| 4f        | -7.5                       | <b>ASP515</b> , HIS95, HIS356, LYS97, THR94, PHE96, PRO514, ALA516, GLN192, GLY354, PRO191                                                                                                                                    | H-bond, $\pi$ - $\pi$ T shaped, van der waals                                                                  |
| 4g        | -7.6                       | <b>GLY354</b> , ASP515, HIS95, PRO514, ALA516, TYR91, HIS356, THR94, HIS90, TYR355, SER353, ILE517, GLN192, PRO191                                                                                                            | H-bond, $\pi$ -alkyl, $\pi$ -anion, $\pi$ - $\pi$ T shaped, van der waals                                      |
| 4h        | -8.6                       | <b>ALA527</b> , <b>SER353</b> , LEU352, SER530, LEU531, VAL349, VAL523, PHE518, LEU534, TYR348, TYR385, TRP387, ILE517, GLN192, ALA516, HIS90, LEU359, ASN350, TYR355, VAL116, ARG120                                         | H-bond, $\pi$ -alkyl, $\pi$ -sigma, $\pi$ - sulphur, amide- $\pi$ stacked, carbon hydrogen bond, van der waals |

|           |       |                                                                                                                                                                                                                       |                                                                                                                                                          |
|-----------|-------|-----------------------------------------------------------------------------------------------------------------------------------------------------------------------------------------------------------------------|----------------------------------------------------------------------------------------------------------------------------------------------------------|
| 4i        | -7.8  | <b>ALA527</b> , TYR355, SER530, LEU352, PHE518, HIS90, LEU359, LEU531, VAL349, ALA516, VAL523, SER353, PRO528, ARG120, VAL116, GLY354, ARG513, GLN192, ILE517, TRP387, TYR348, TYR385, LEU534                         | H-bond, $\pi$ -alkyl, $\pi$ -sigma, $\pi$ - sulphur, $\pi$ - $\pi$ T shaped, amide- $\pi$ stacked, $\pi$ -lone pair, carbon hydrogen bond, van der waals |
| 4j        | -7.9  | <b>ALA527</b> , TYR355, SER530, PHE518, LEU352, ALA516, VAL349, LEU531, LEU359, SER353, VAL523, HIS90, GLN192, ILE517, TRP387, TYR385, TYR348, LEU534, ASN350, VAL116, ARG120                                         | H-bond, $\pi$ -alkyl, $\pi$ -sigma, $\pi$ - sulphur, $\pi$ - $\pi$ Tshaped, amide- $\pi$ stacked, carbon hydrogen bond, van der waals                    |
| 4k        | -8.7  | <b>ALA527</b> , <b>VAL523</b> , SER530, LEU531, VAL349, LEU352, PHE518, LEU534, TYR348, TYR385, TRP387, ILE517, GLN192, ALA516, HIS90, LEU359, GLY354, SRG513, SER353, TYR355, VAL116, ARG120, GLY526                 | H-bond, alkyl, $\pi$ -alkyl, amide- $\pi$ stacked, $\pi$ - sulphur, carbon hydrogen bond, van der waals                                                  |
| 4l        | -7.6  | <b>GLY354</b> , HIS95, ASP115, PRO514, ALA516, PRO191, GLN192, HIS356, THR94, TYR355, SER353, HIS90, ILE517, TYR91                                                                                                    | H-bond, $\pi$ -alkyl, $\pi$ - $\pi$ T shaped, $\pi$ -anion, van der waals                                                                                |
| Celecoxib | -11.6 | <b>ARG513</b> , <b>LEU352</b> , <b>GLN192</b> , <b>PHE518</b> , <b>ILE517</b> , SER353, TRP387, TYR385, ALA527, LEU359, TYR355, LEU531, VAL116, VAL349, VAL523, HIS90, ARG120, ALA516, GLY354, MET522, GLY526, LEU384 | H-bond, alkyl, $\pi$ -alkyl, $\pi$ -sigma, carbon hydrogen bond, van der waals                                                                           |

\*H-bond forming residues colored in green.

## ADMET studies

To evaluate the pharmacokinetic properties of our compounds, we performed an in-silico assessment using online servers such as pkCSM (<https://biosig.lab.uq.edu.au/pkcsm/prediction>)<sup>6</sup> and SwissADME (<http://www.swissadme.ch/>).<sup>7</sup> These platforms analyze the pharmacokinetic profiles of top compounds, focusing on aspects such as water solubility, toxicity, metabolism, distribution, and absorption. They predict pharmacokinetic parameters based on the structural similarity of compounds with known ADMET features. These machine learning-based tools are highly regarded for their reliability and accuracy in ADMET prediction. SWISS ADME webserver had been used for the evaluation of physico-chemical and drug-likeness properties of compounds which are found to be promising in the *in vitro* and *in-silico* assessments.

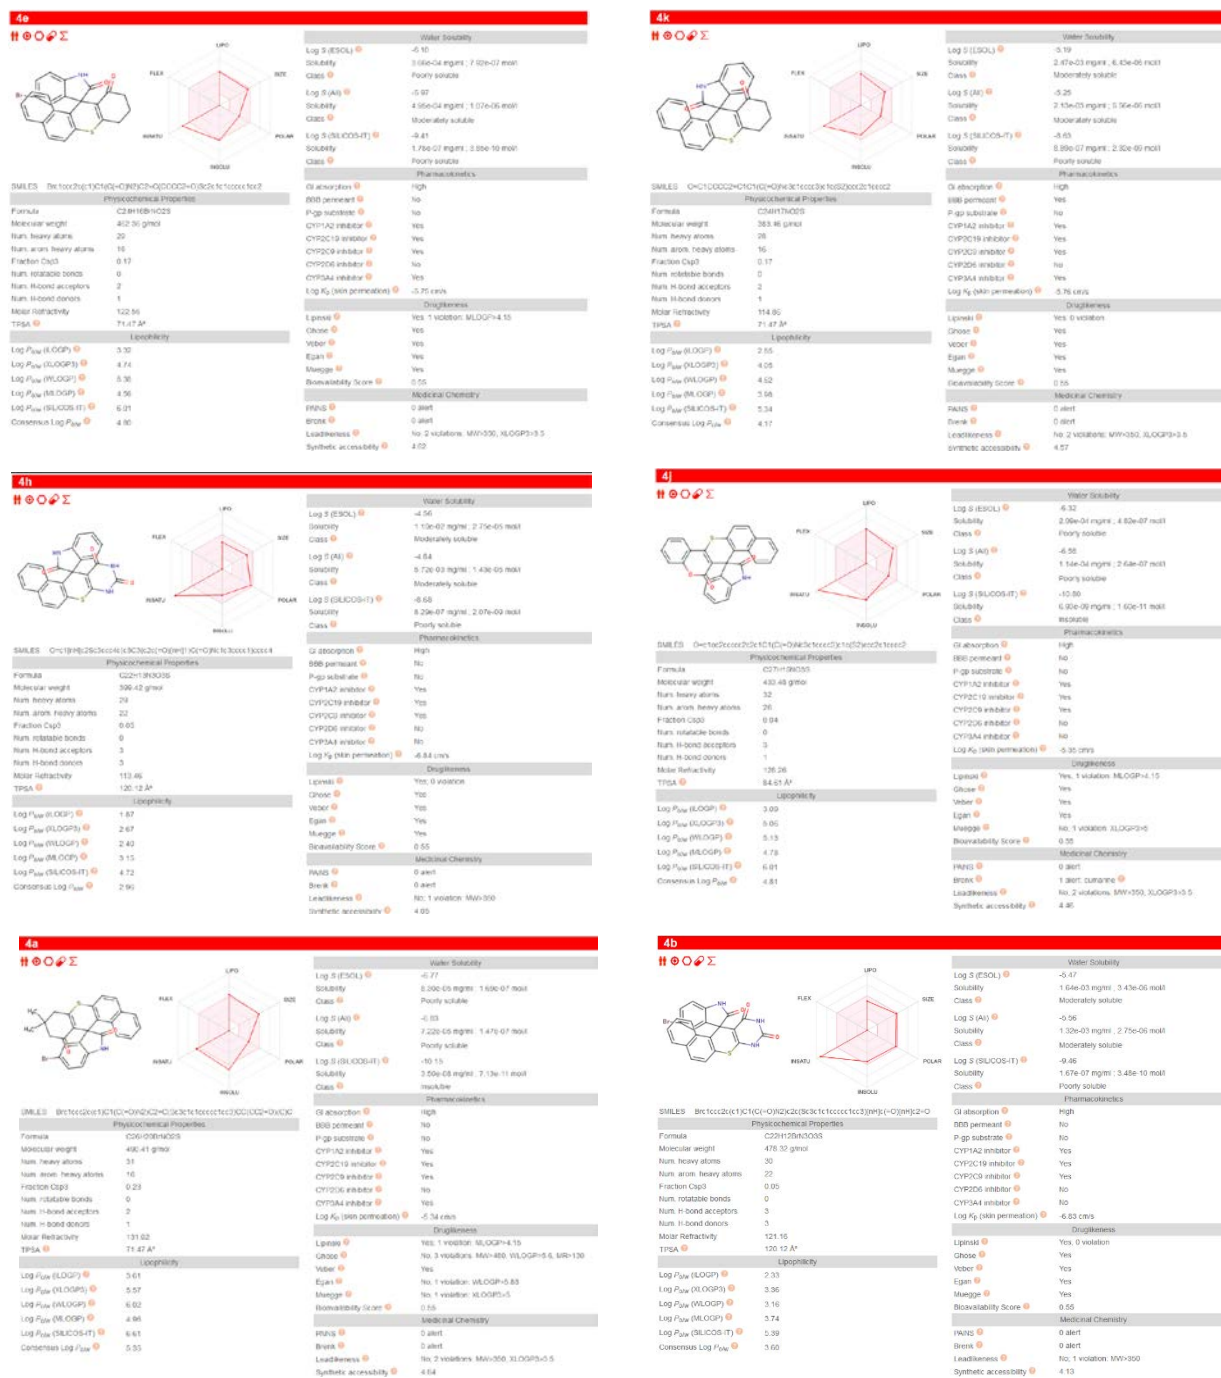

Figure 1. ADMET results for top compounds 4e, 4k, 4h, 4j, 4a, 4b.

<sup>1</sup>H NMR, <sup>13</sup>C NMR, Mass Spectra, and HPLC traces of synthesized compounds.

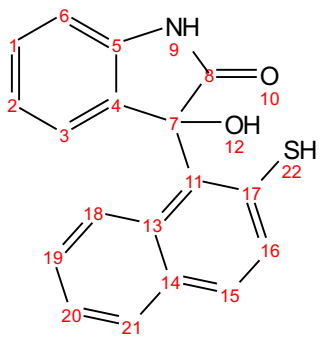

<sup>1</sup>H NMR of 2' (500 MHz, CDCl<sub>3</sub>)

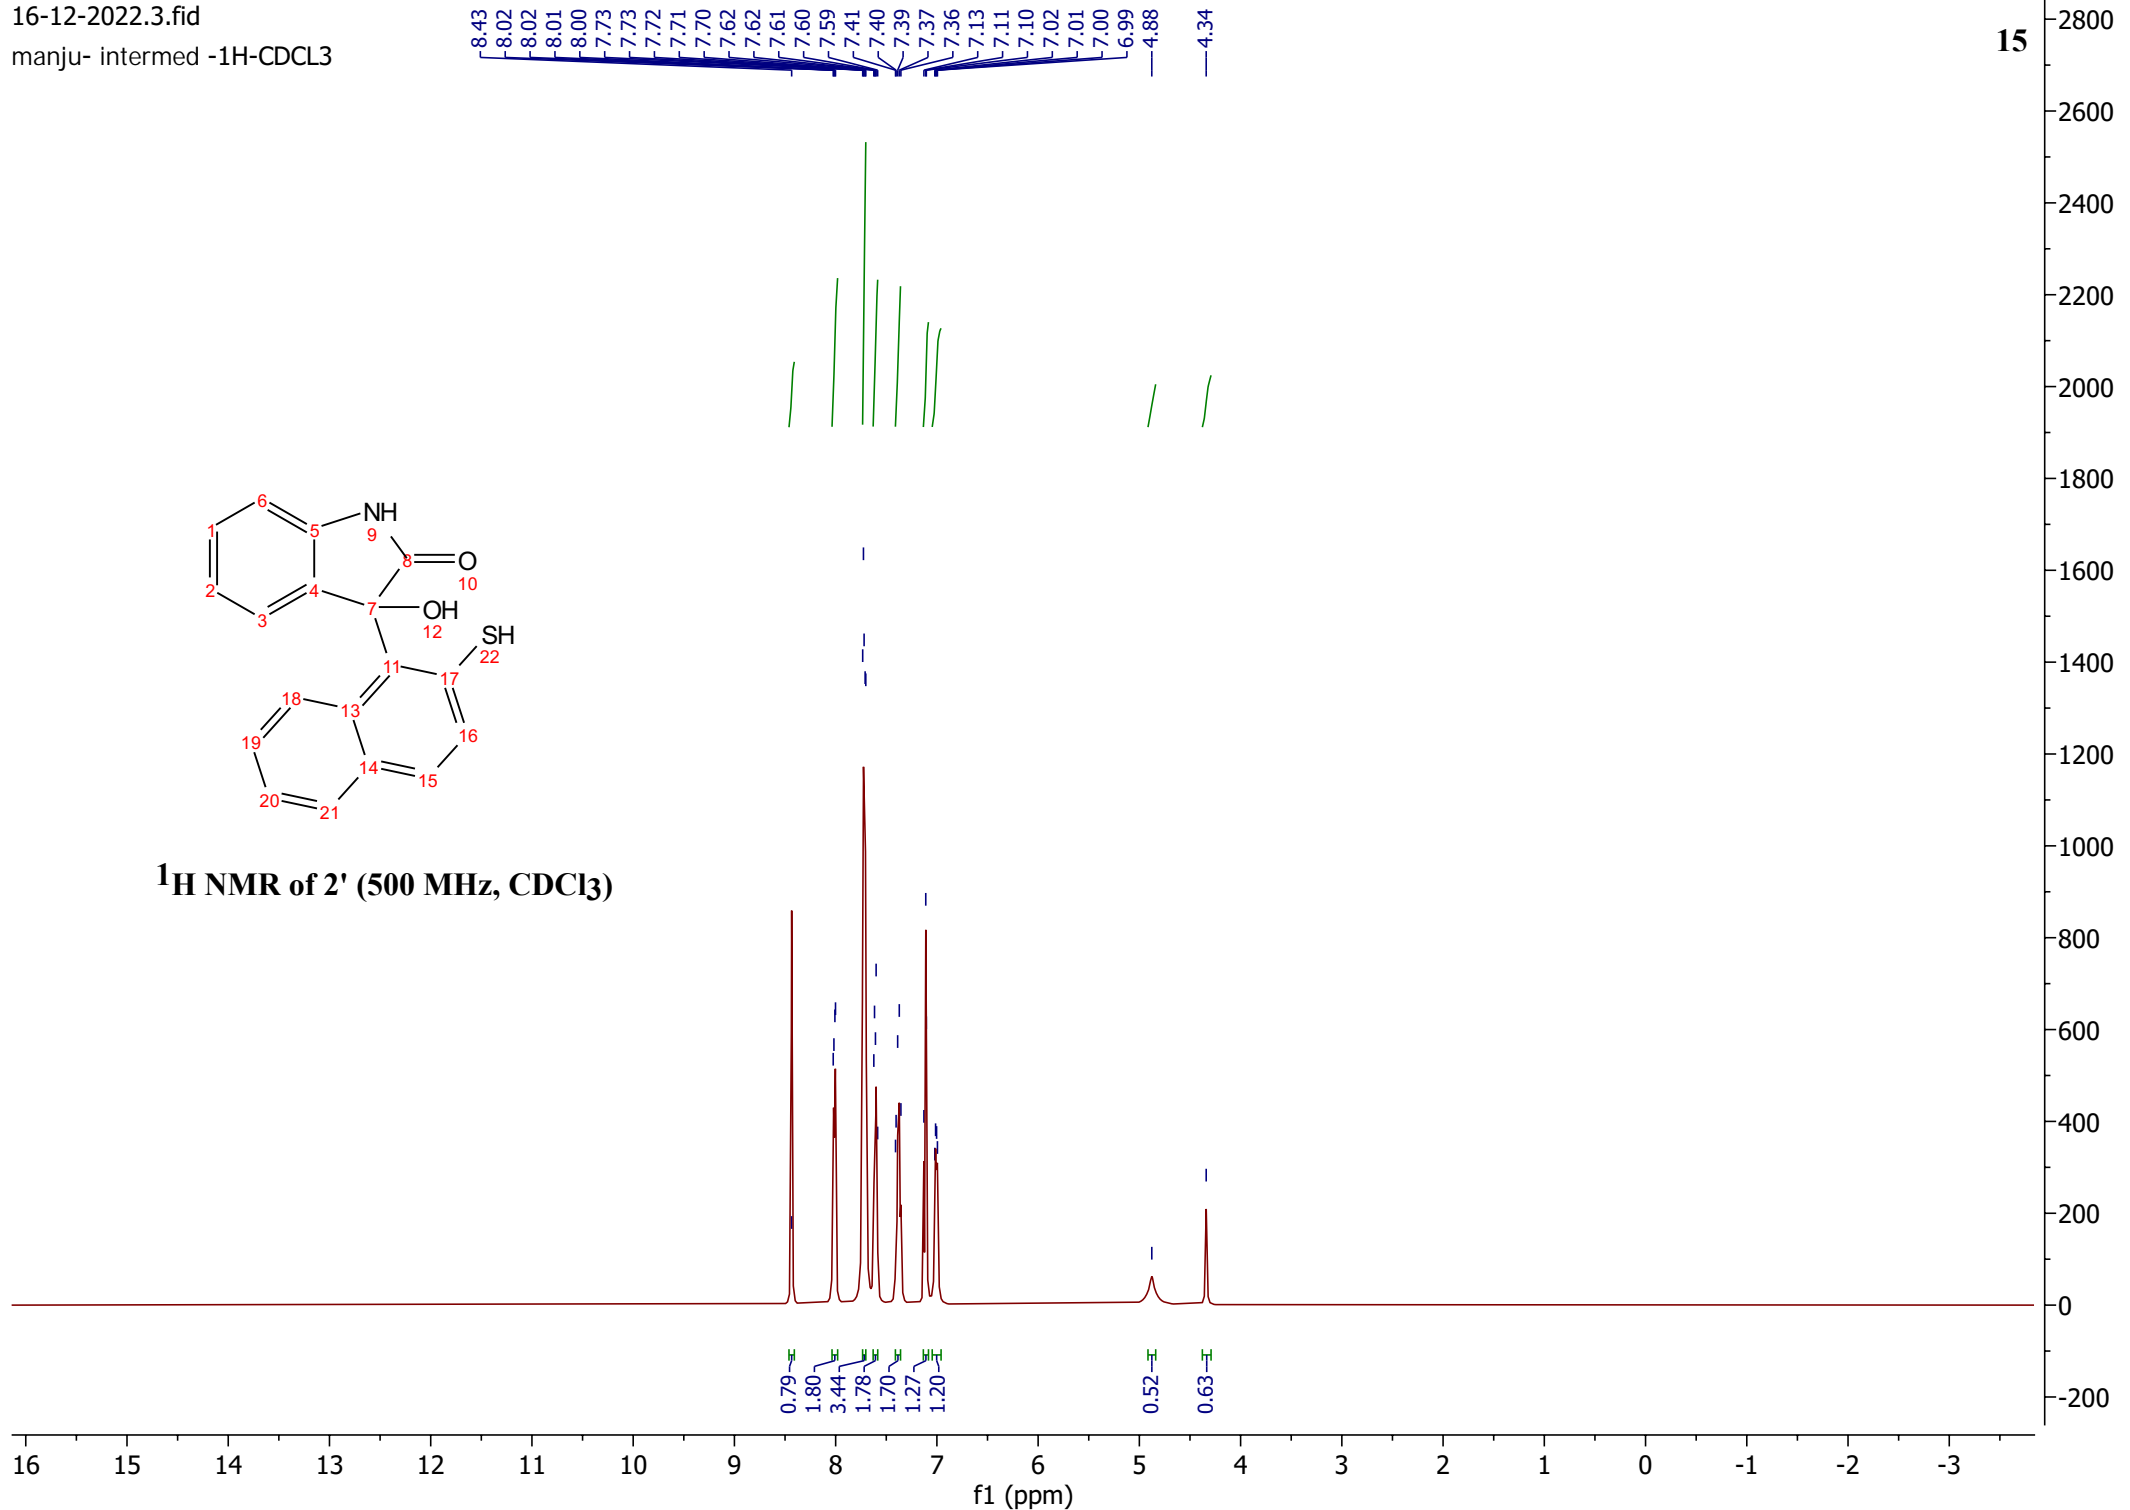



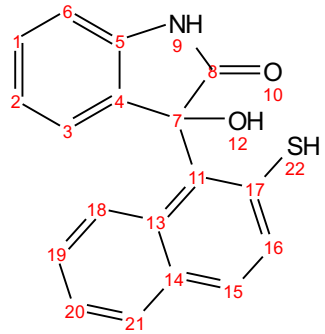

<sup>13</sup>C {H} NMR of 2' (500 MHz, CDCl<sub>3</sub>)

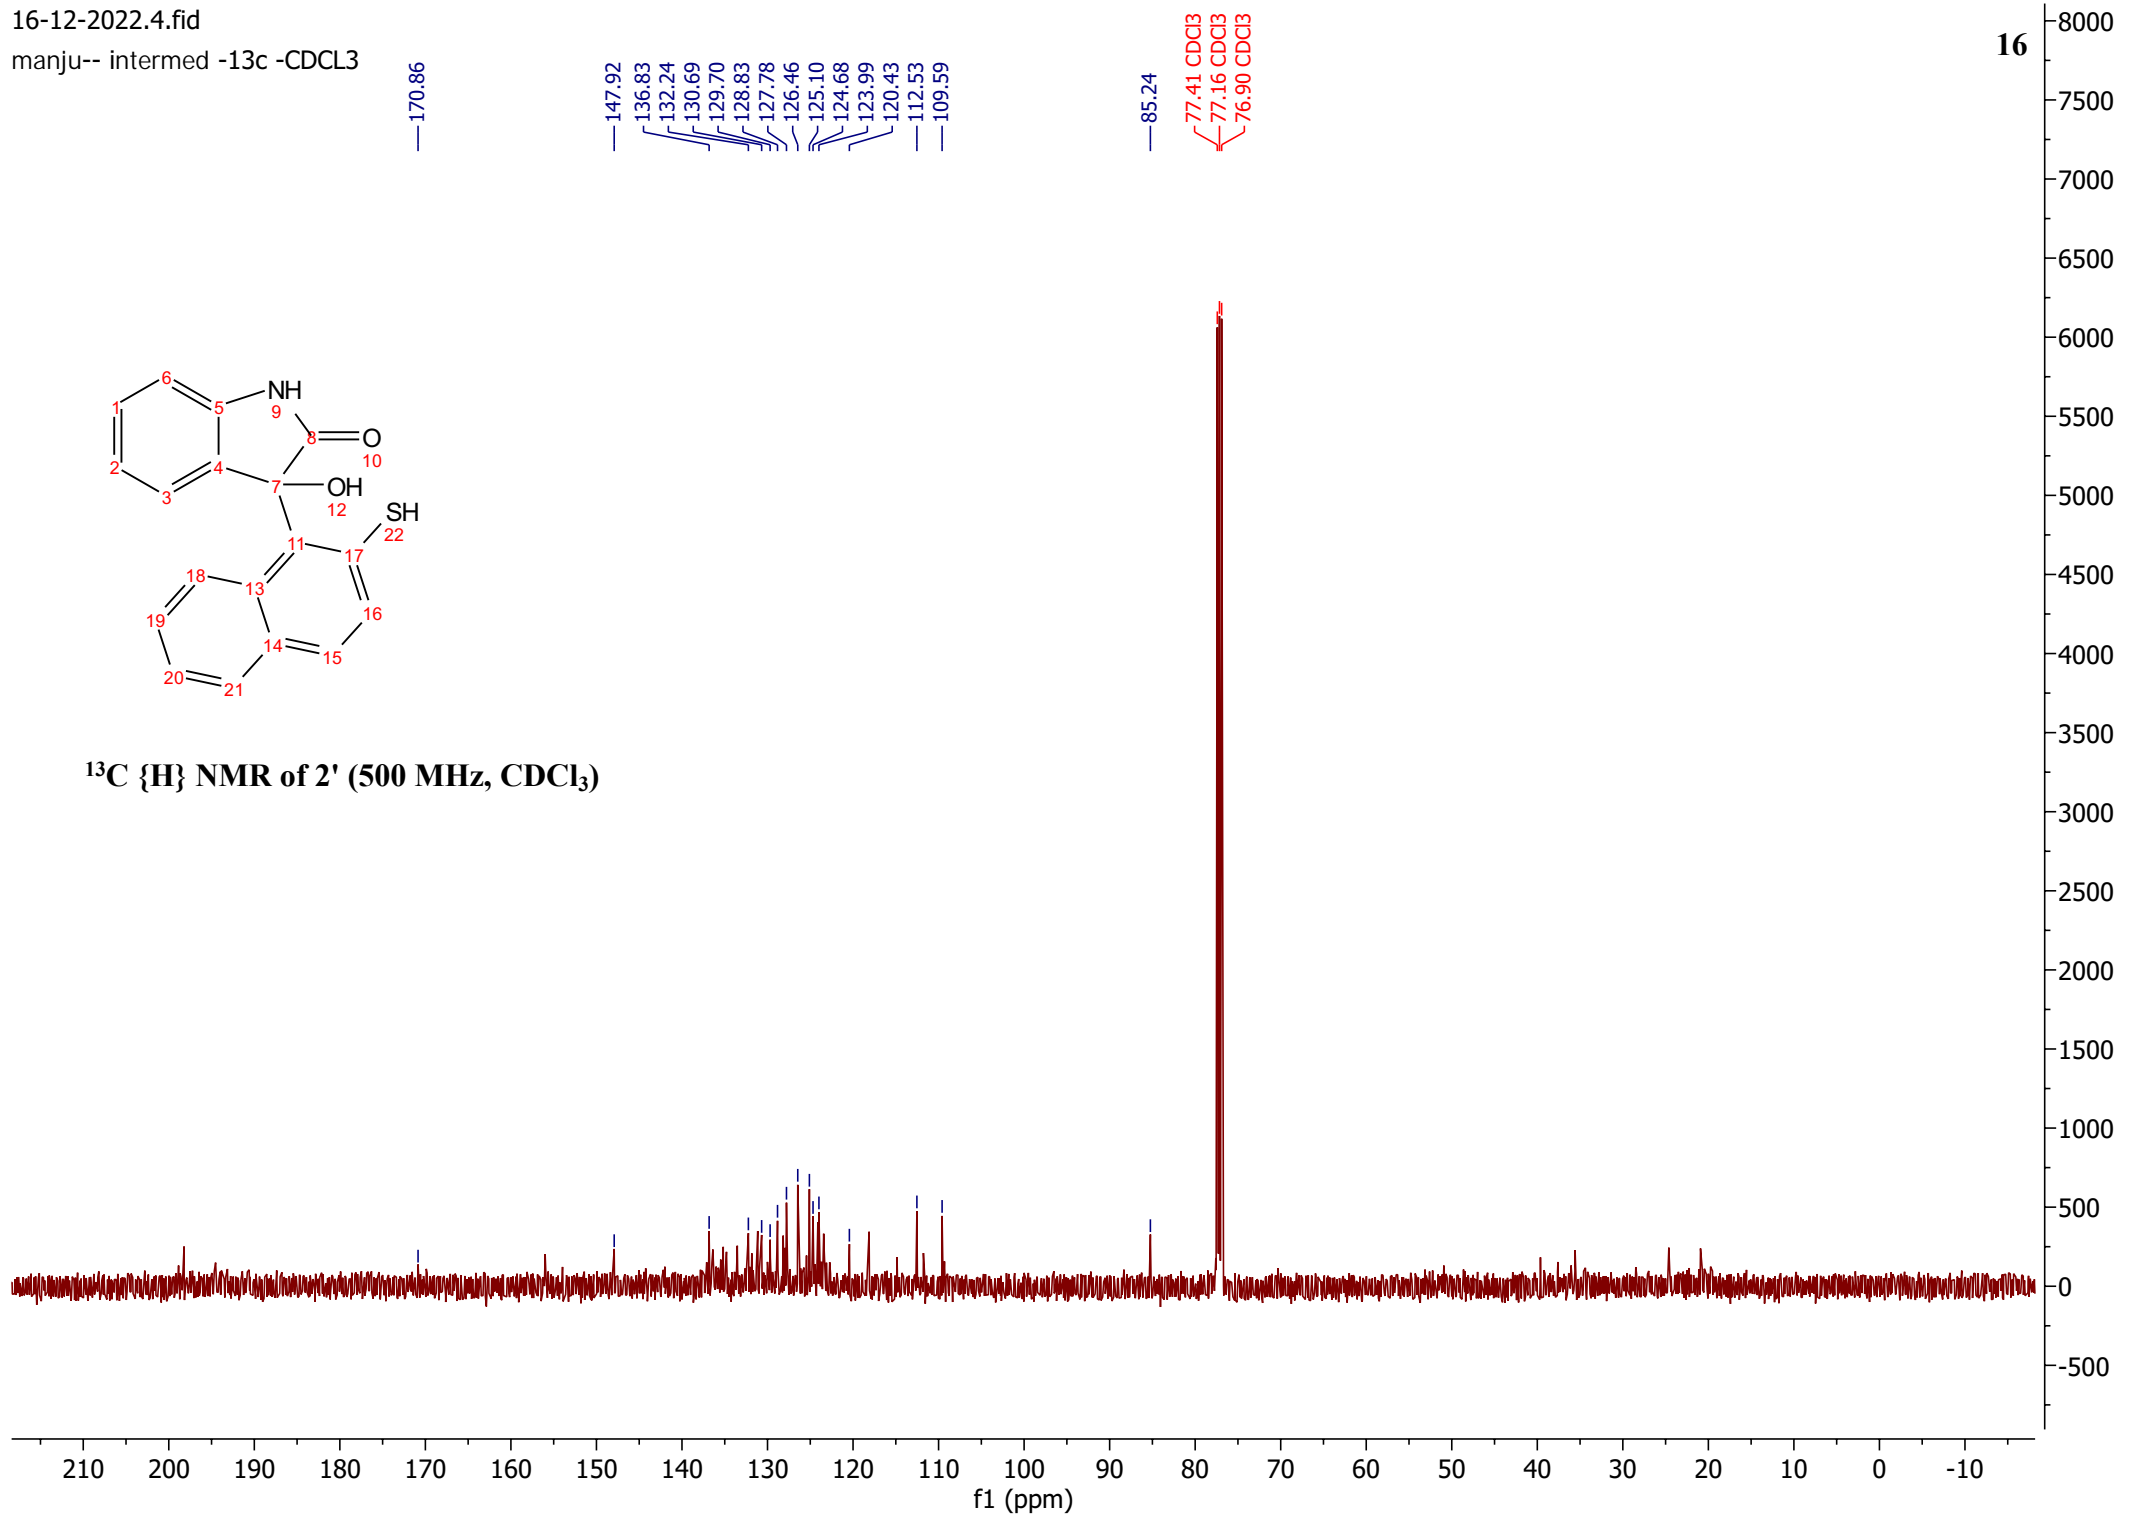

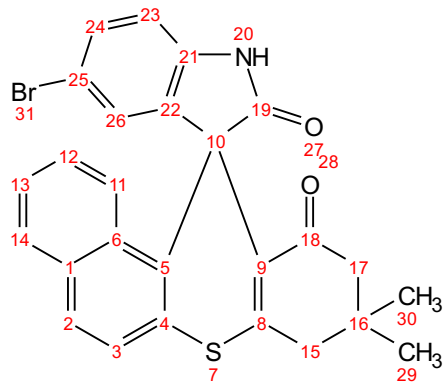

**<sup>1</sup>H NMR of 4a (500 MHz, CDCl<sub>3</sub>)**

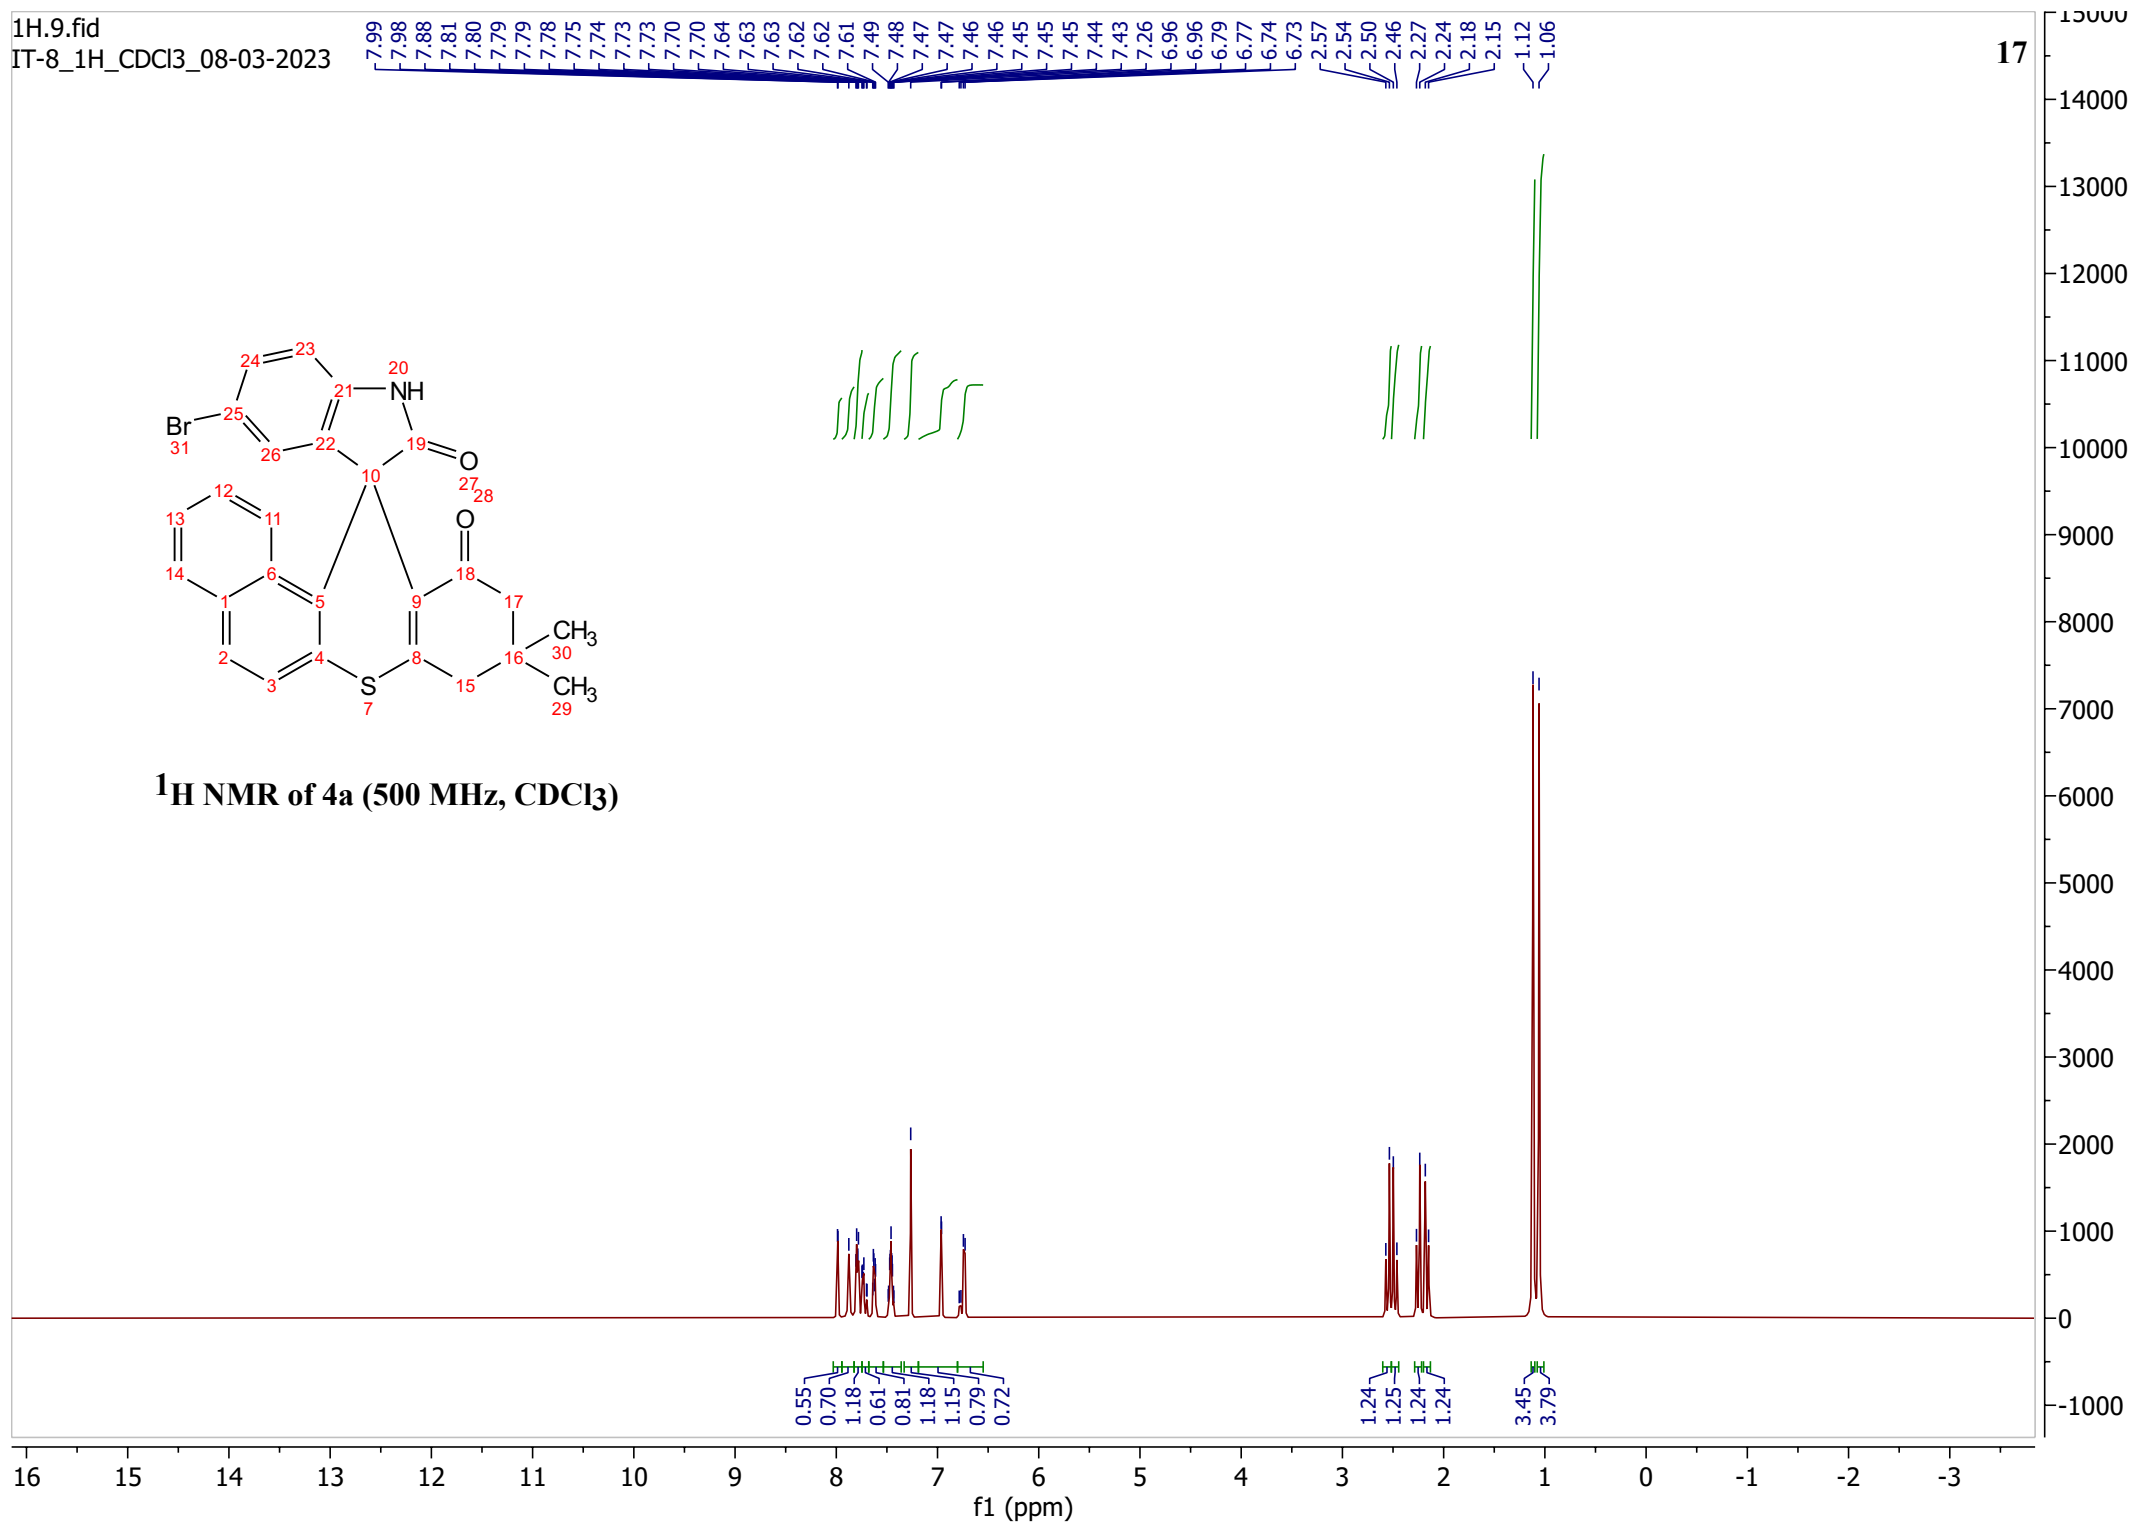

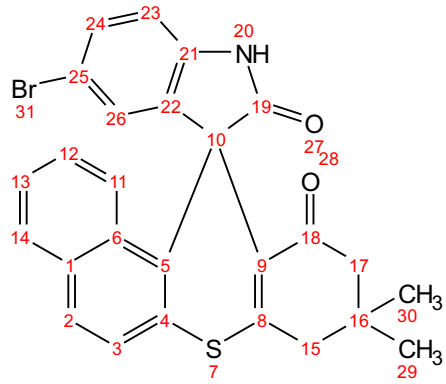

<sup>13</sup>C {H} NMR of 4a (500 MHz, CDCl<sub>3</sub>)

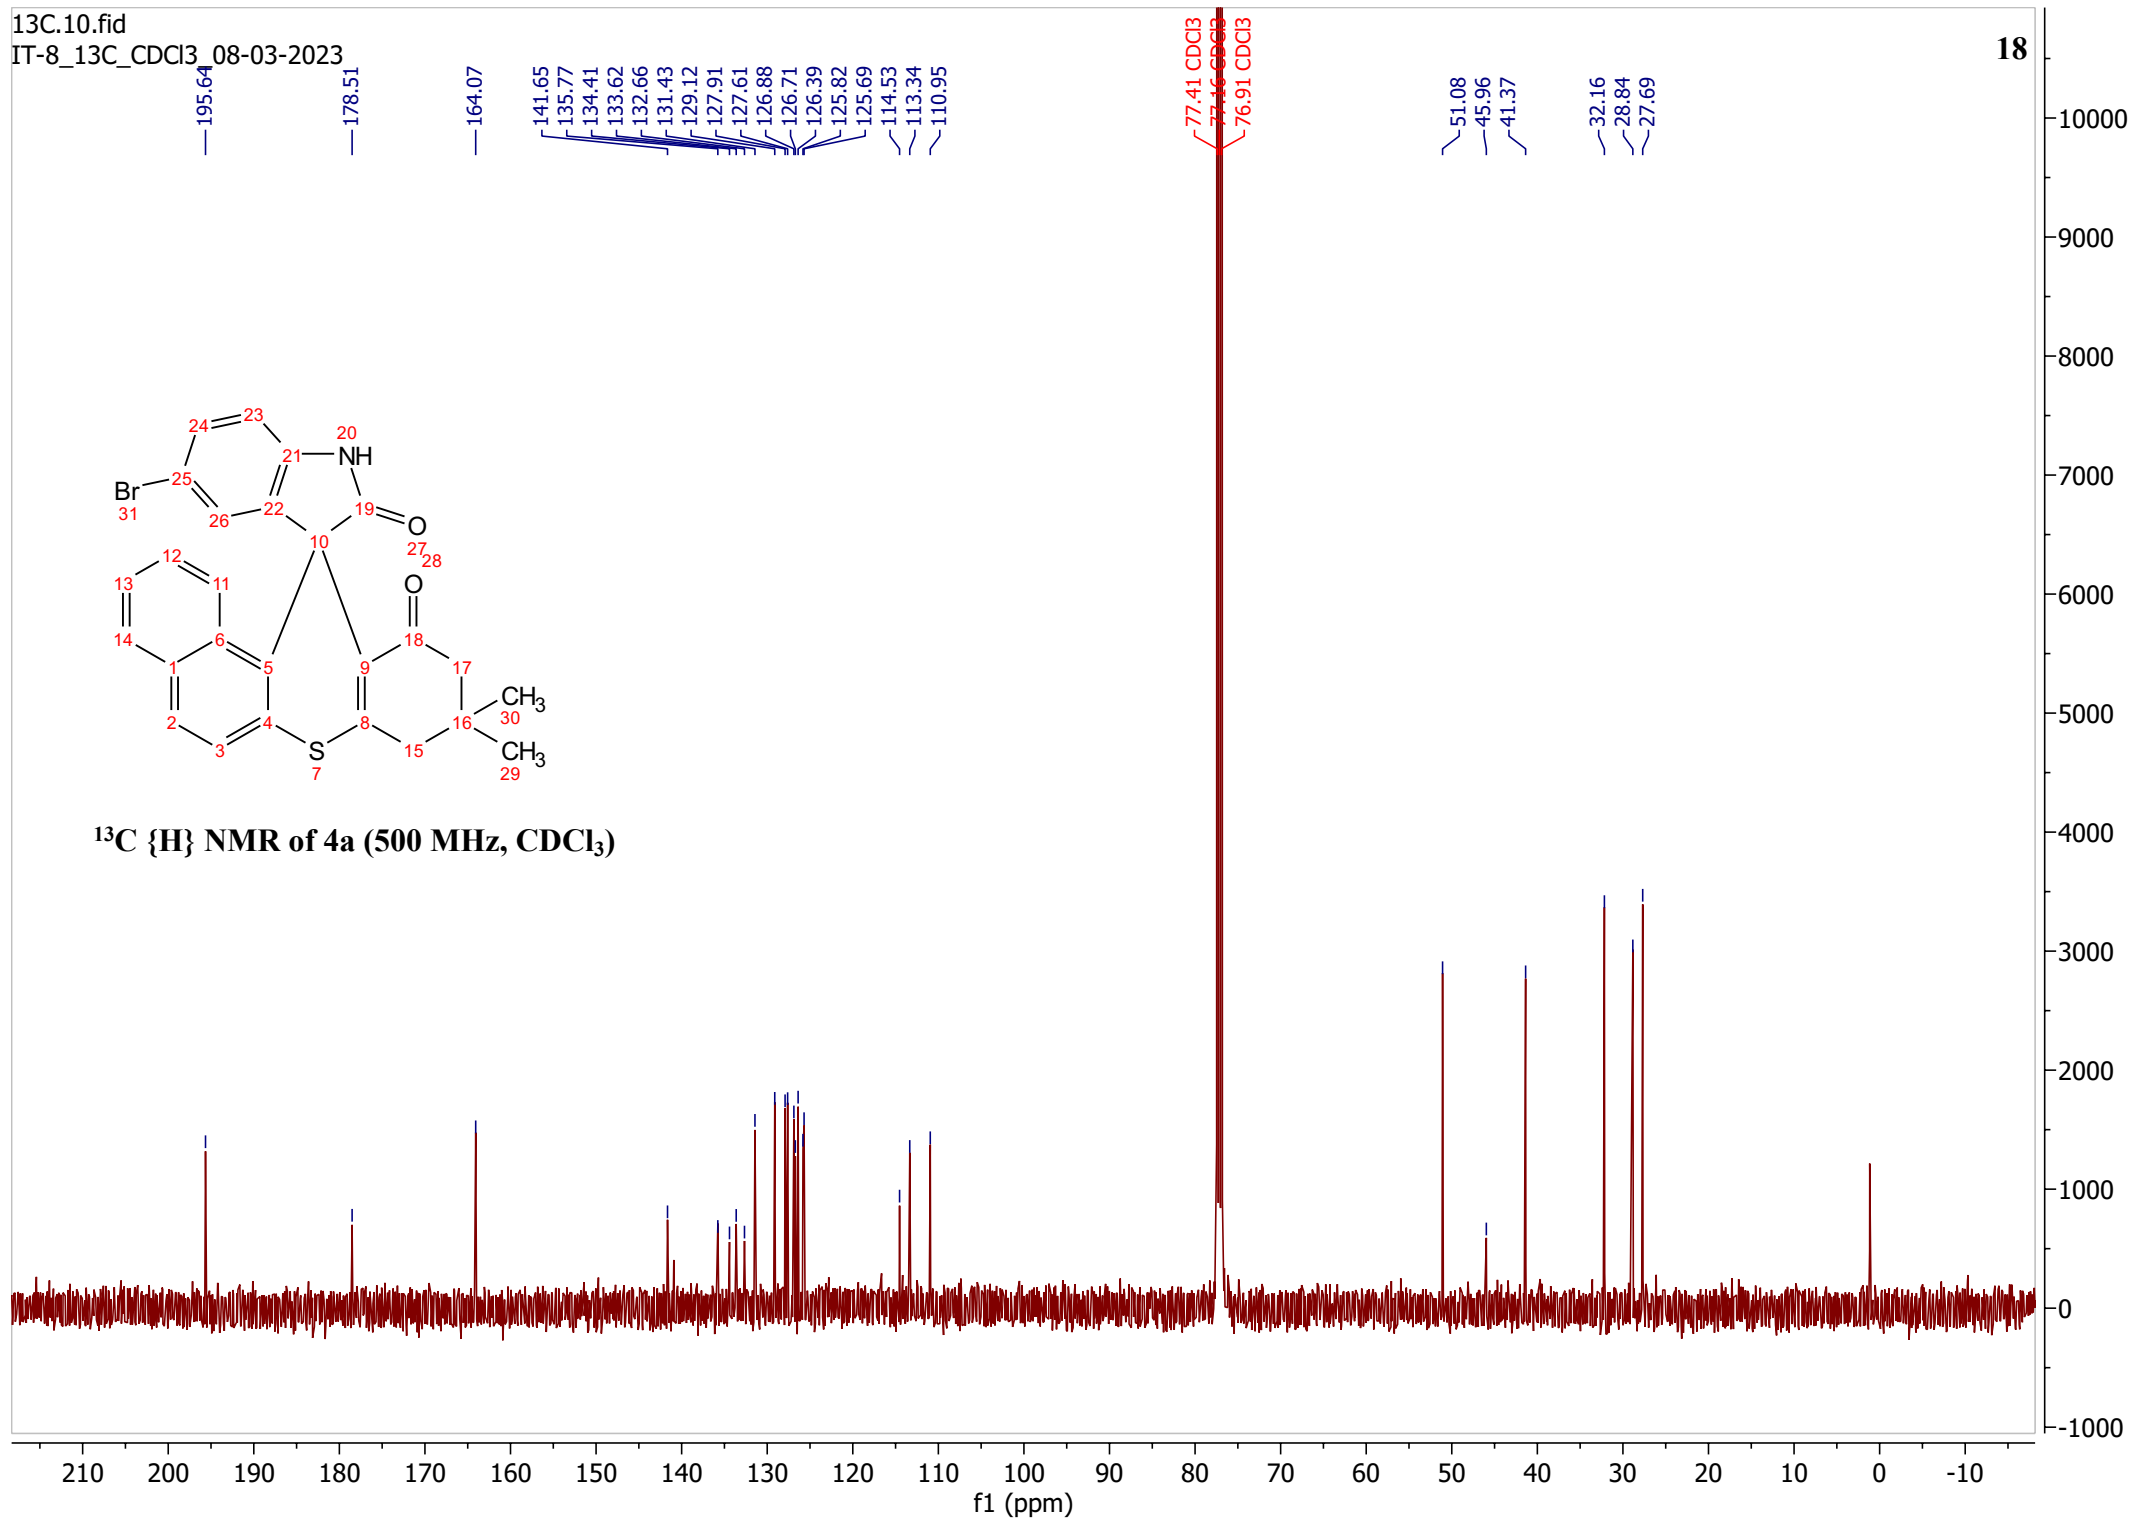

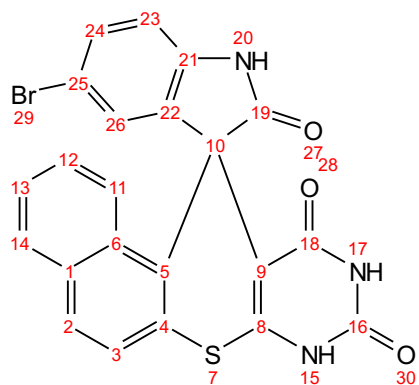

**<sup>1</sup>H NMR of 4b (500 MHz, CDCl<sub>3</sub>)**

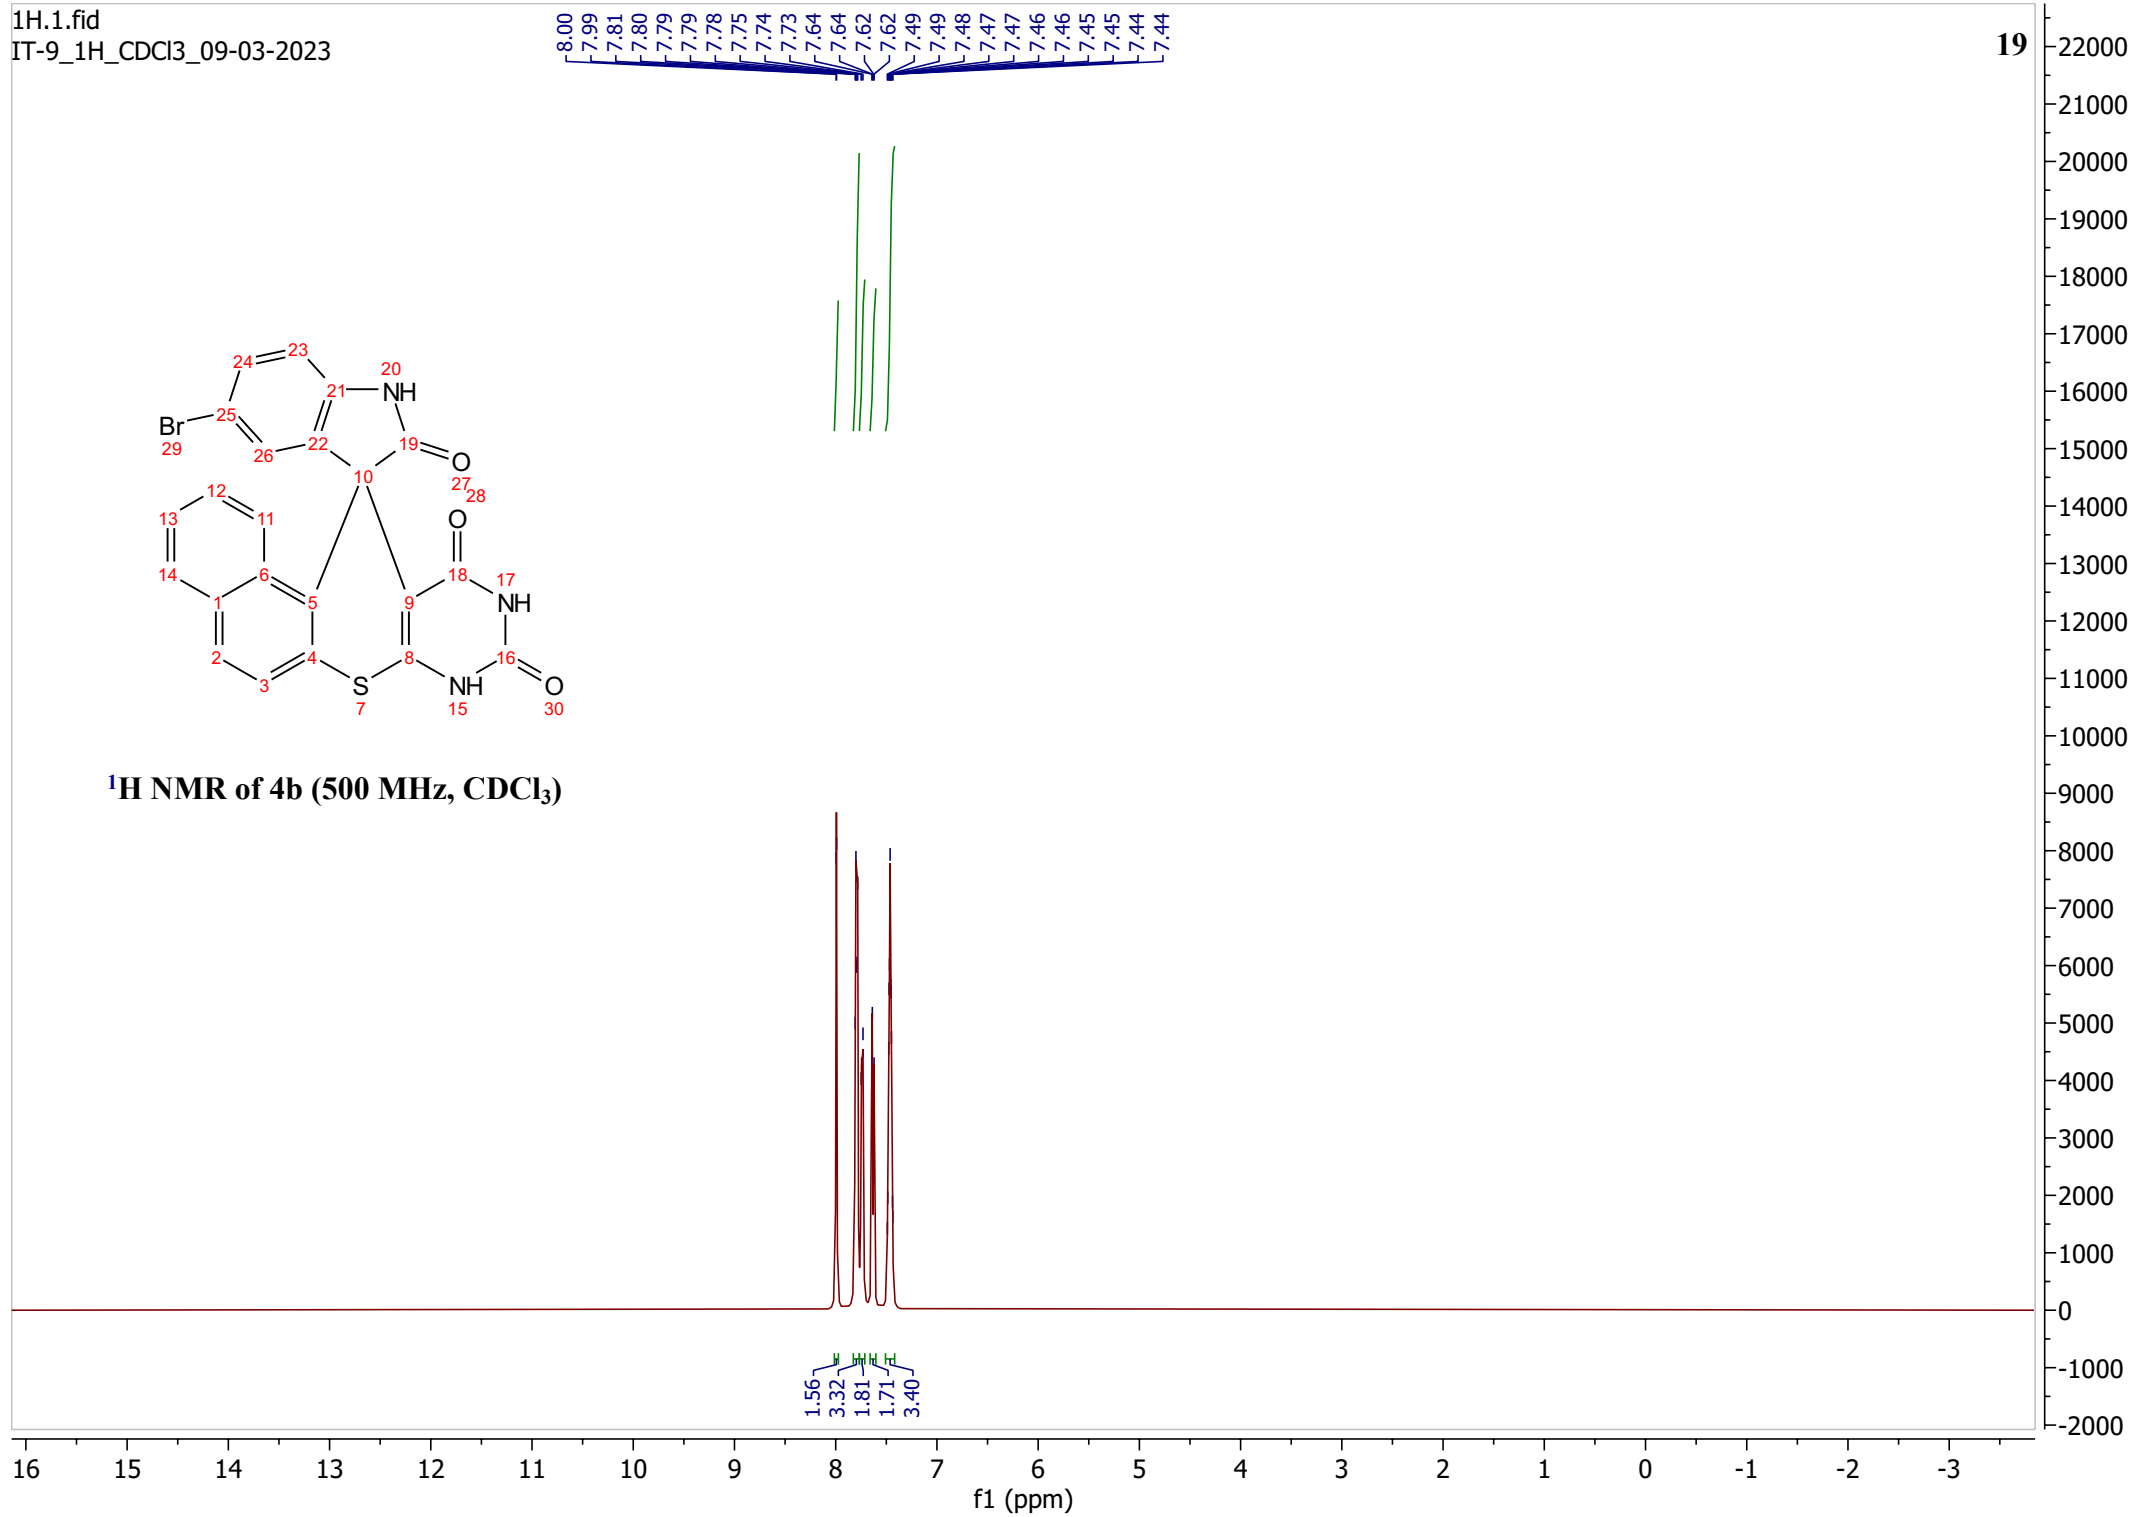

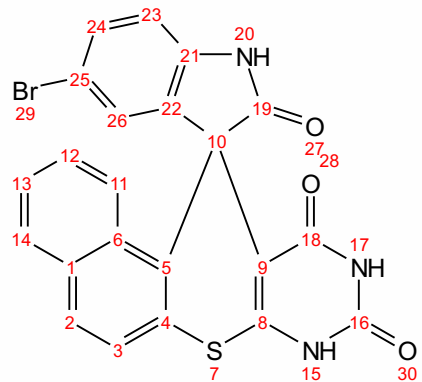

<sup>13</sup>C {<sup>1</sup>H} NMR of 4b (500 MHz, CDCl<sub>3</sub>)

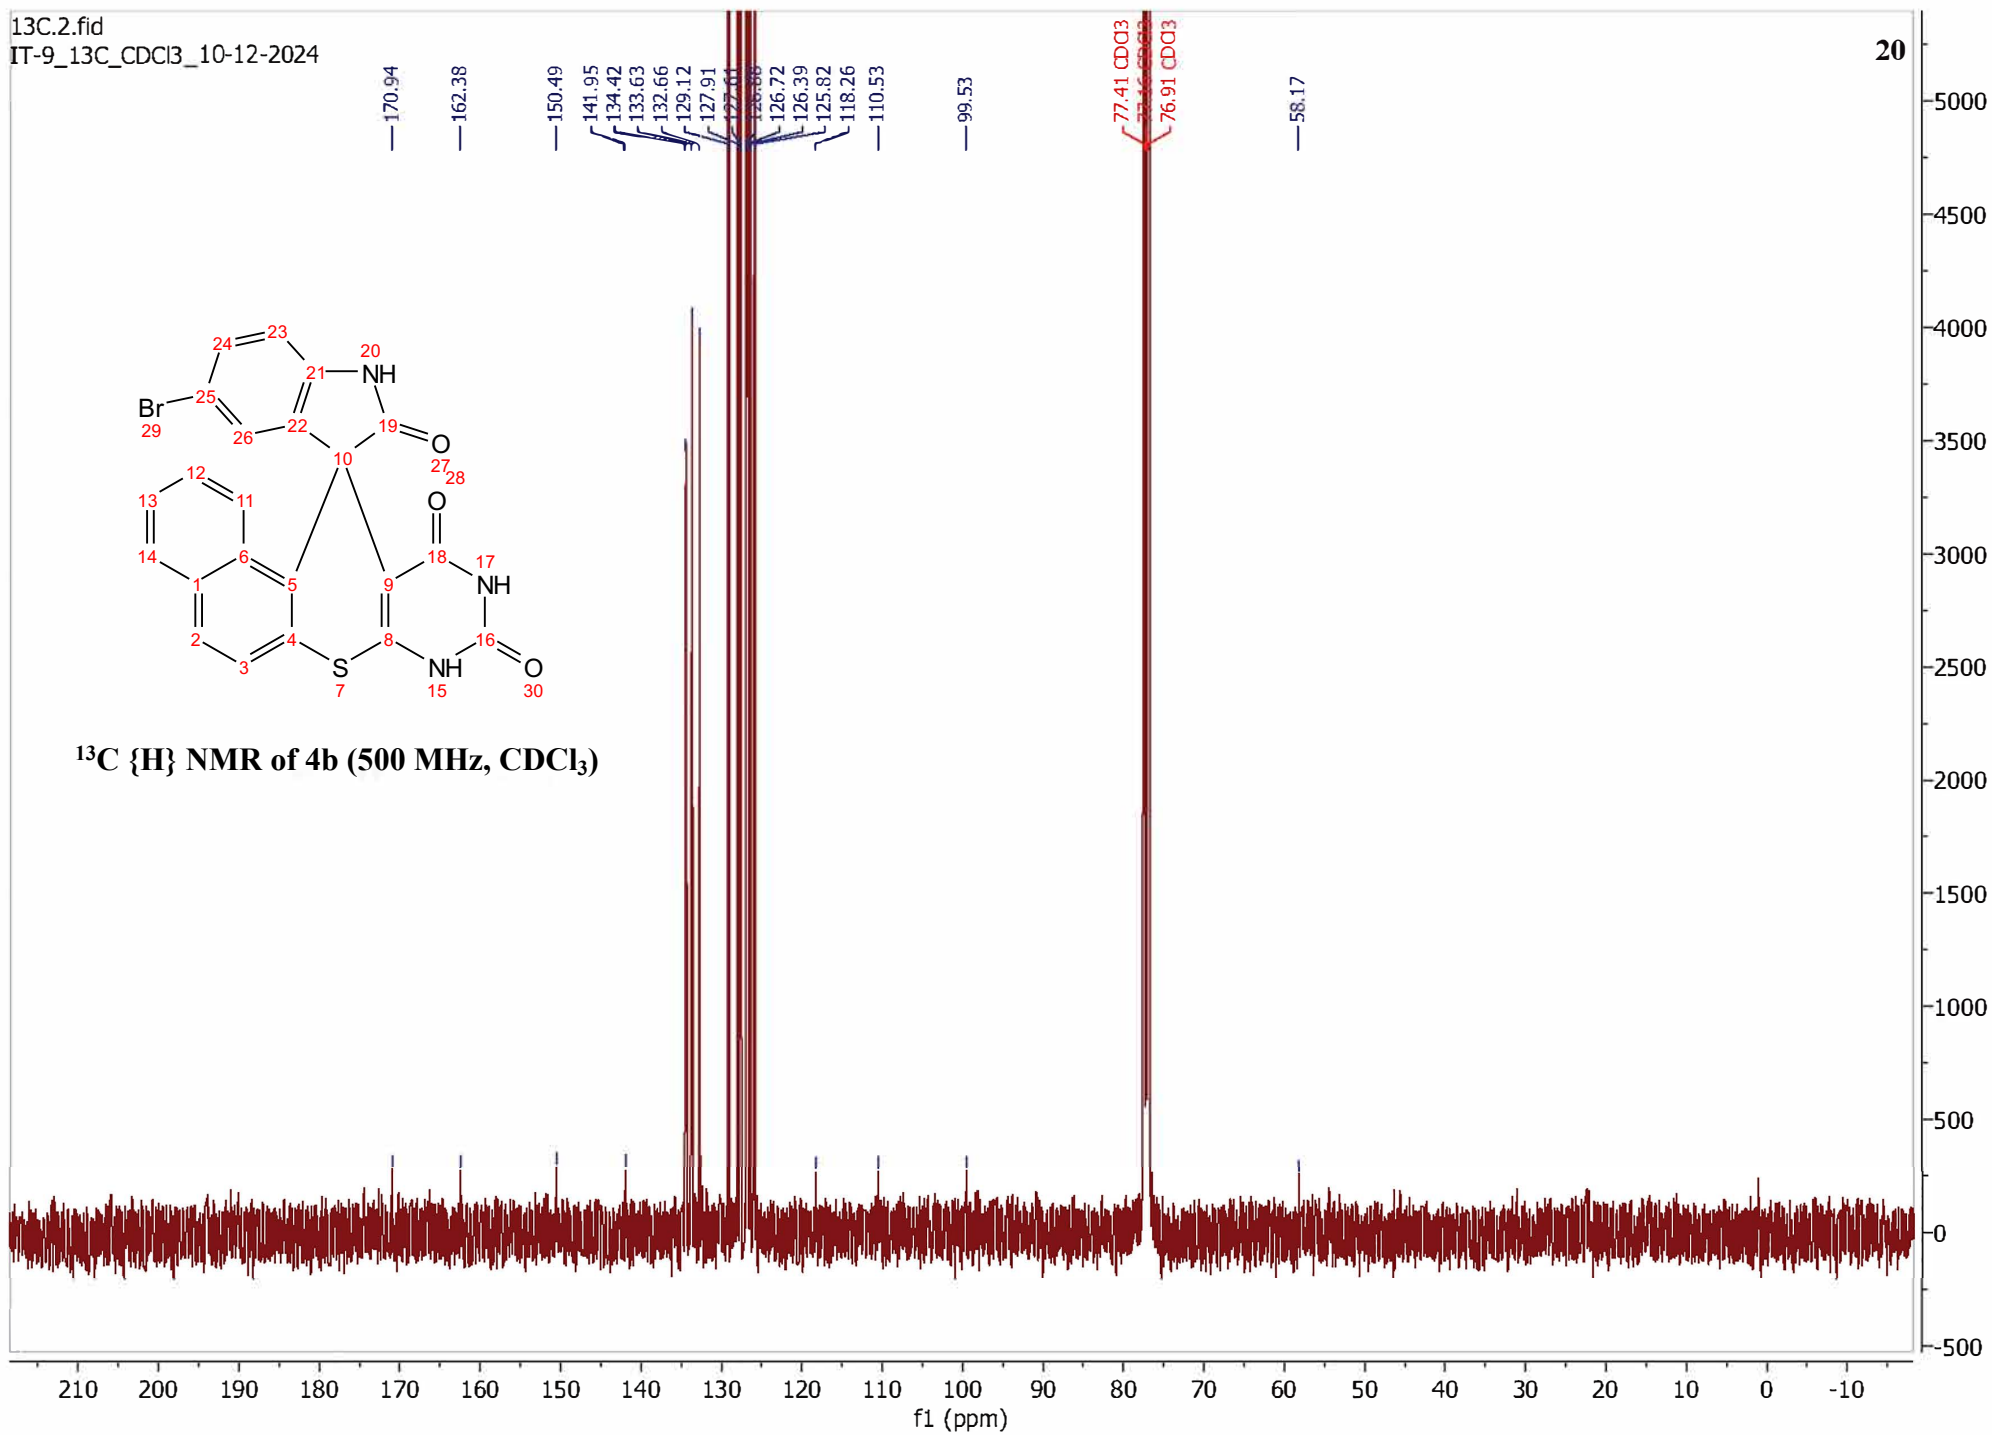

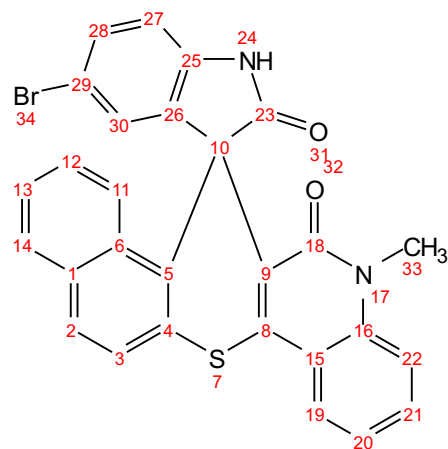

<sup>1</sup>H NMR of 4c (500 MHz, CDCl<sub>3</sub>)

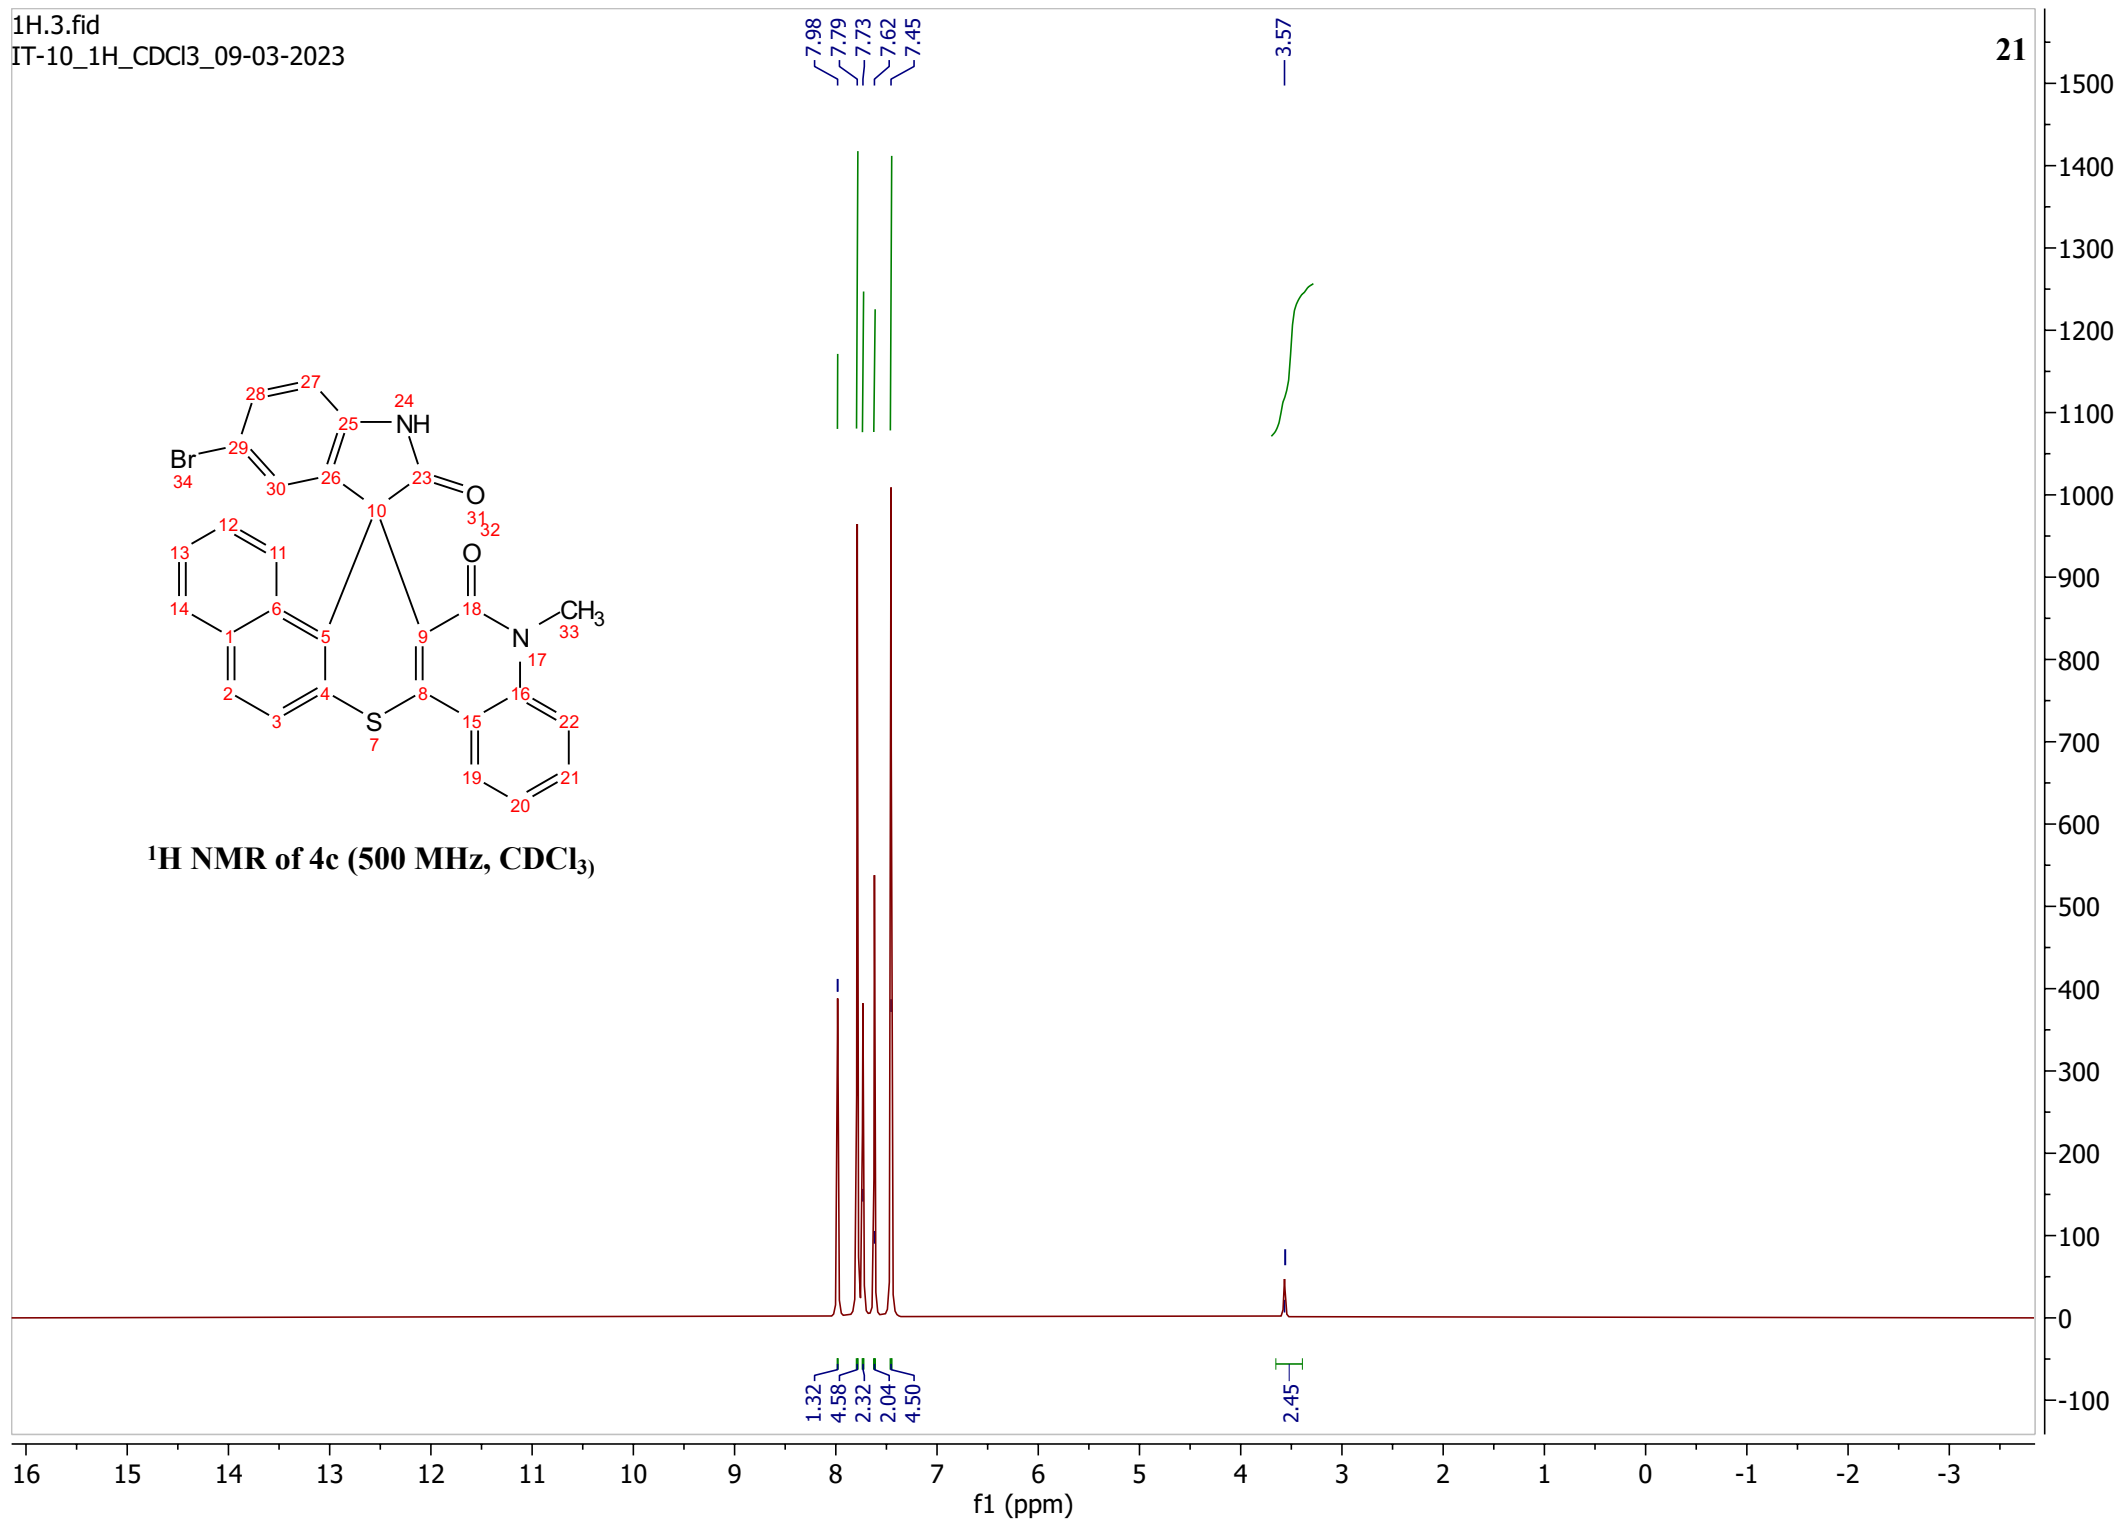

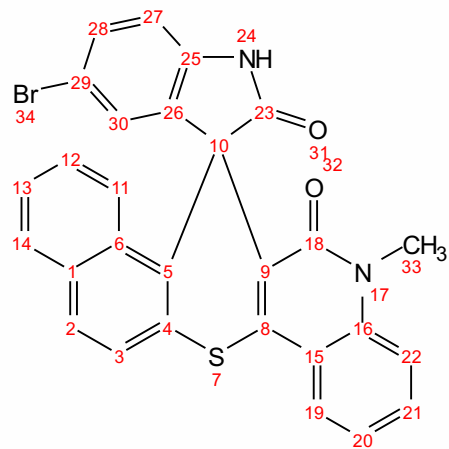

<sup>13</sup>C {H} NMR of 4c (500 MHz, CDCl<sub>3</sub>)

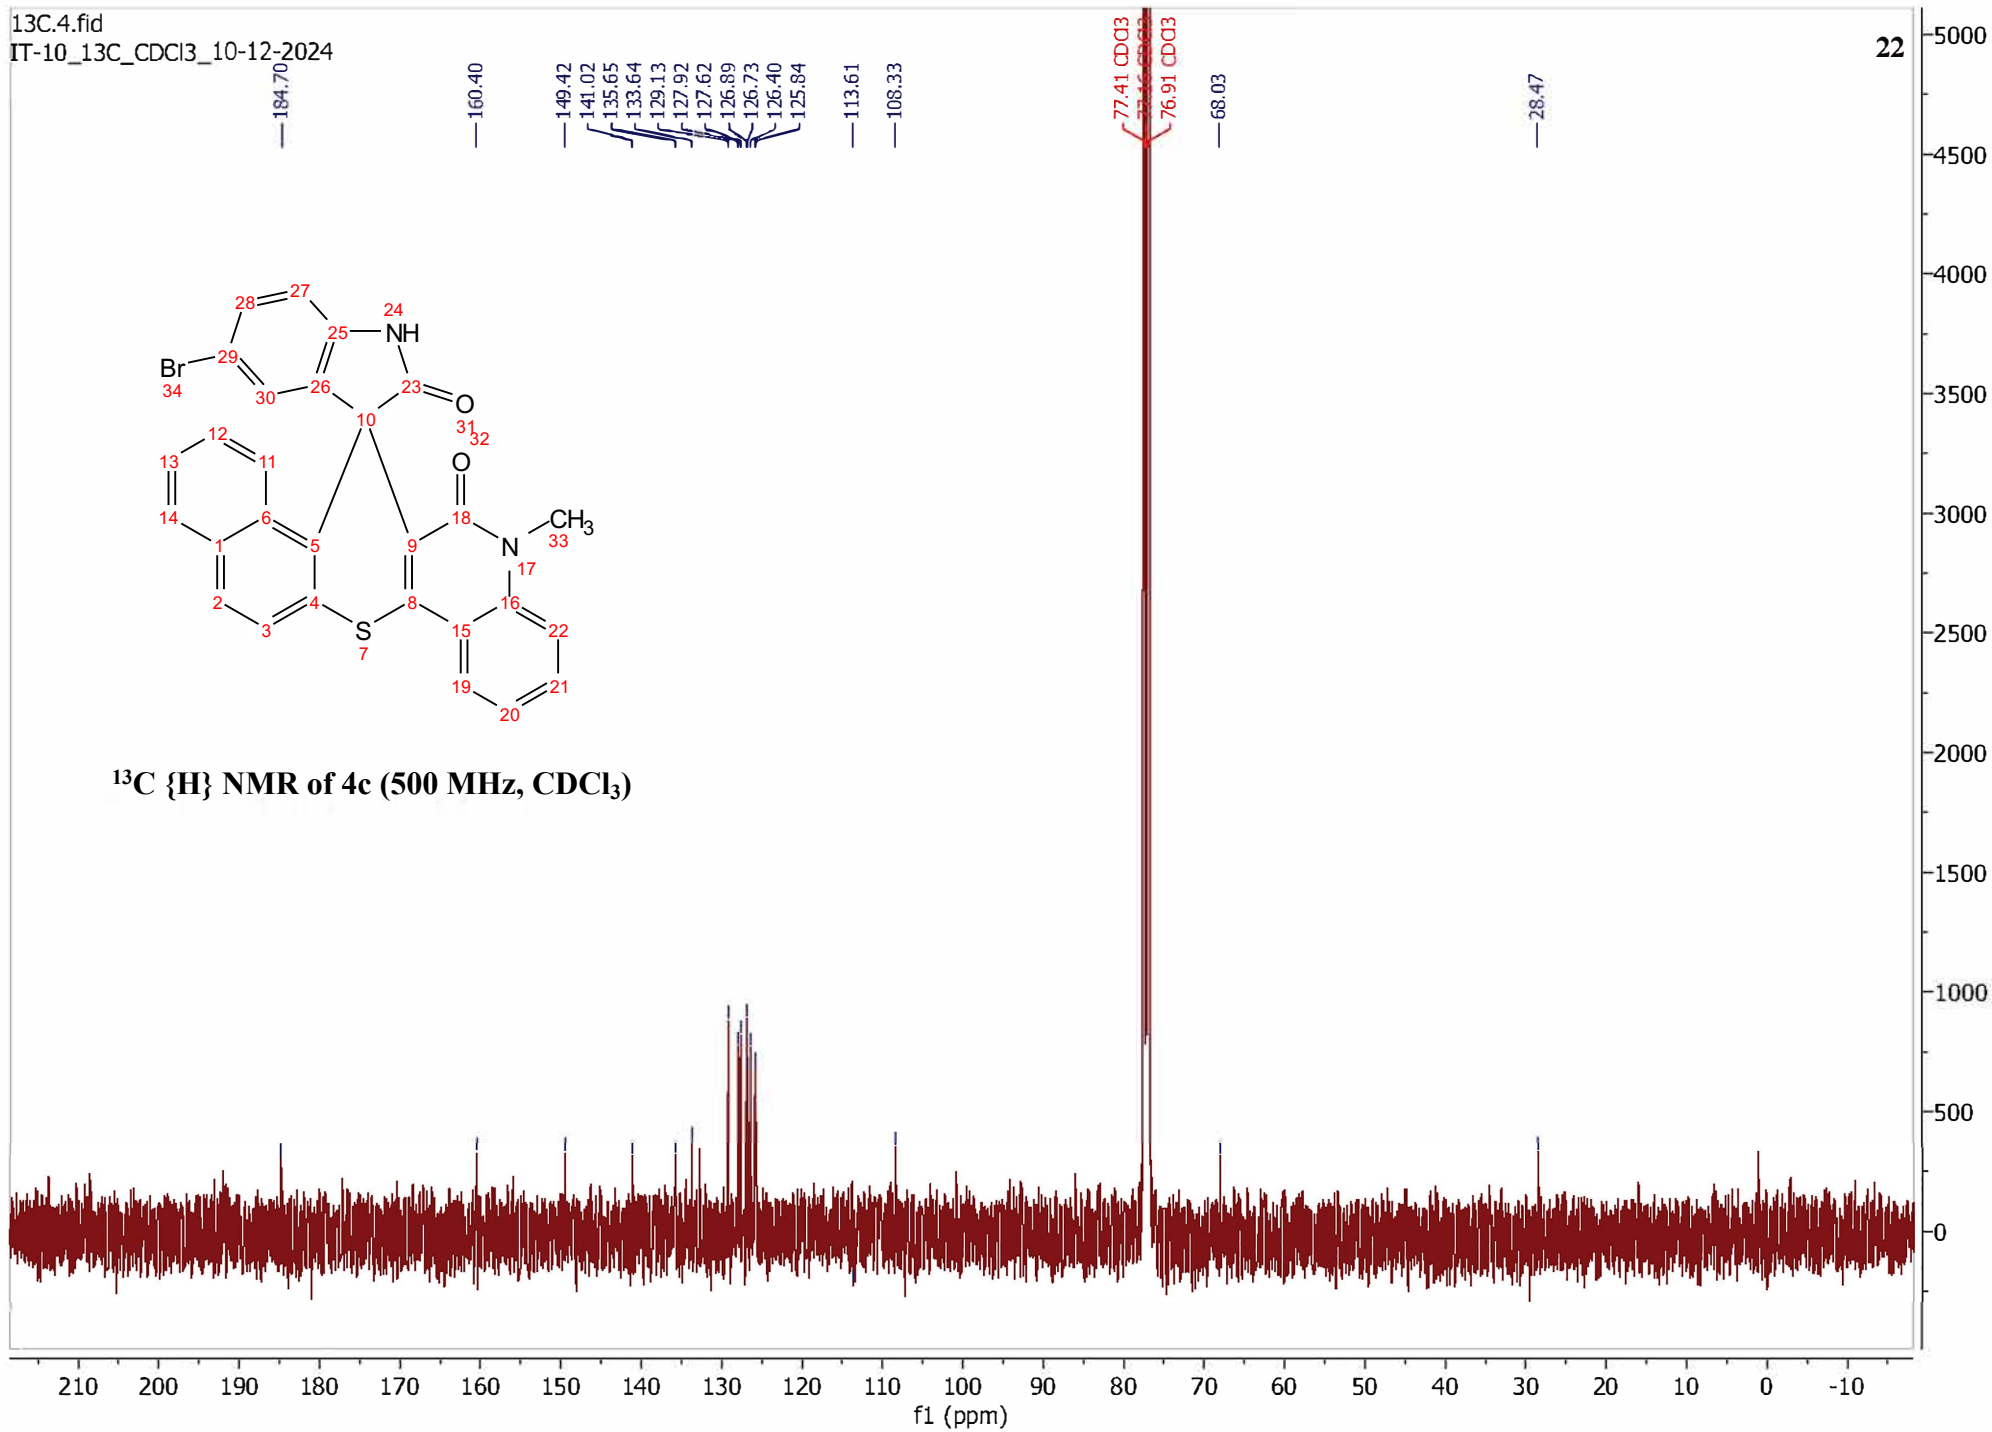



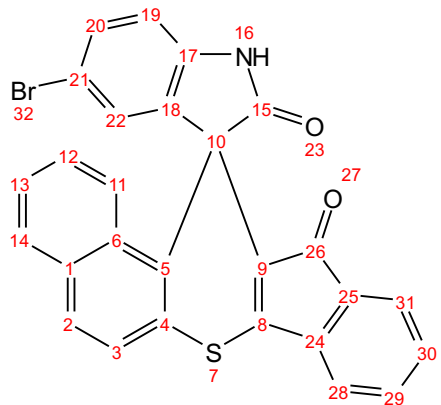

<sup>1</sup>H NMR of 4d (500 MHz, CDCl<sub>3</sub>)

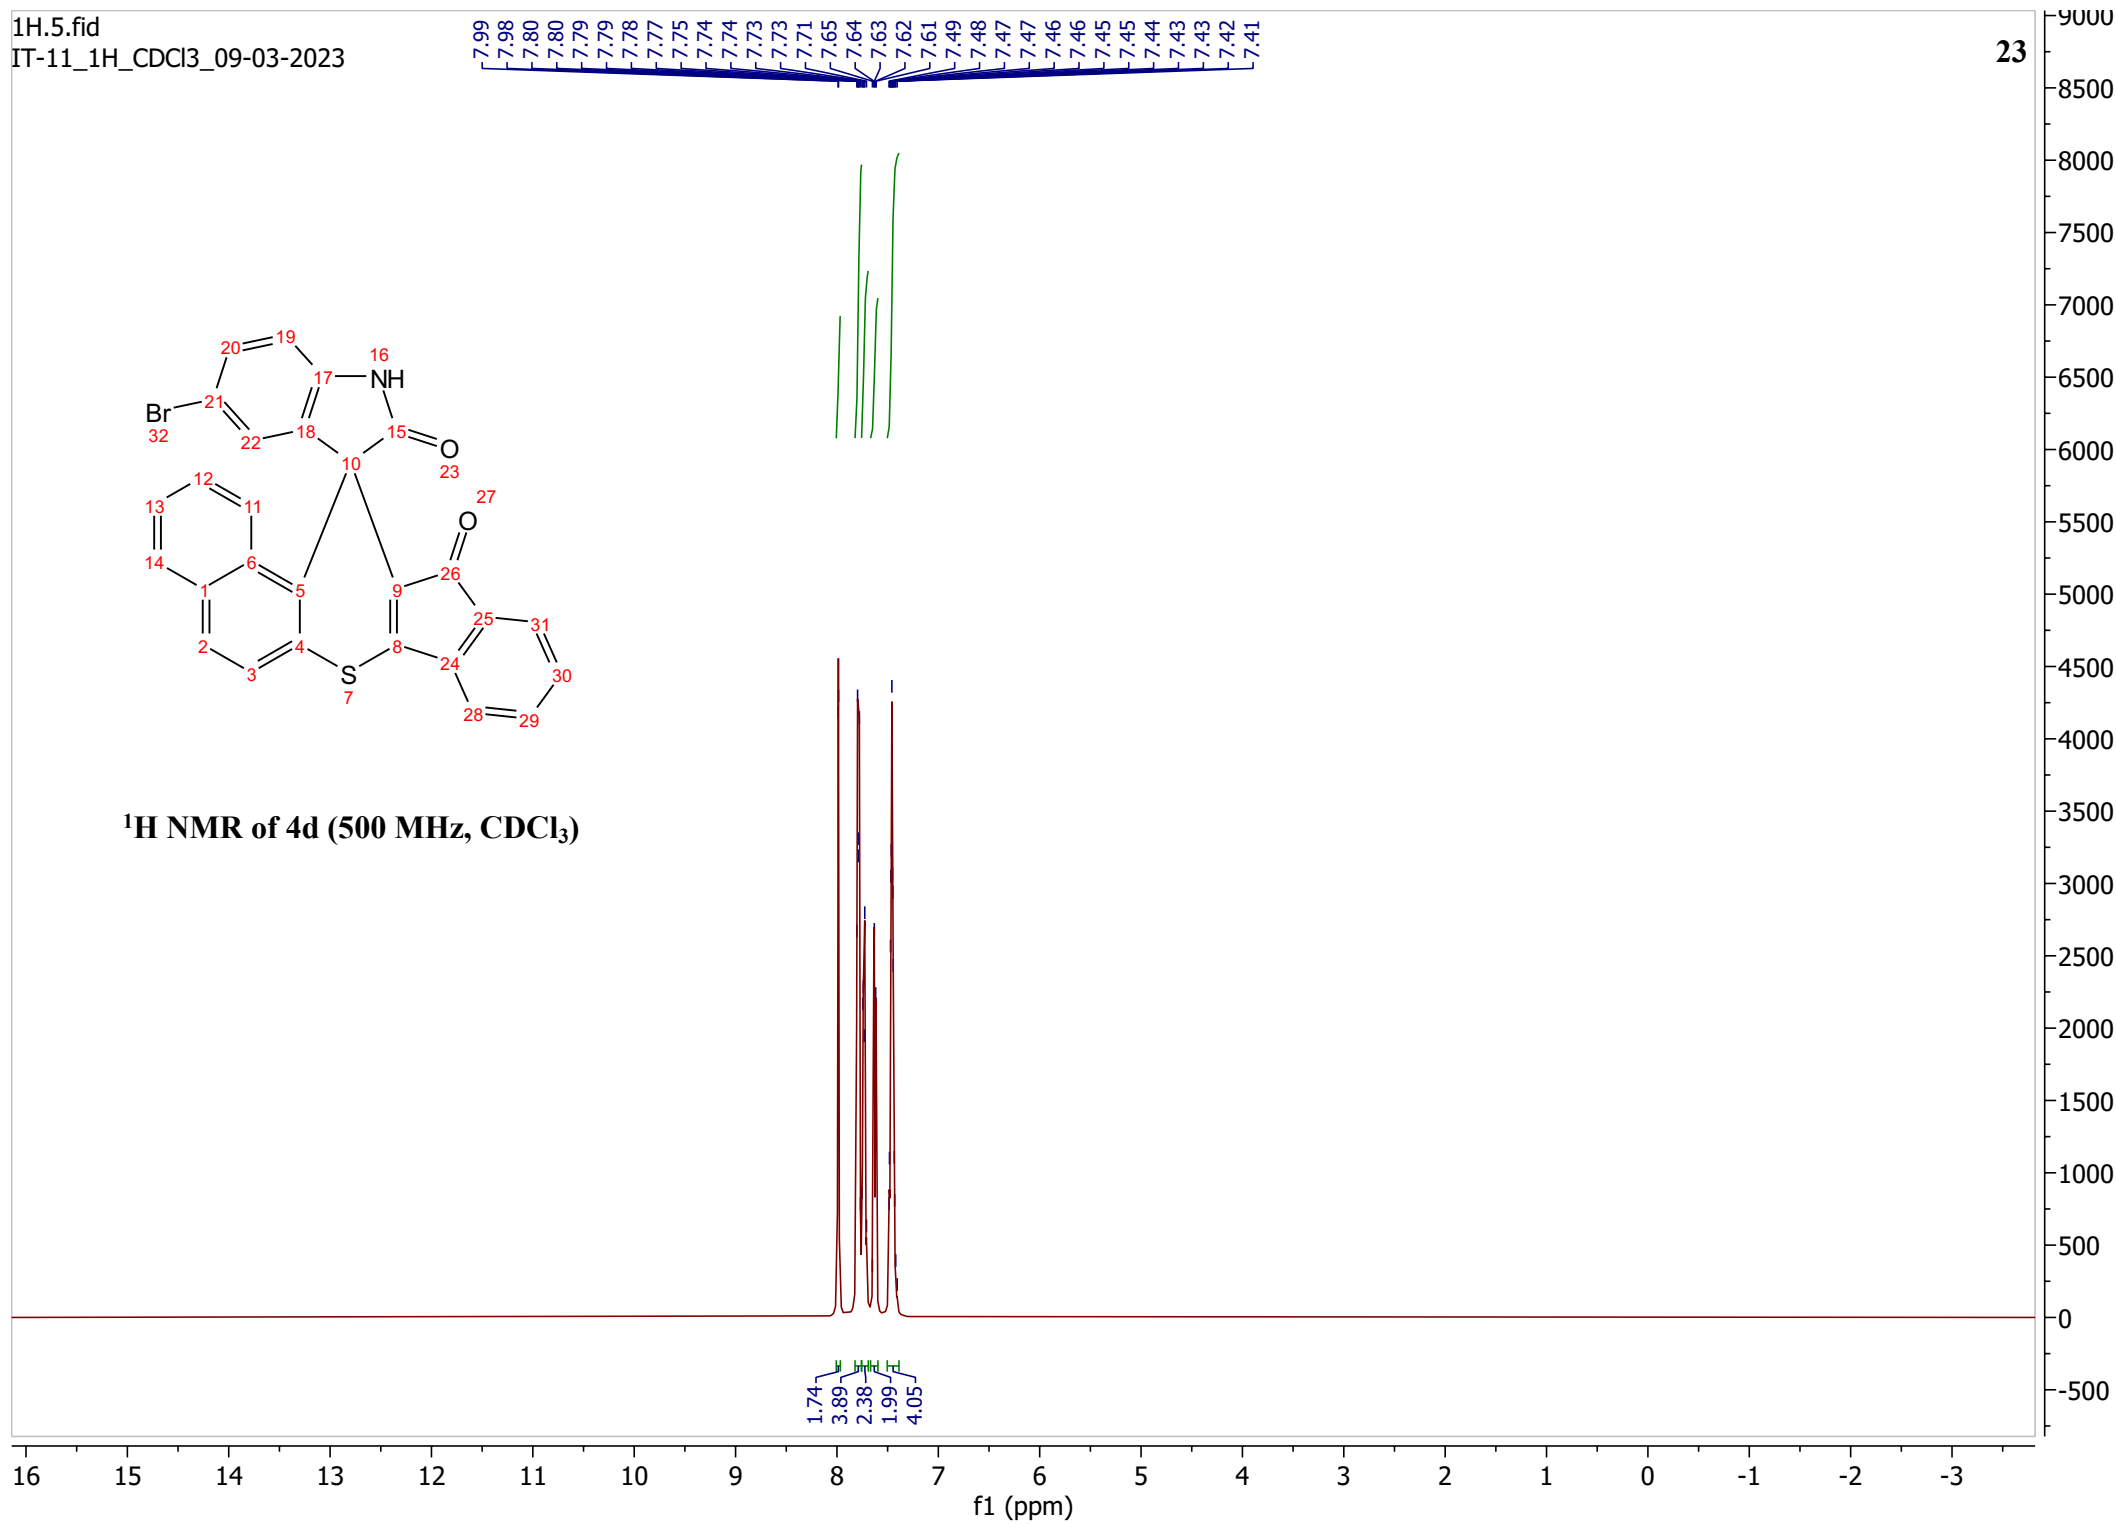

13C.6.fid  
IT-11\_13C\_CDCl3\_10-12-2024

24

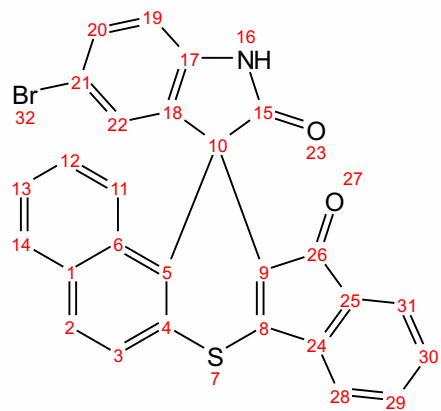

$^{13}\text{C}$  {H} NMR of 4d (500 MHz,  $\text{CDCl}_3$ )

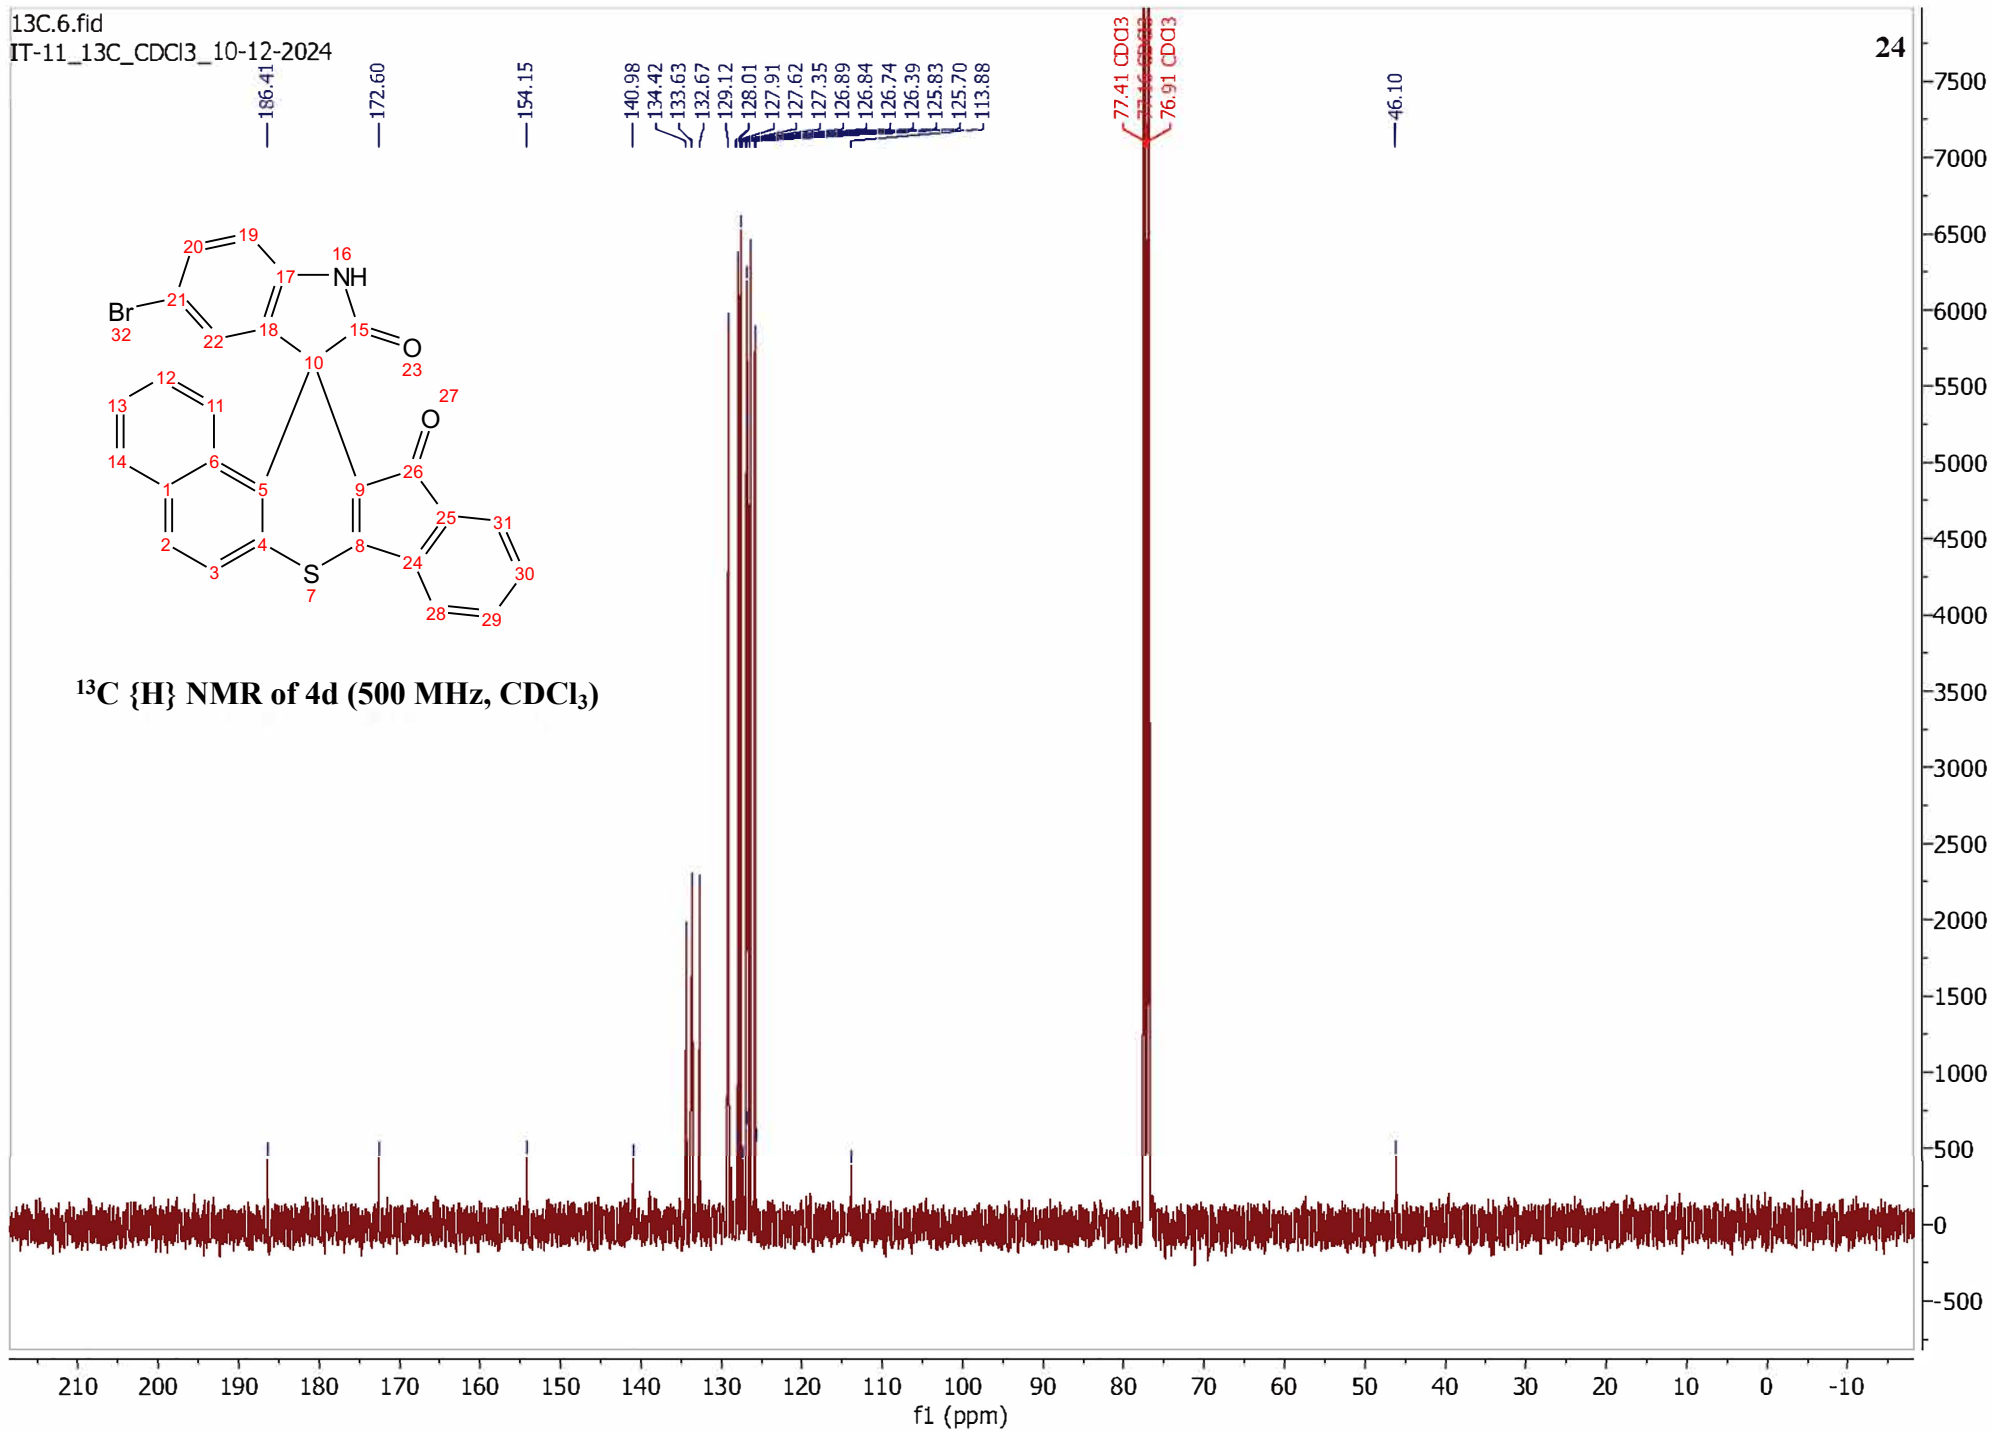

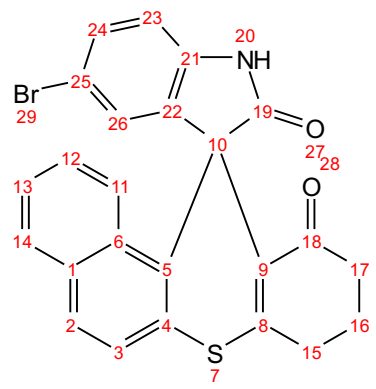

<sup>1</sup>H NMR of 4e (500 MHz, CDCl<sub>3</sub>)

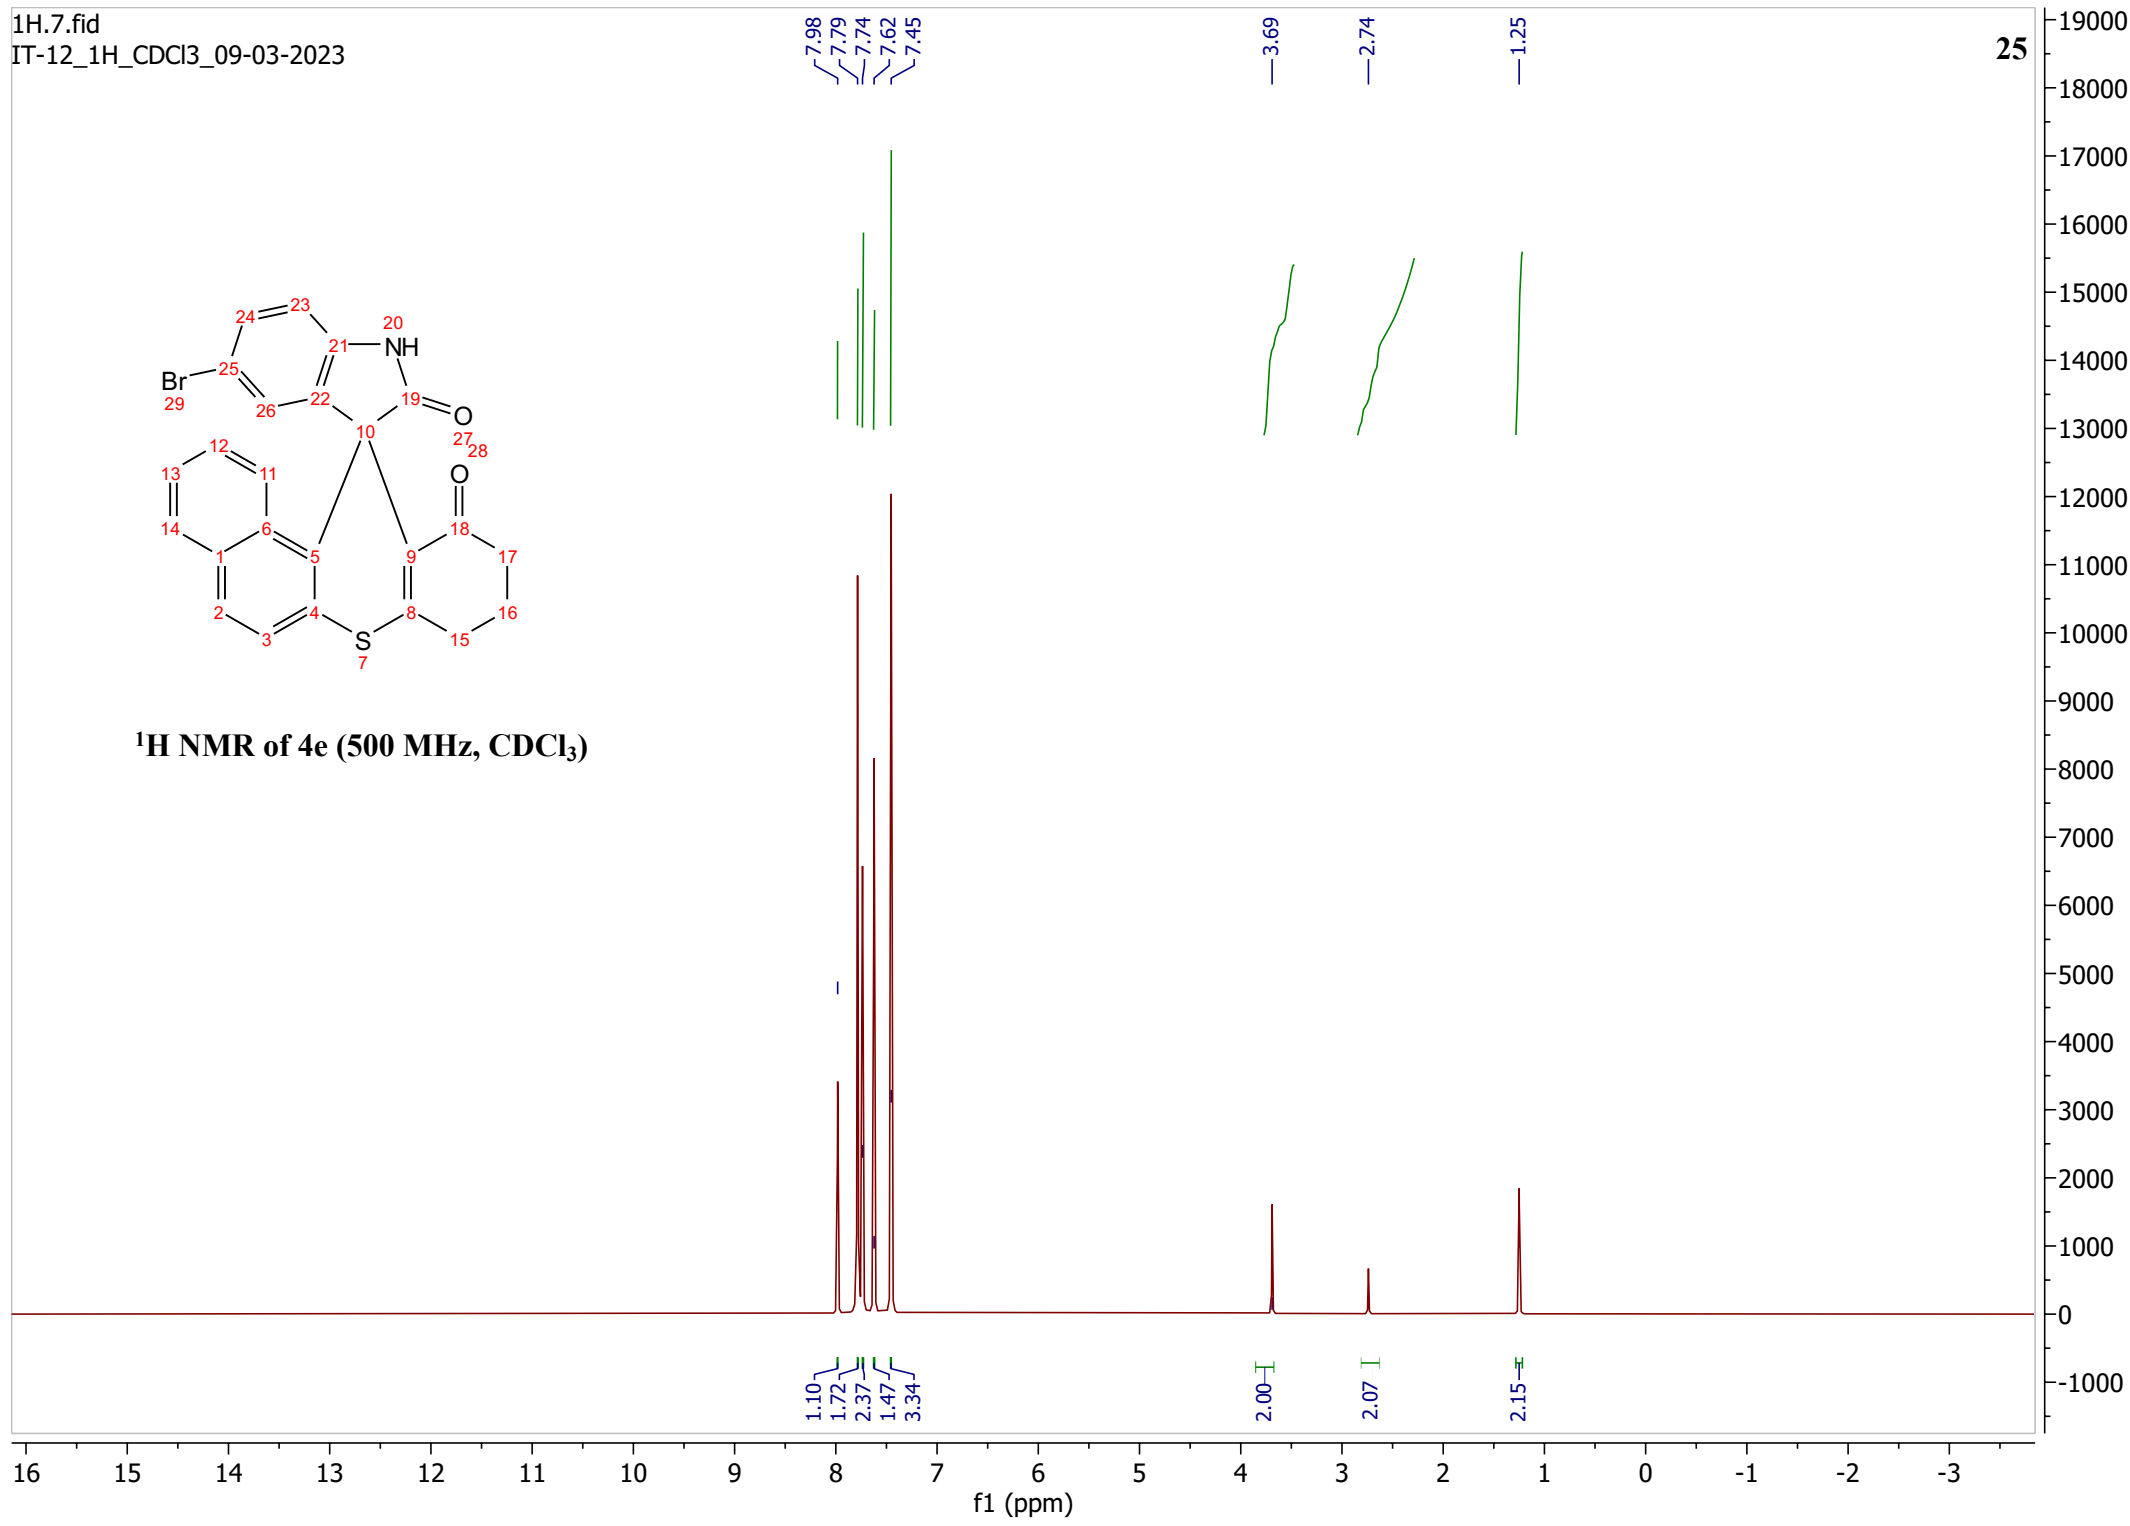

13C.8.fid  
IT-12\_13C\_CDCl3\_10-12-2024

26

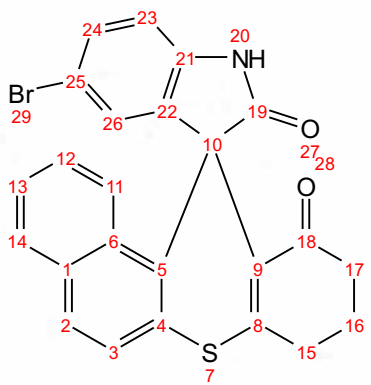

$^{13}\text{C} \{^1\text{H}\}$  NMR of 4e (500 MHz,  $\text{CDCl}_3$ )

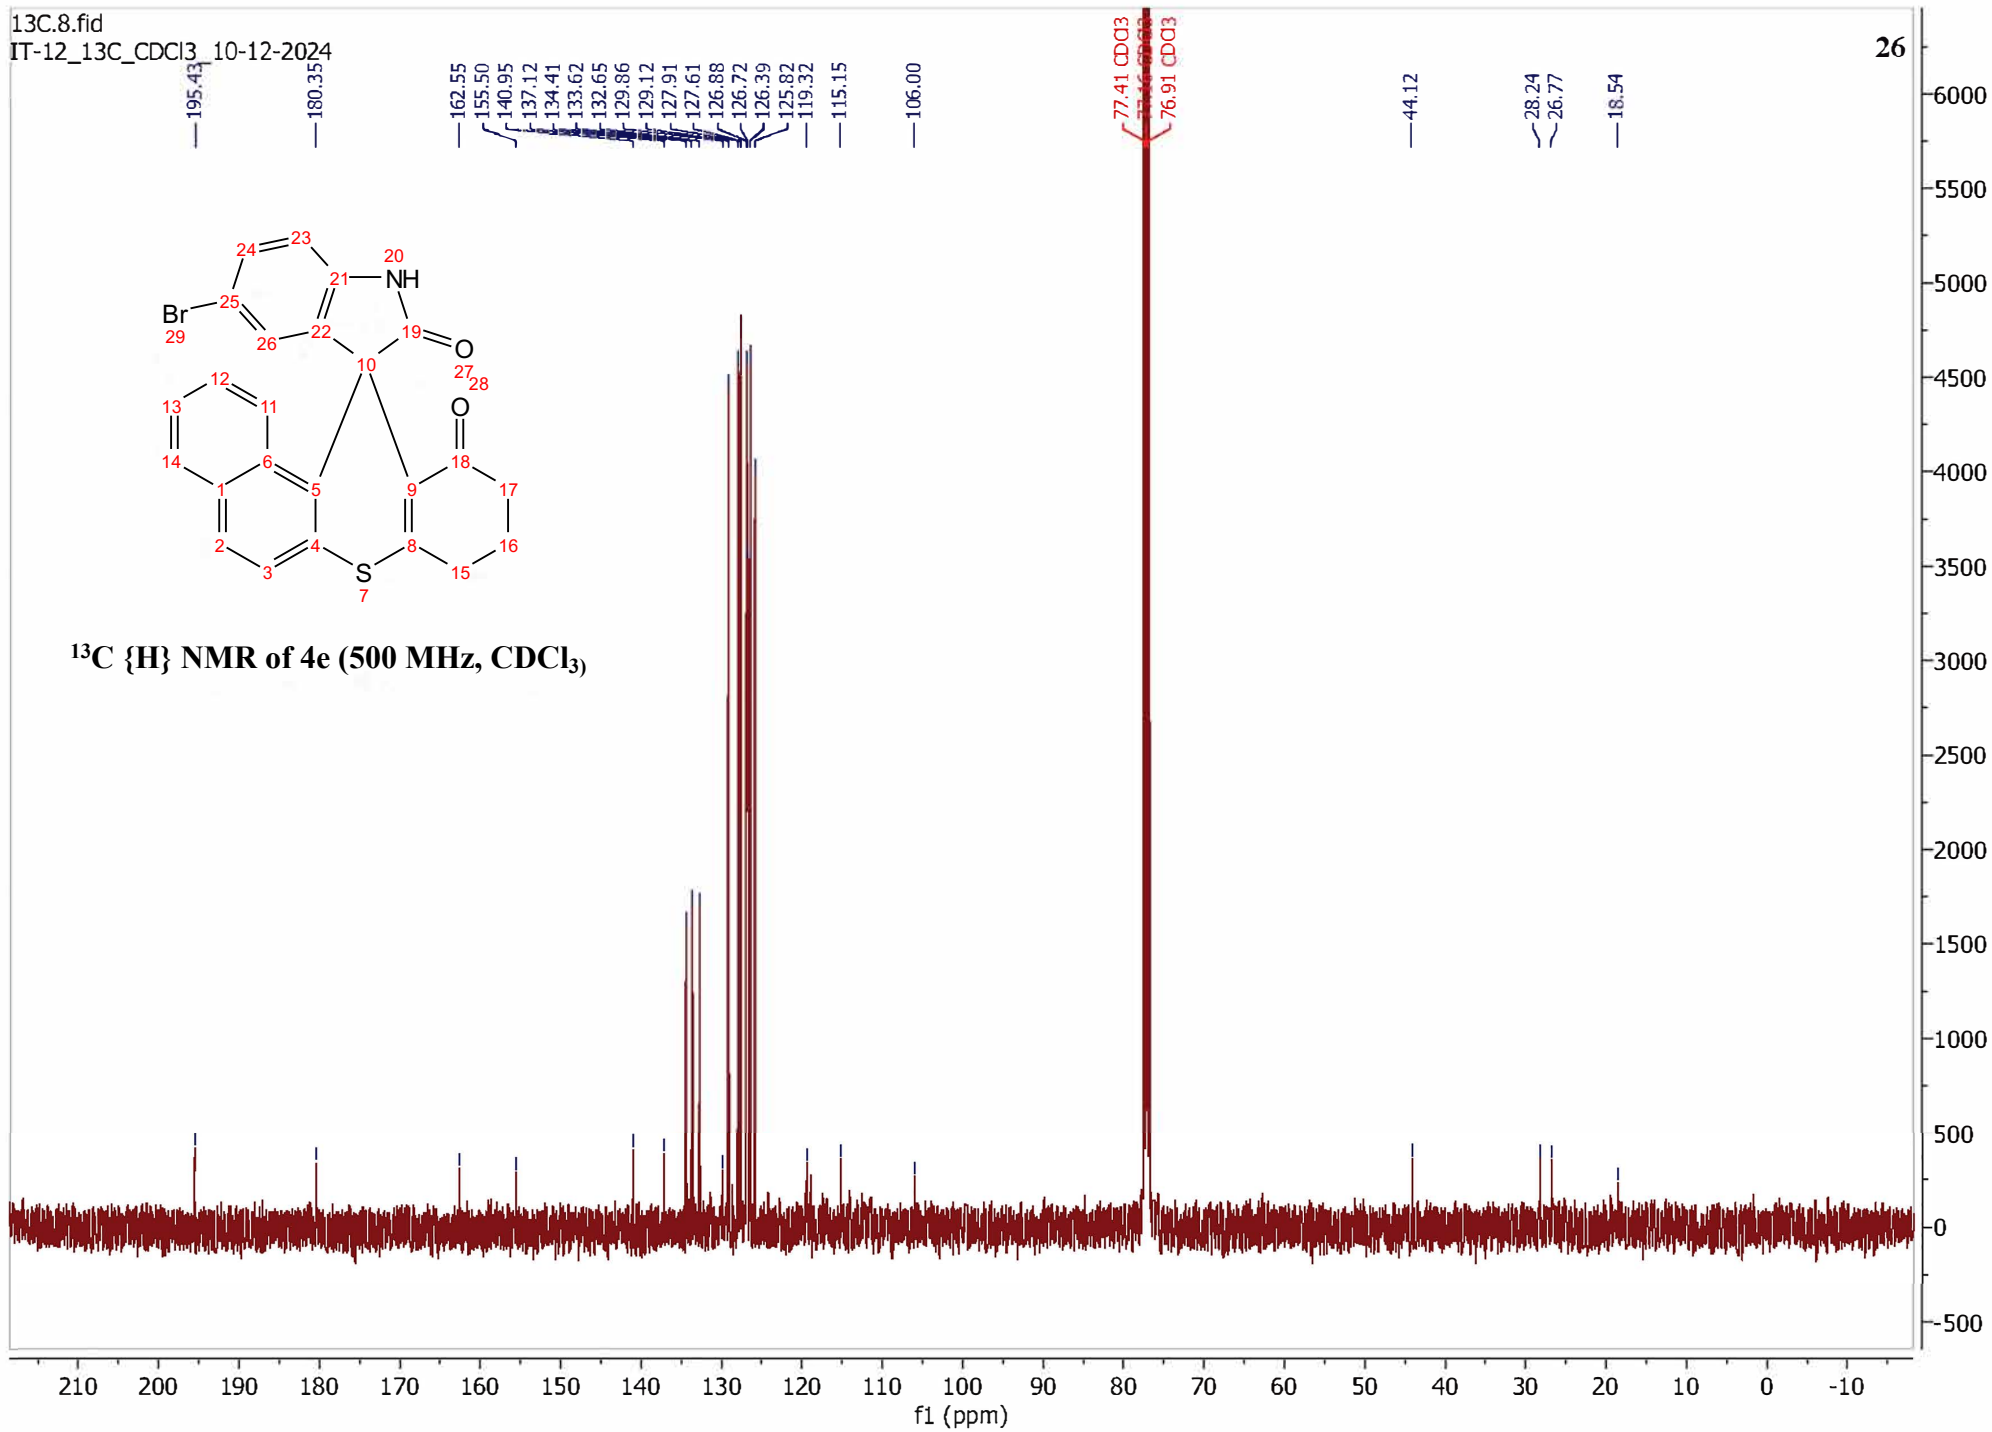

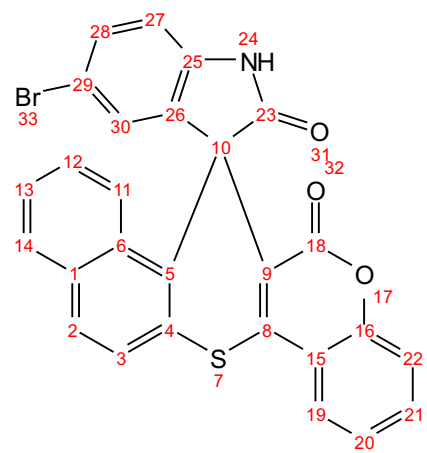

<sup>1</sup>H NMR of 4f (500 MHz, CDCl<sub>3</sub>)

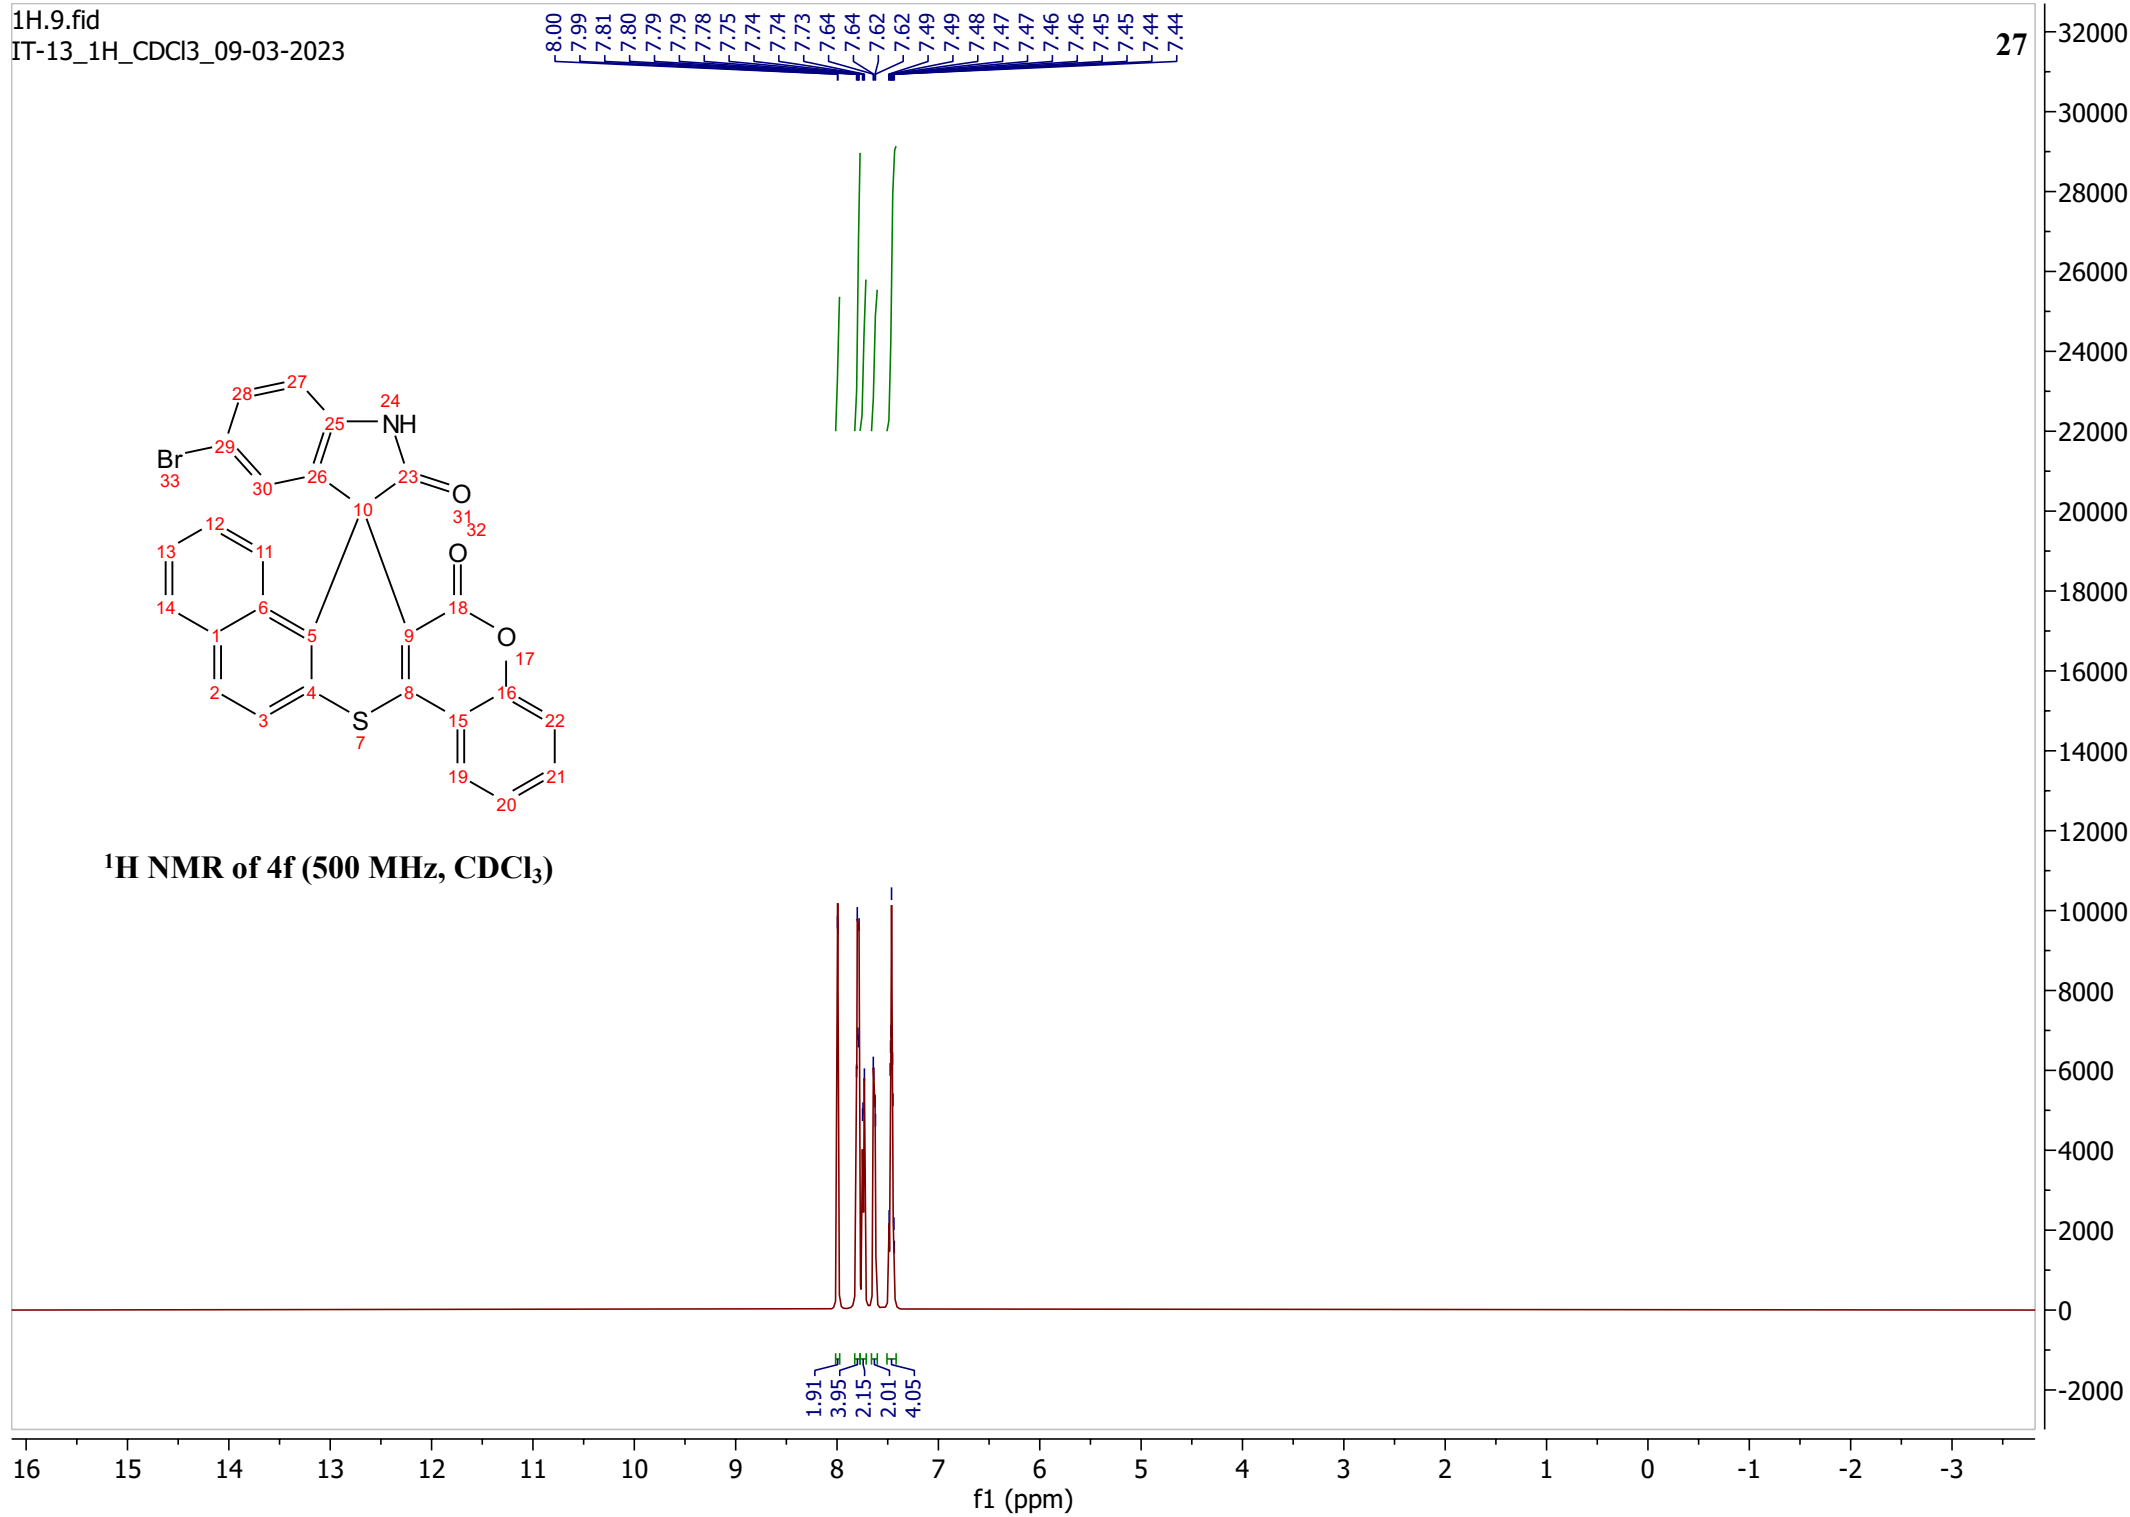

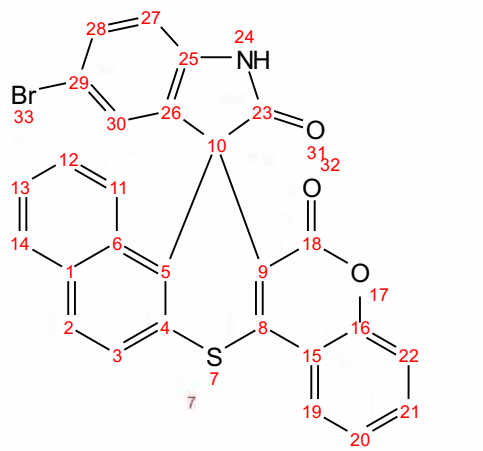

<sup>13</sup>C {H} NMR of 4f (500 MHz, CDCl<sub>3</sub>)

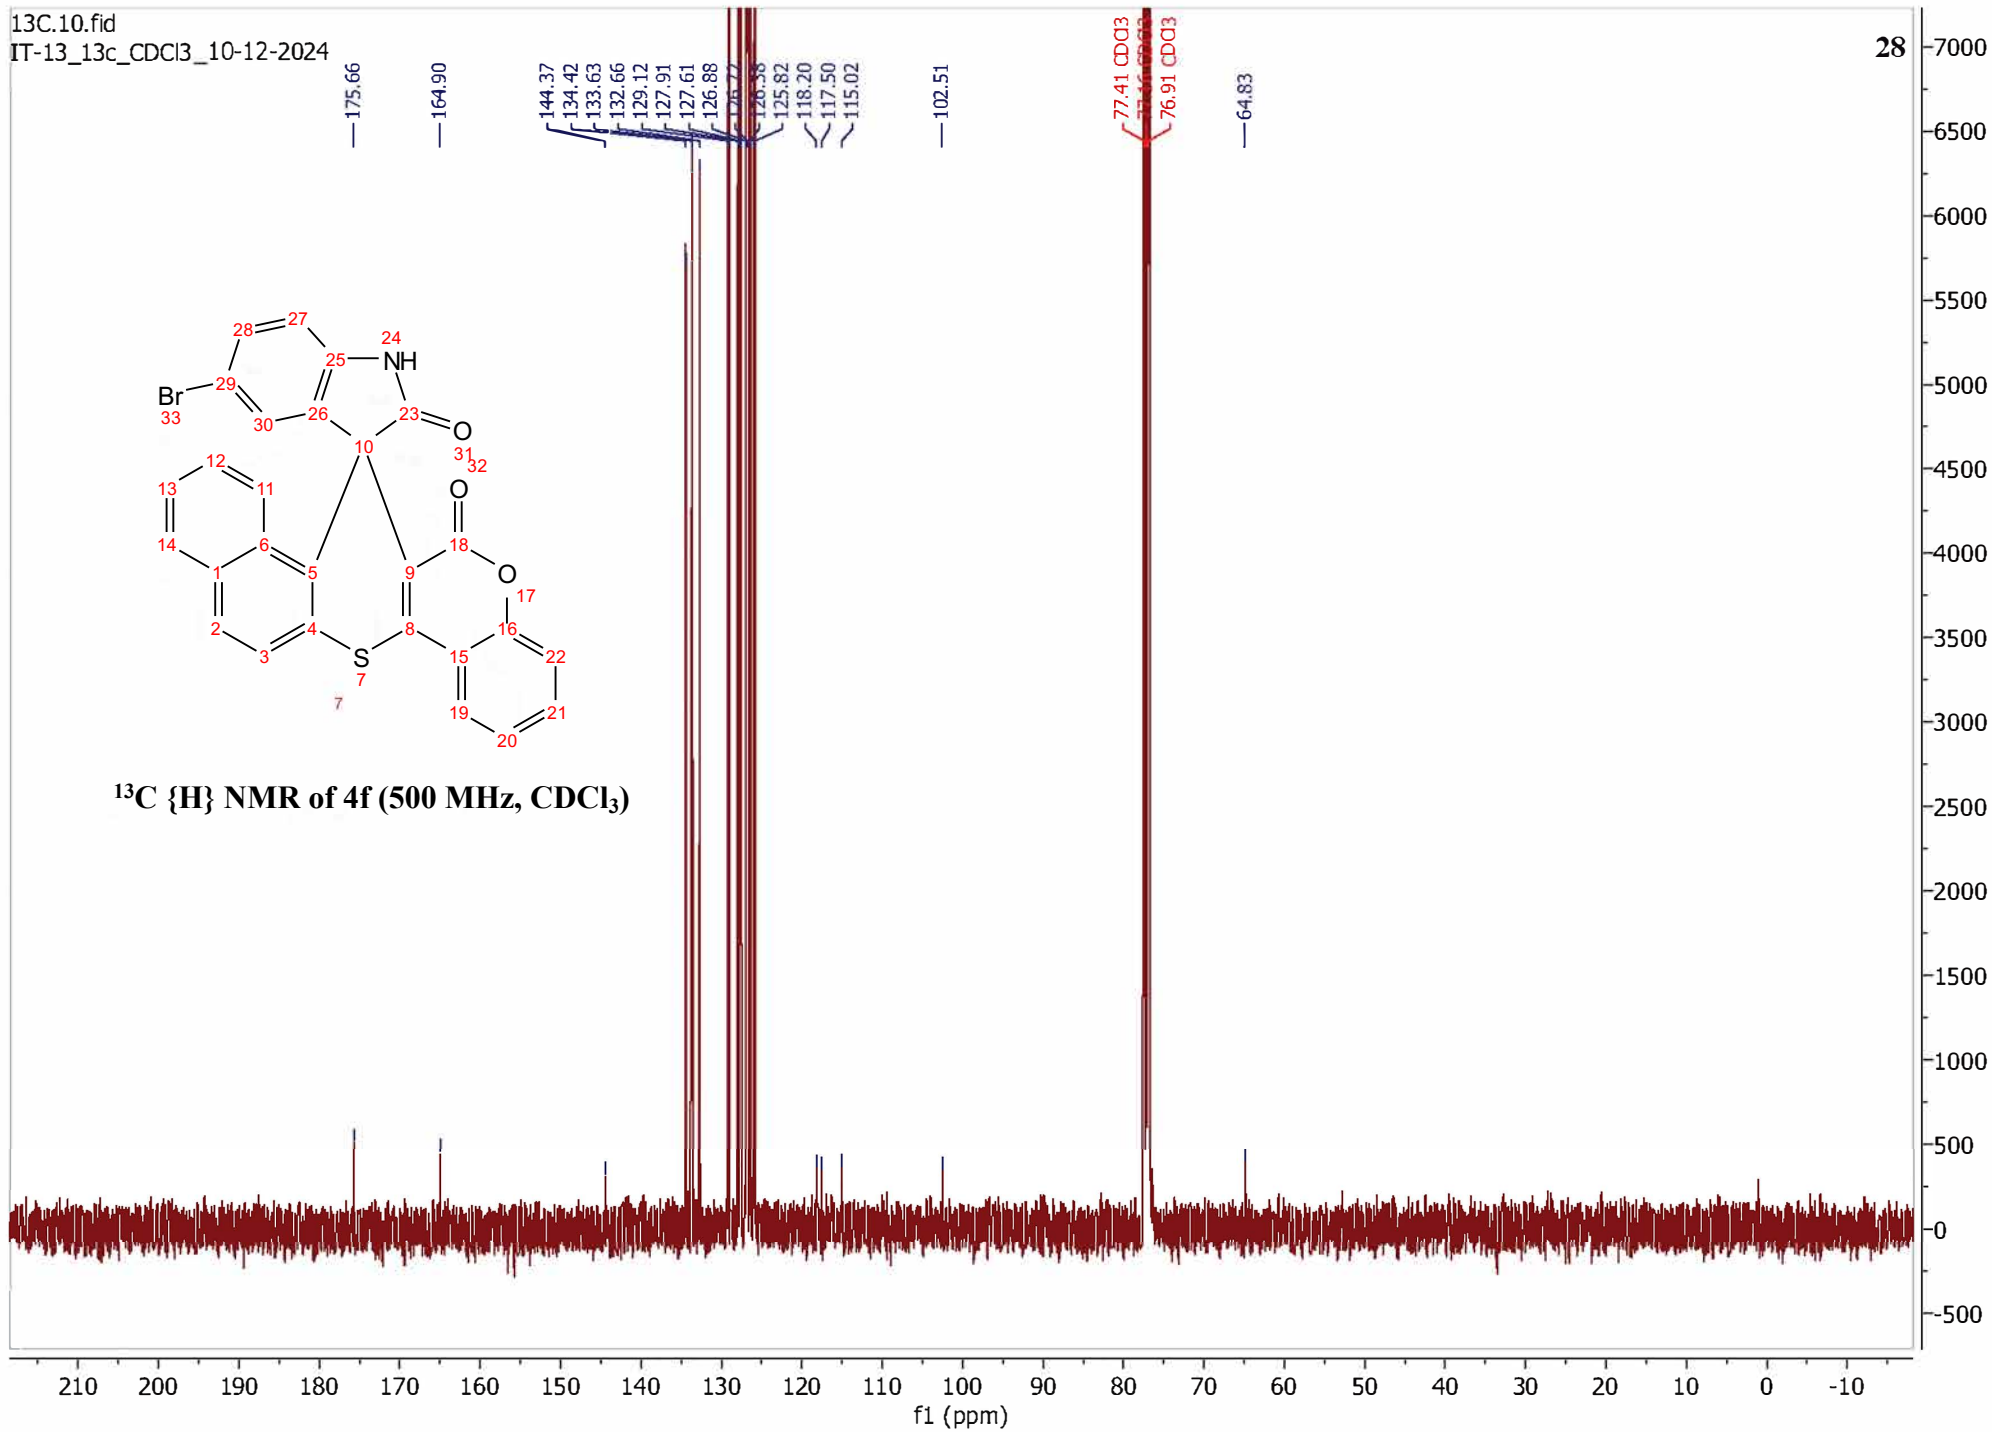

RU-IT-1  
single\_pulse

29

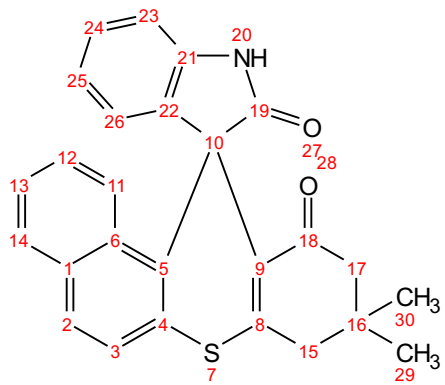

<sup>1</sup>H NMR of 4g (500 MHz, CDCl<sub>3</sub>)

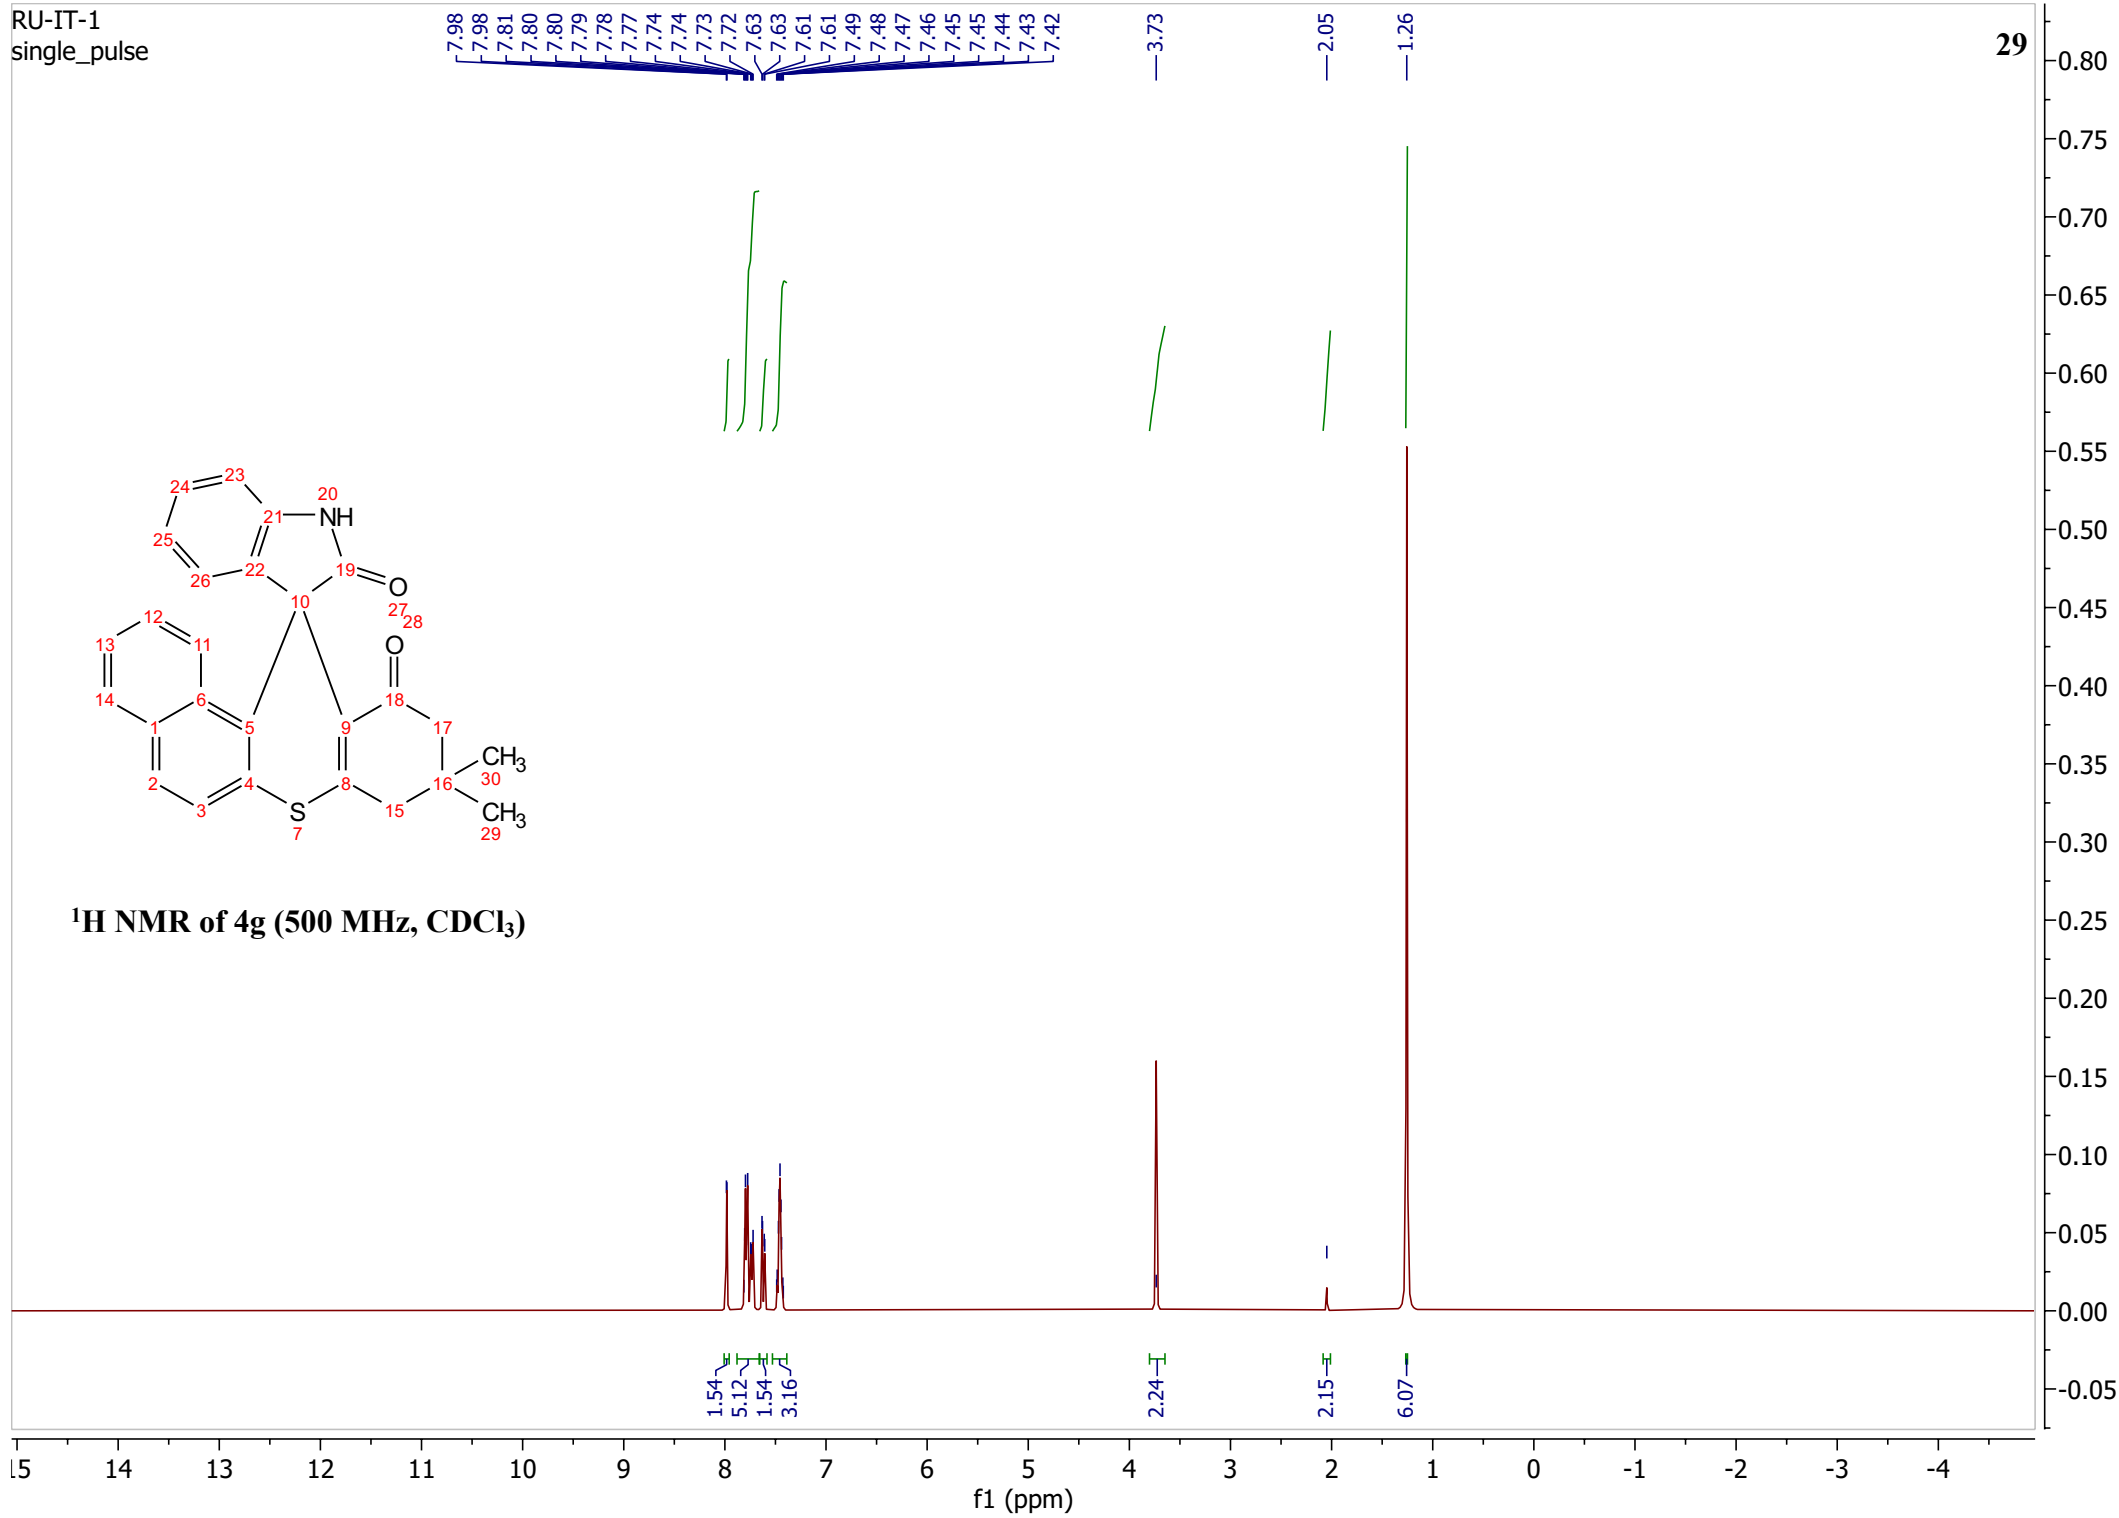



RU-IT-1  
single pulse decoupled gated NOE

30

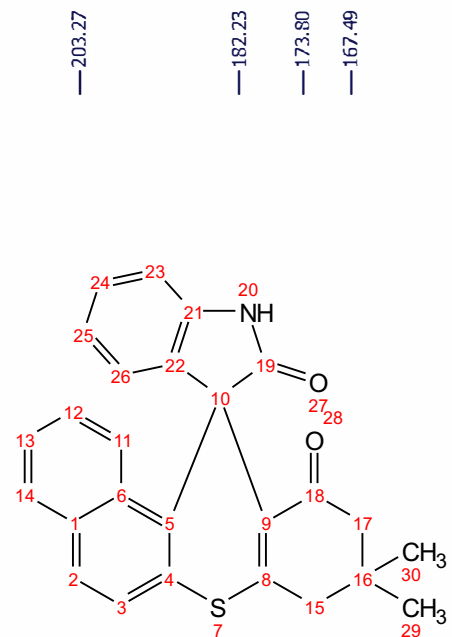

<sup>13</sup>C {<sup>1</sup>H} NMR of 4g (500 MHz, CDCl<sub>3</sub>)

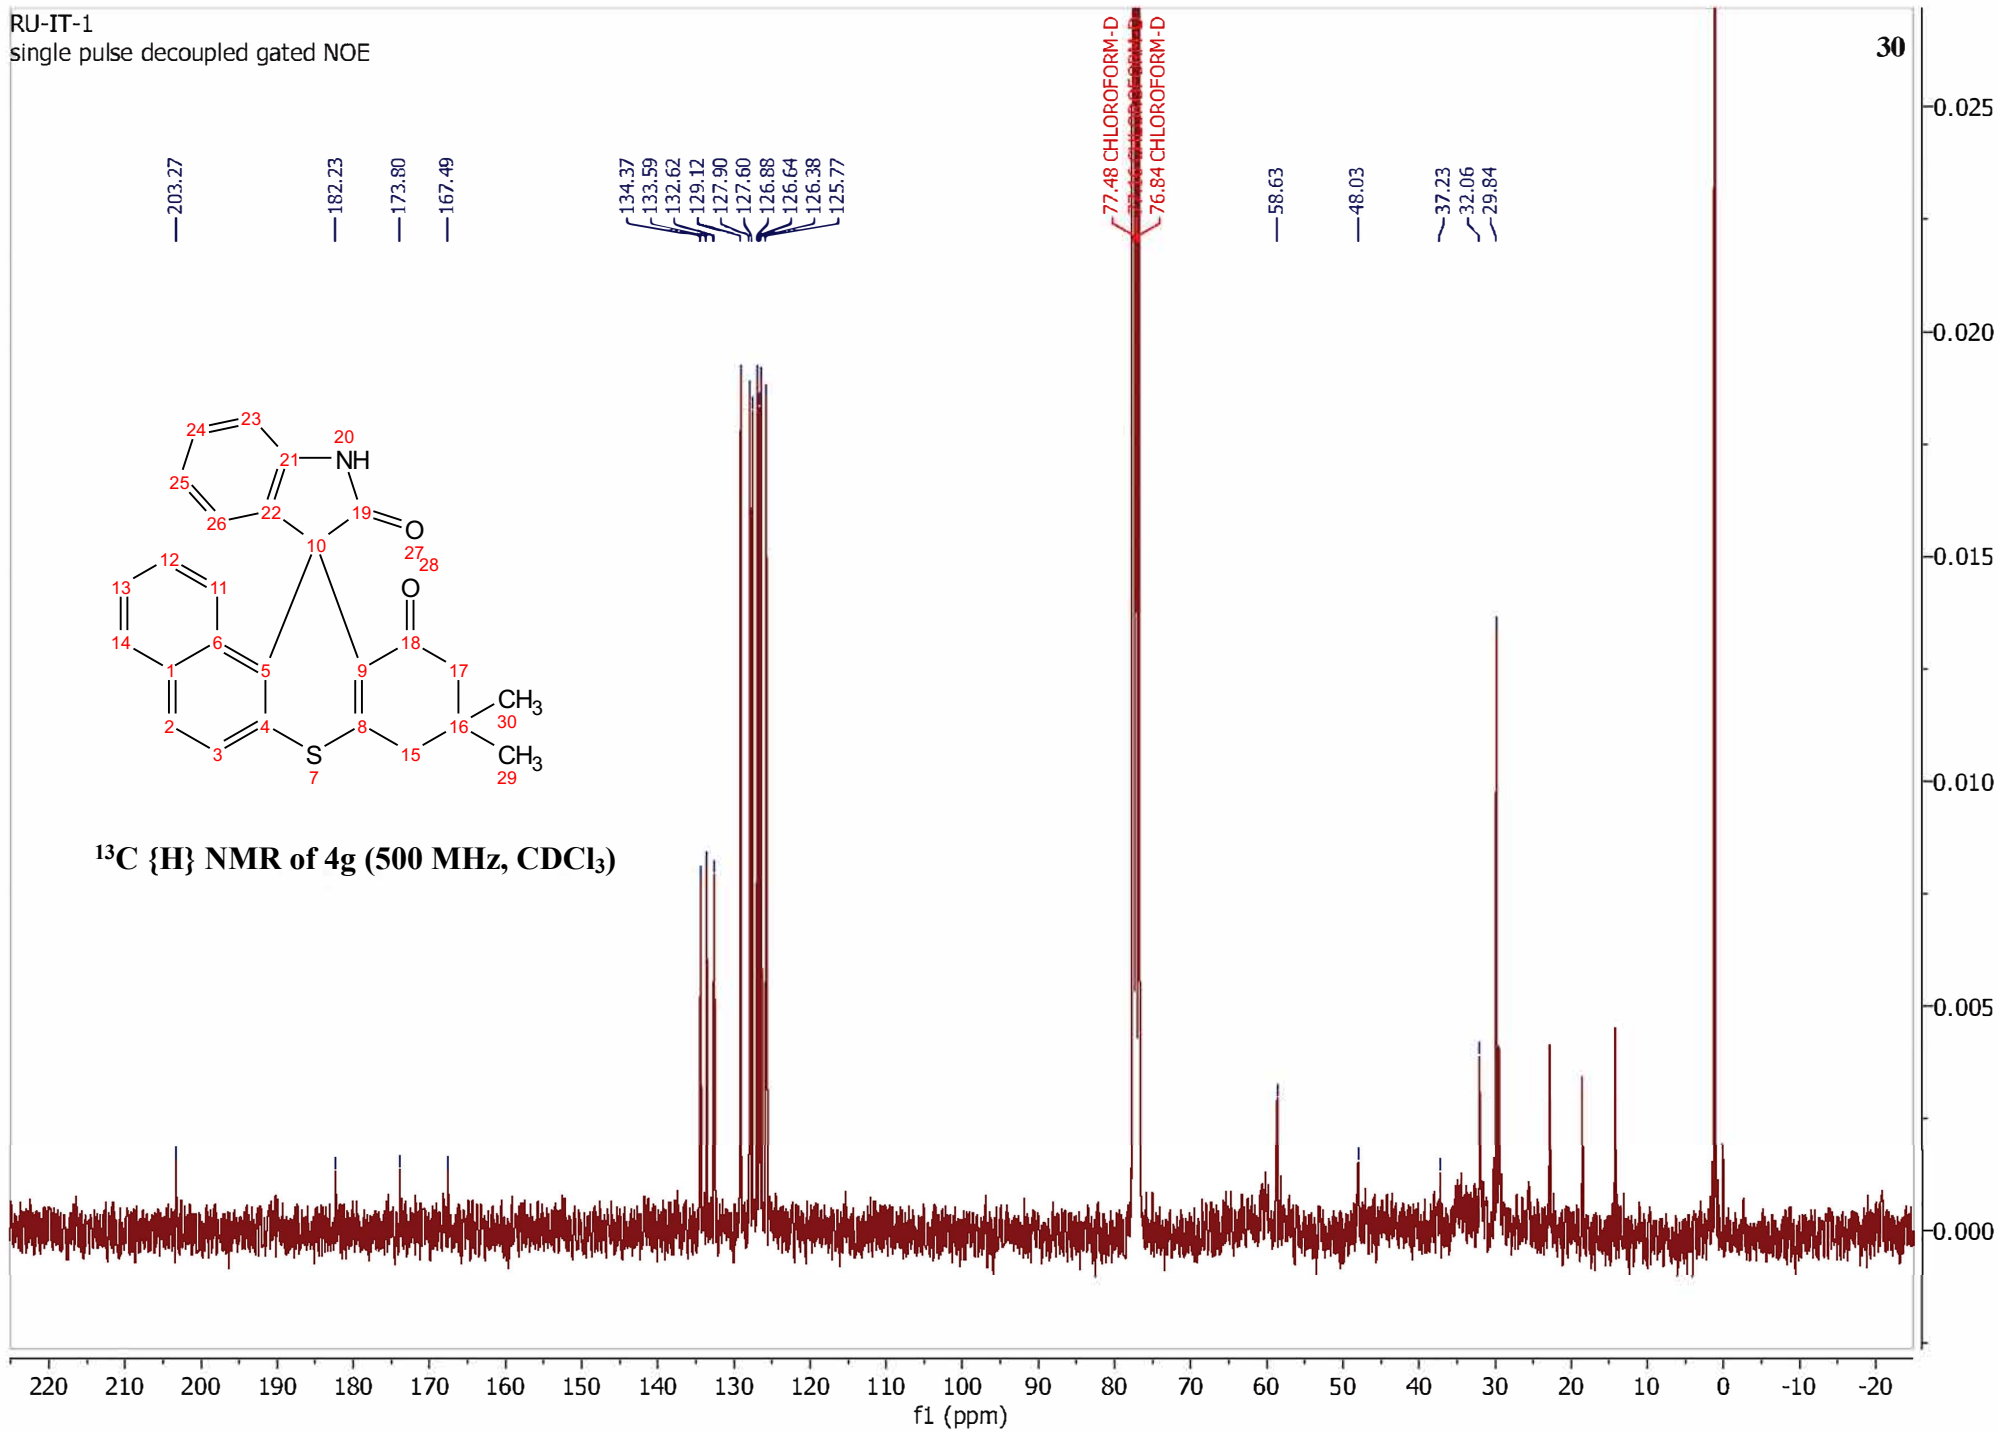

8.00  
7.81  
7.80  
7.79  
7.79  
7.78  
7.75  
7.74  
7.73  
7.65  
7.64  
7.63  
7.63  
7.49  
7.48  
7.47  
7.47  
7.46  
7.46  
7.45  
7.45  
7.44

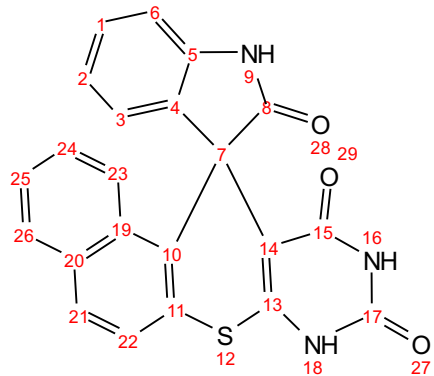

**<sup>1</sup>H NMR of 4h (500 MHz, CDCl<sub>3</sub>)**

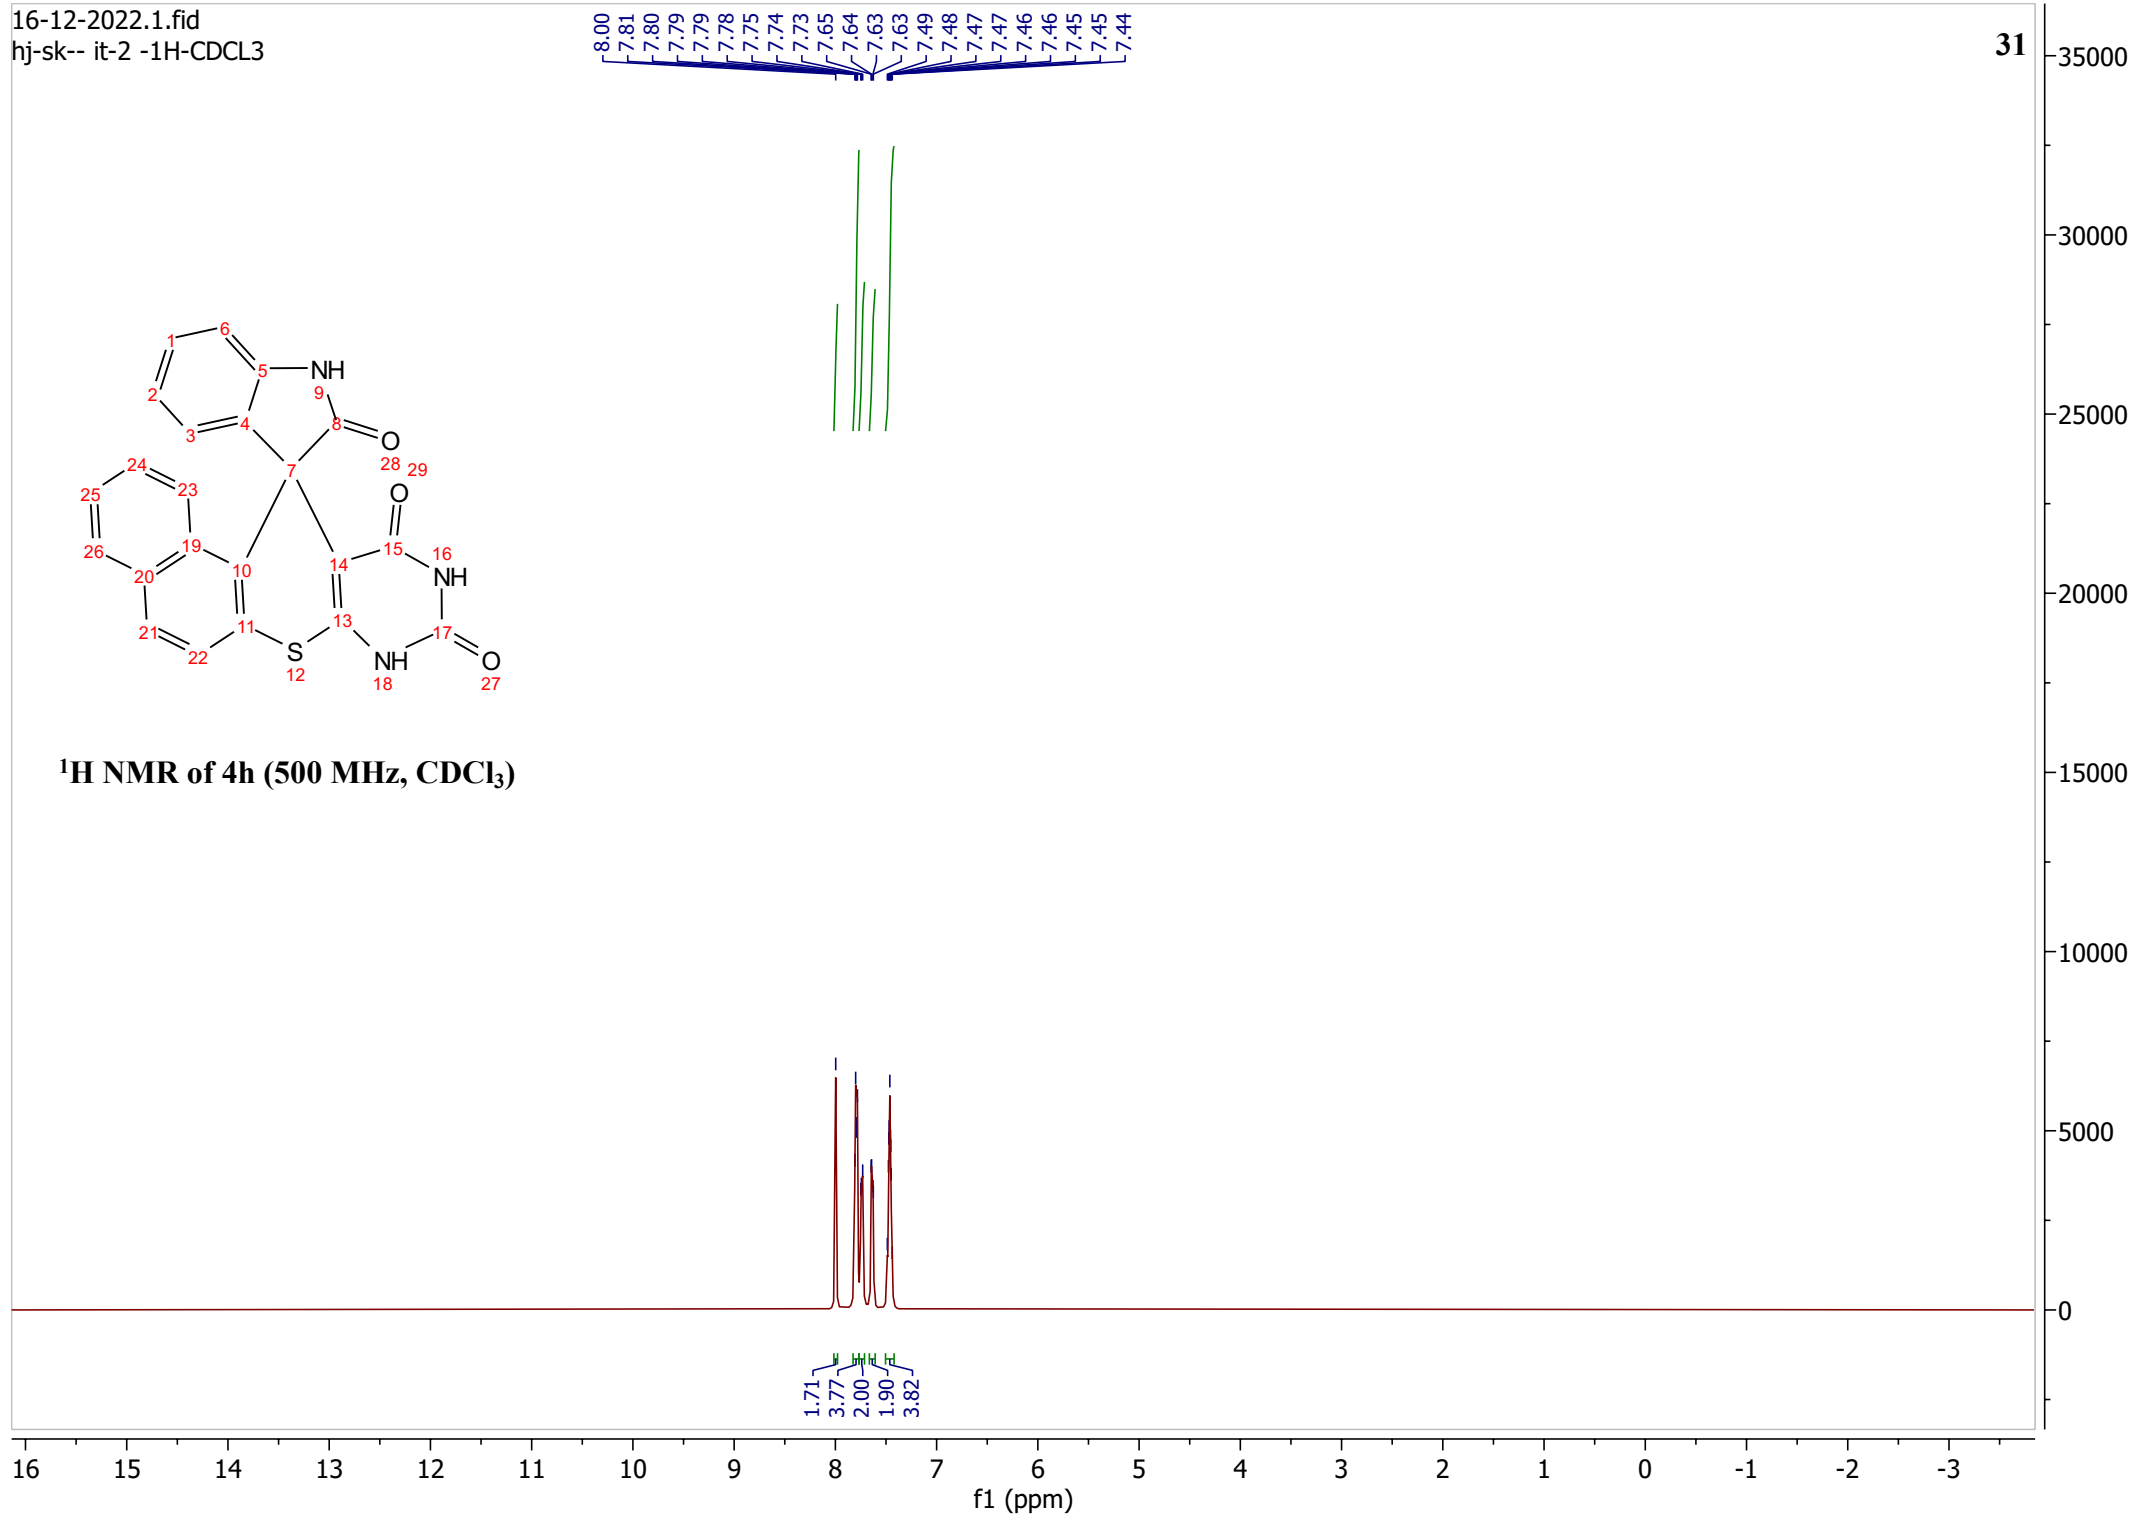

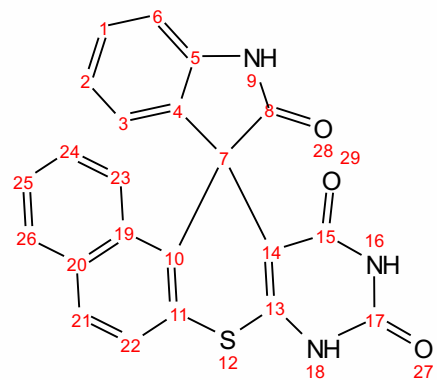

<sup>13</sup>C {<sup>1</sup>H} NMR of 4h (500 MHz, CDCl<sub>3</sub>)

168.00  
159.12  
142.97  
138.64  
134.46  
133.64  
129.10  
128.57  
127.61  
127.31  
126.49  
126.41  
126.12  
125.89

77.41 (CDCl<sub>3</sub>)  
77.16 (CDCl<sub>3</sub>)  
76.91 (CDCl<sub>3</sub>)

60.34

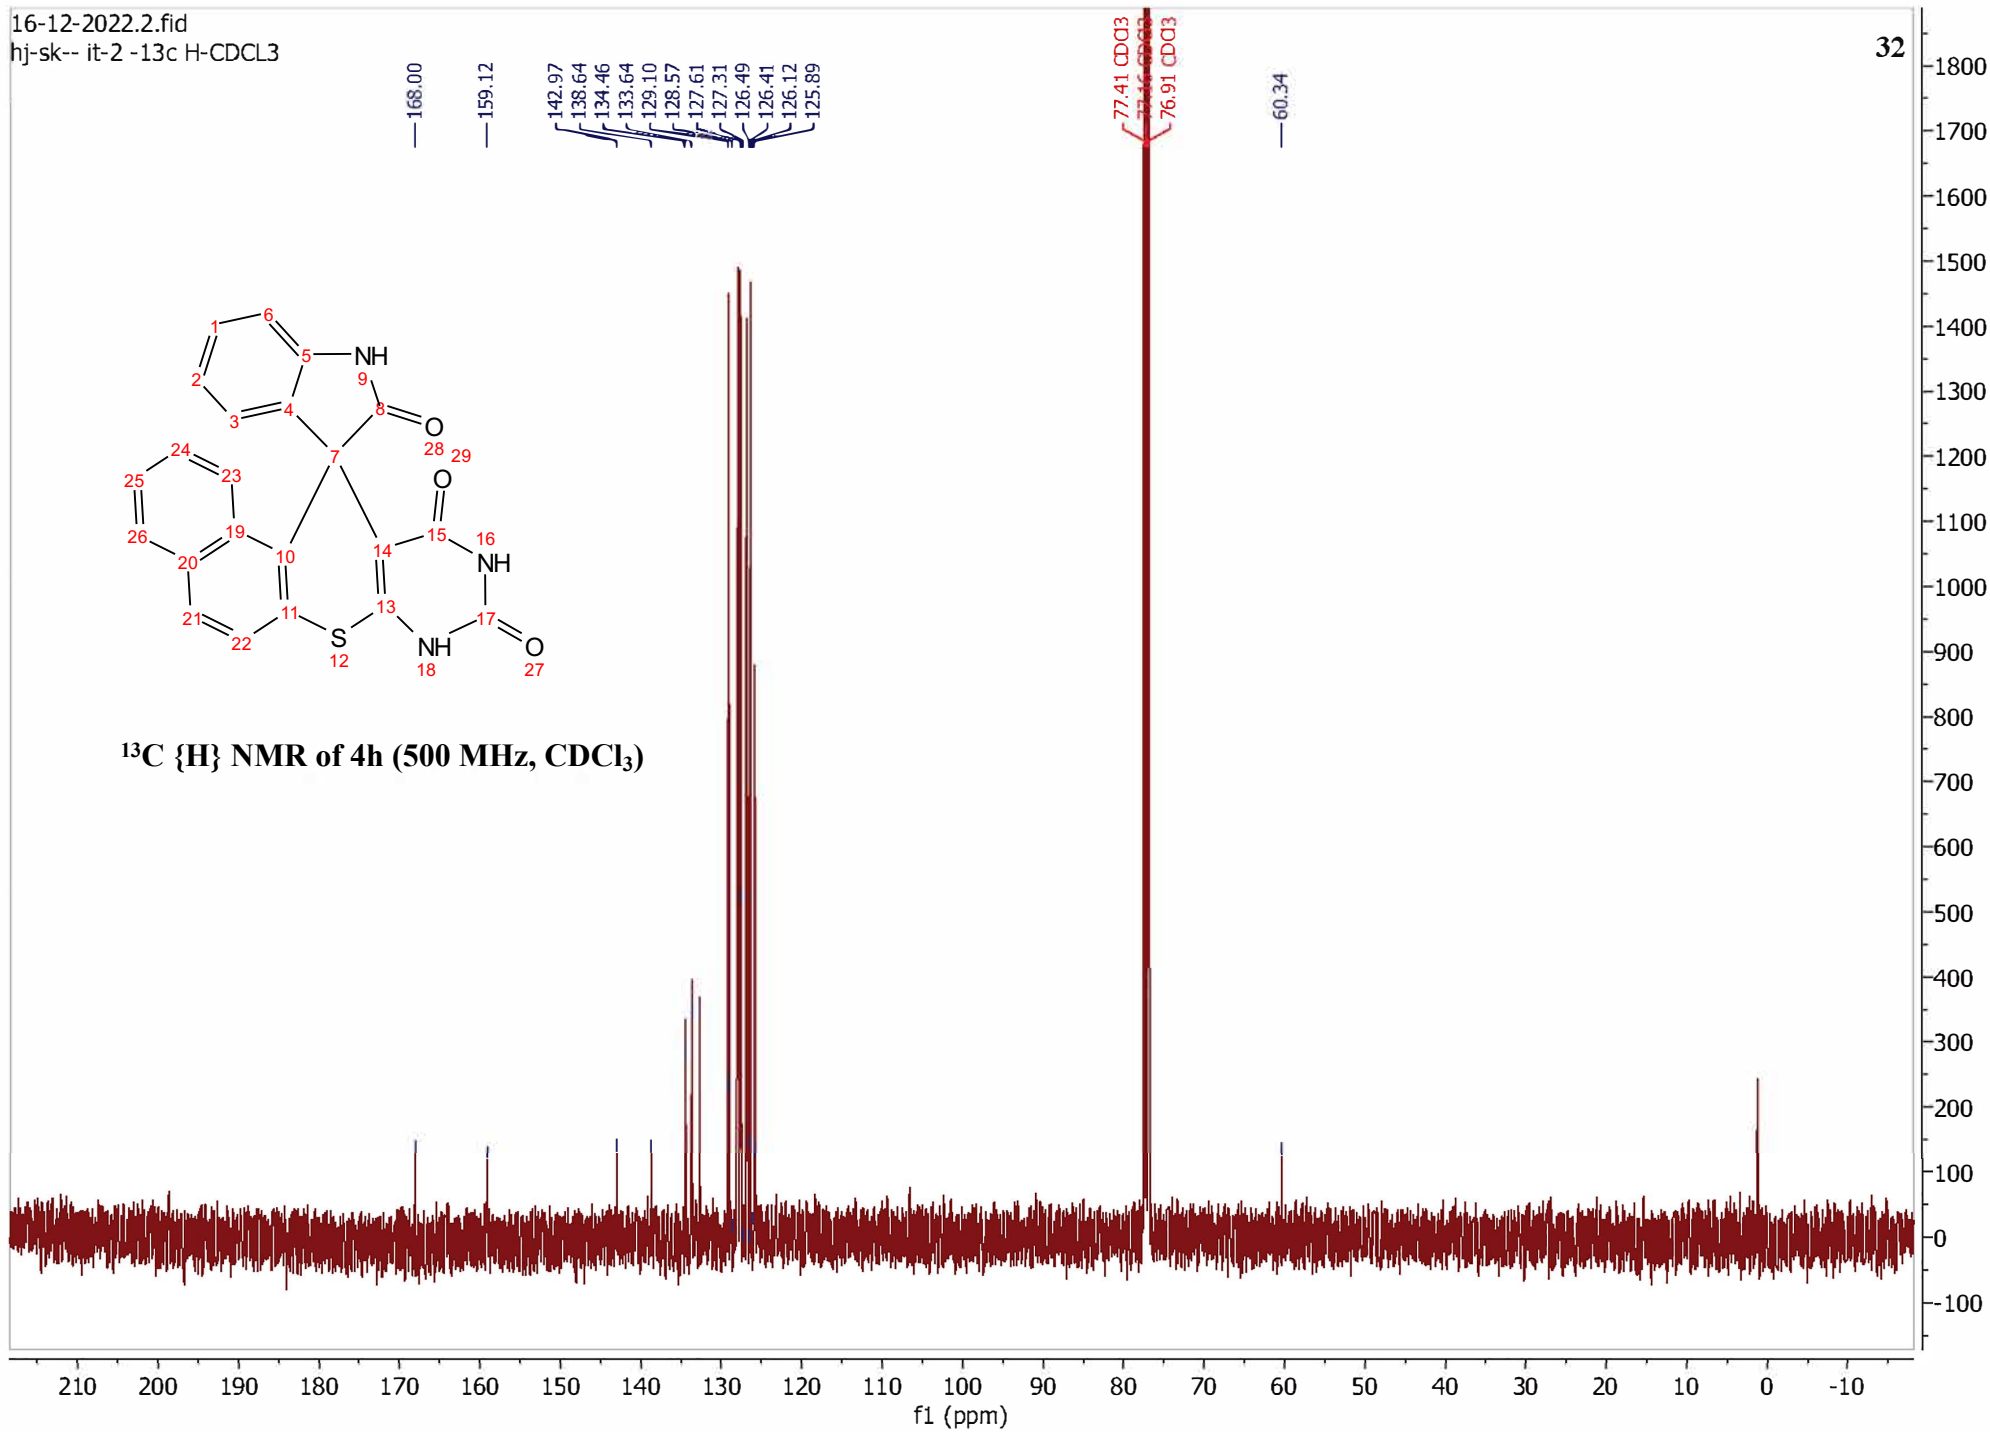

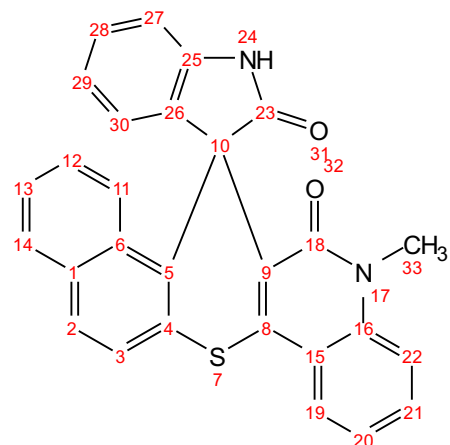

<sup>1</sup>H NMR of 4i (500 MHz, CDCl<sub>3</sub>)

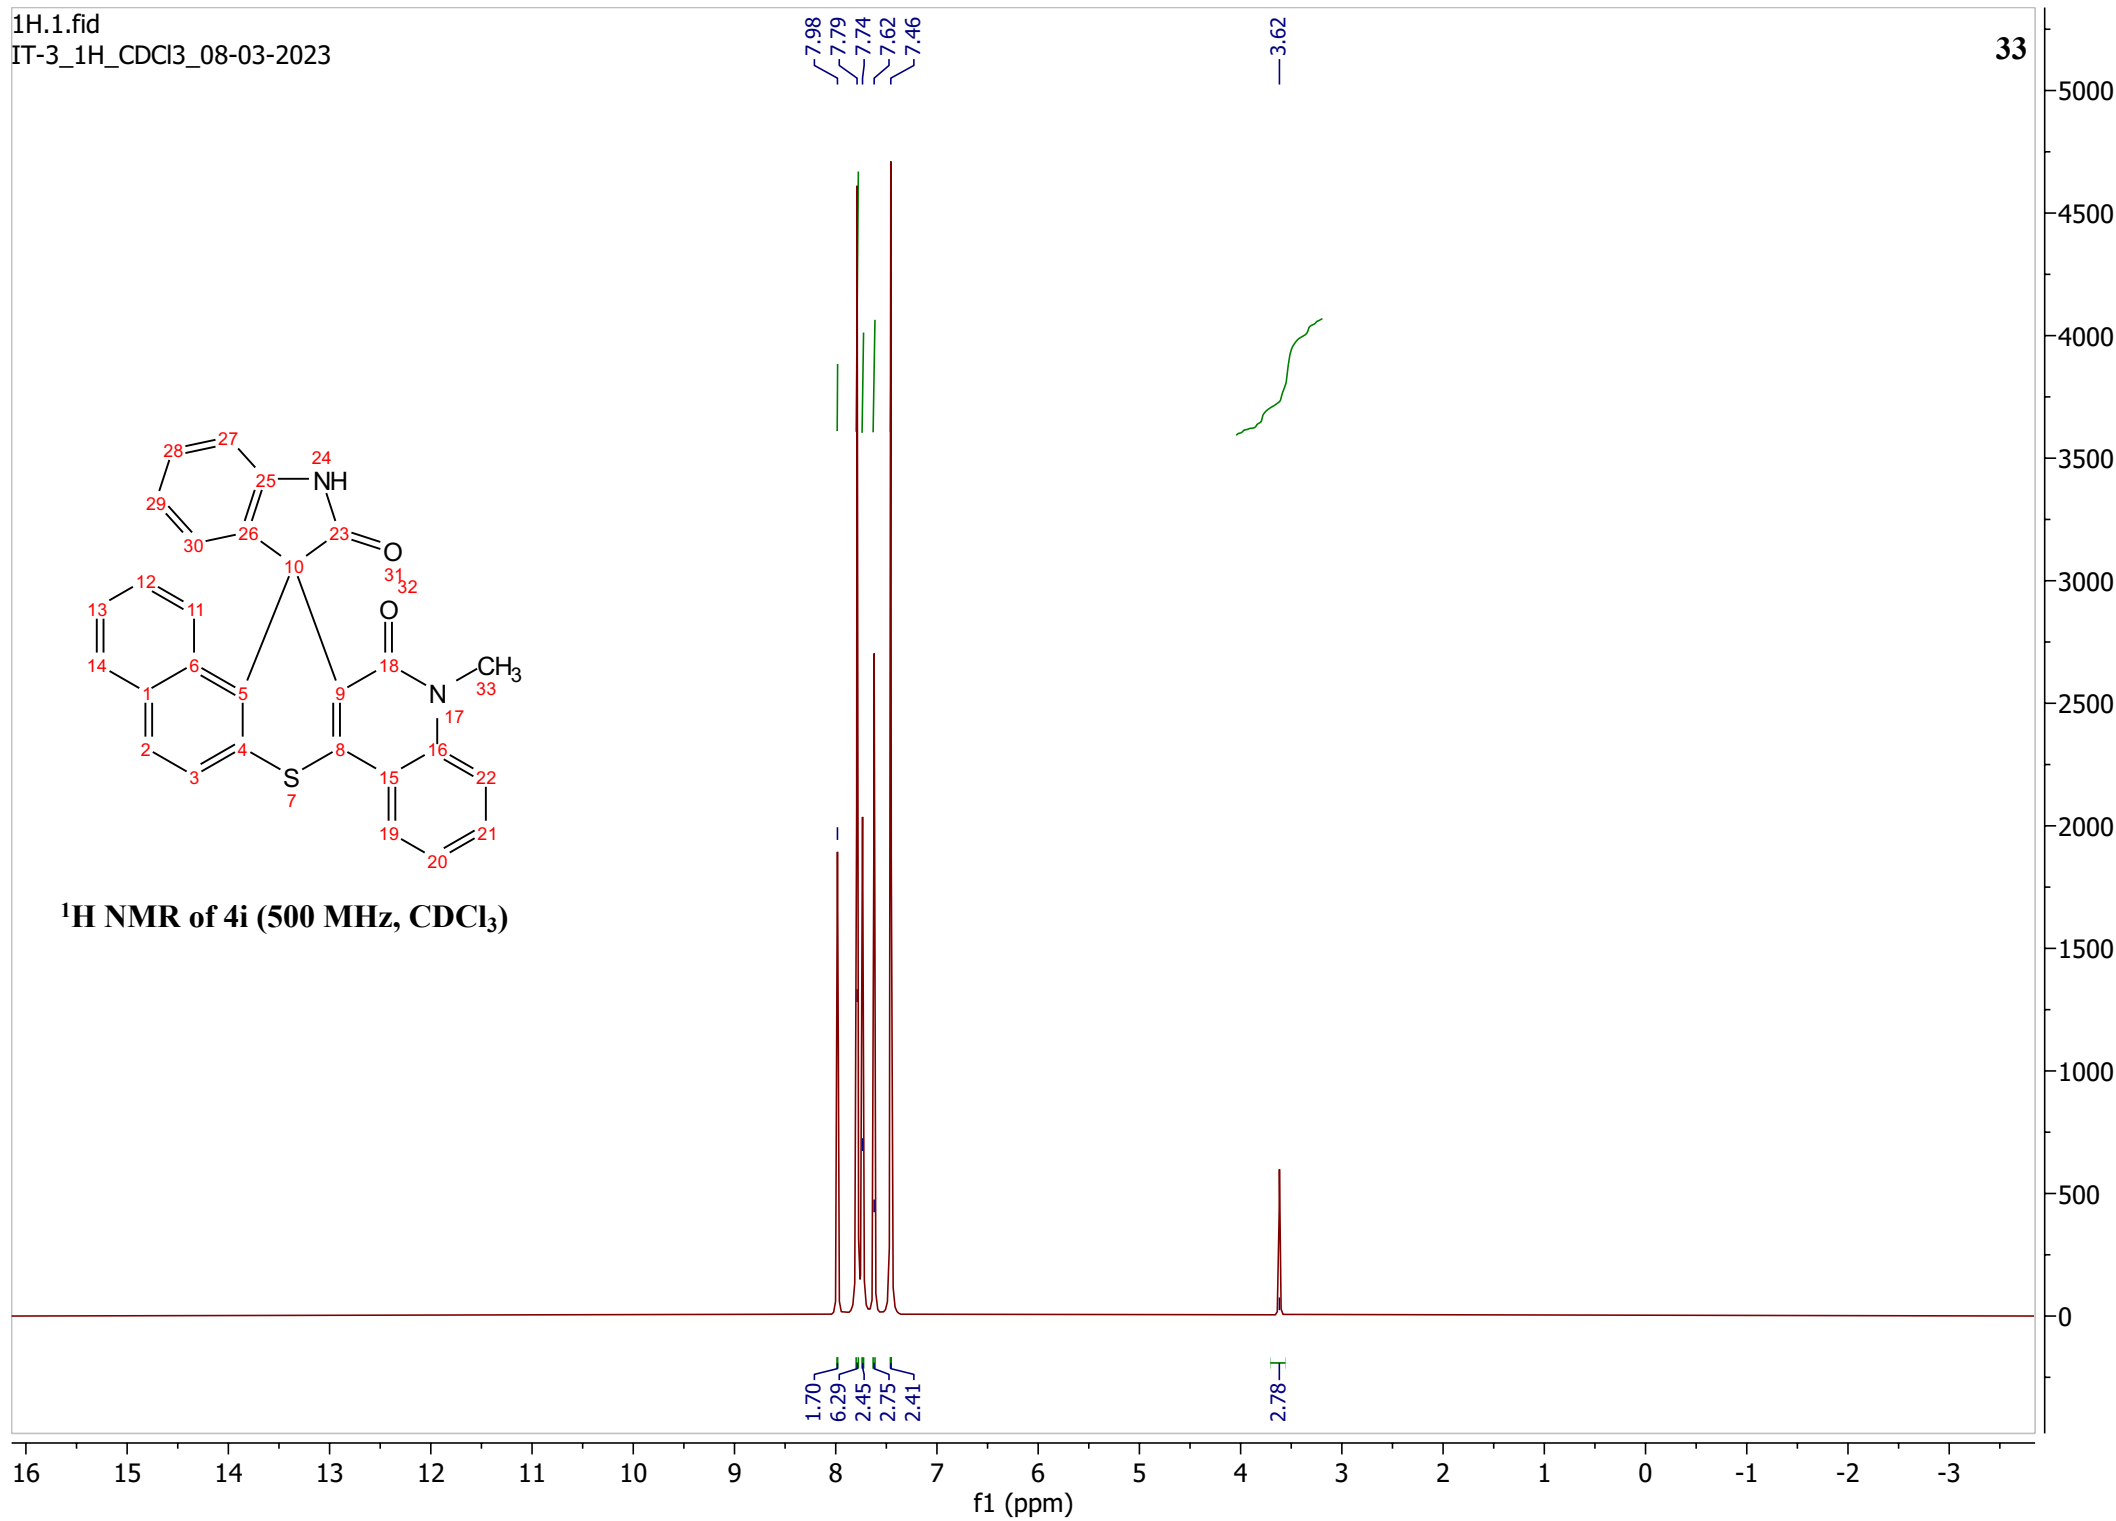

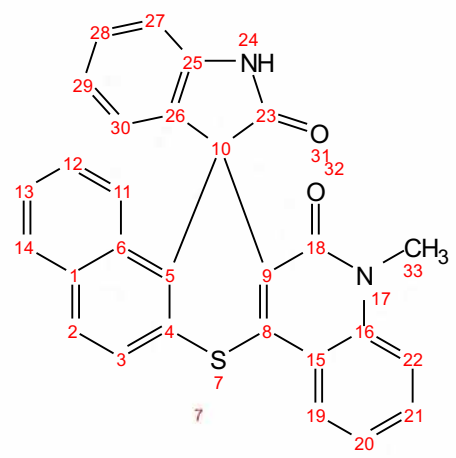

<sup>13</sup>C {H} NMR of 4i (500 MHz, CDCl<sub>3</sub>)

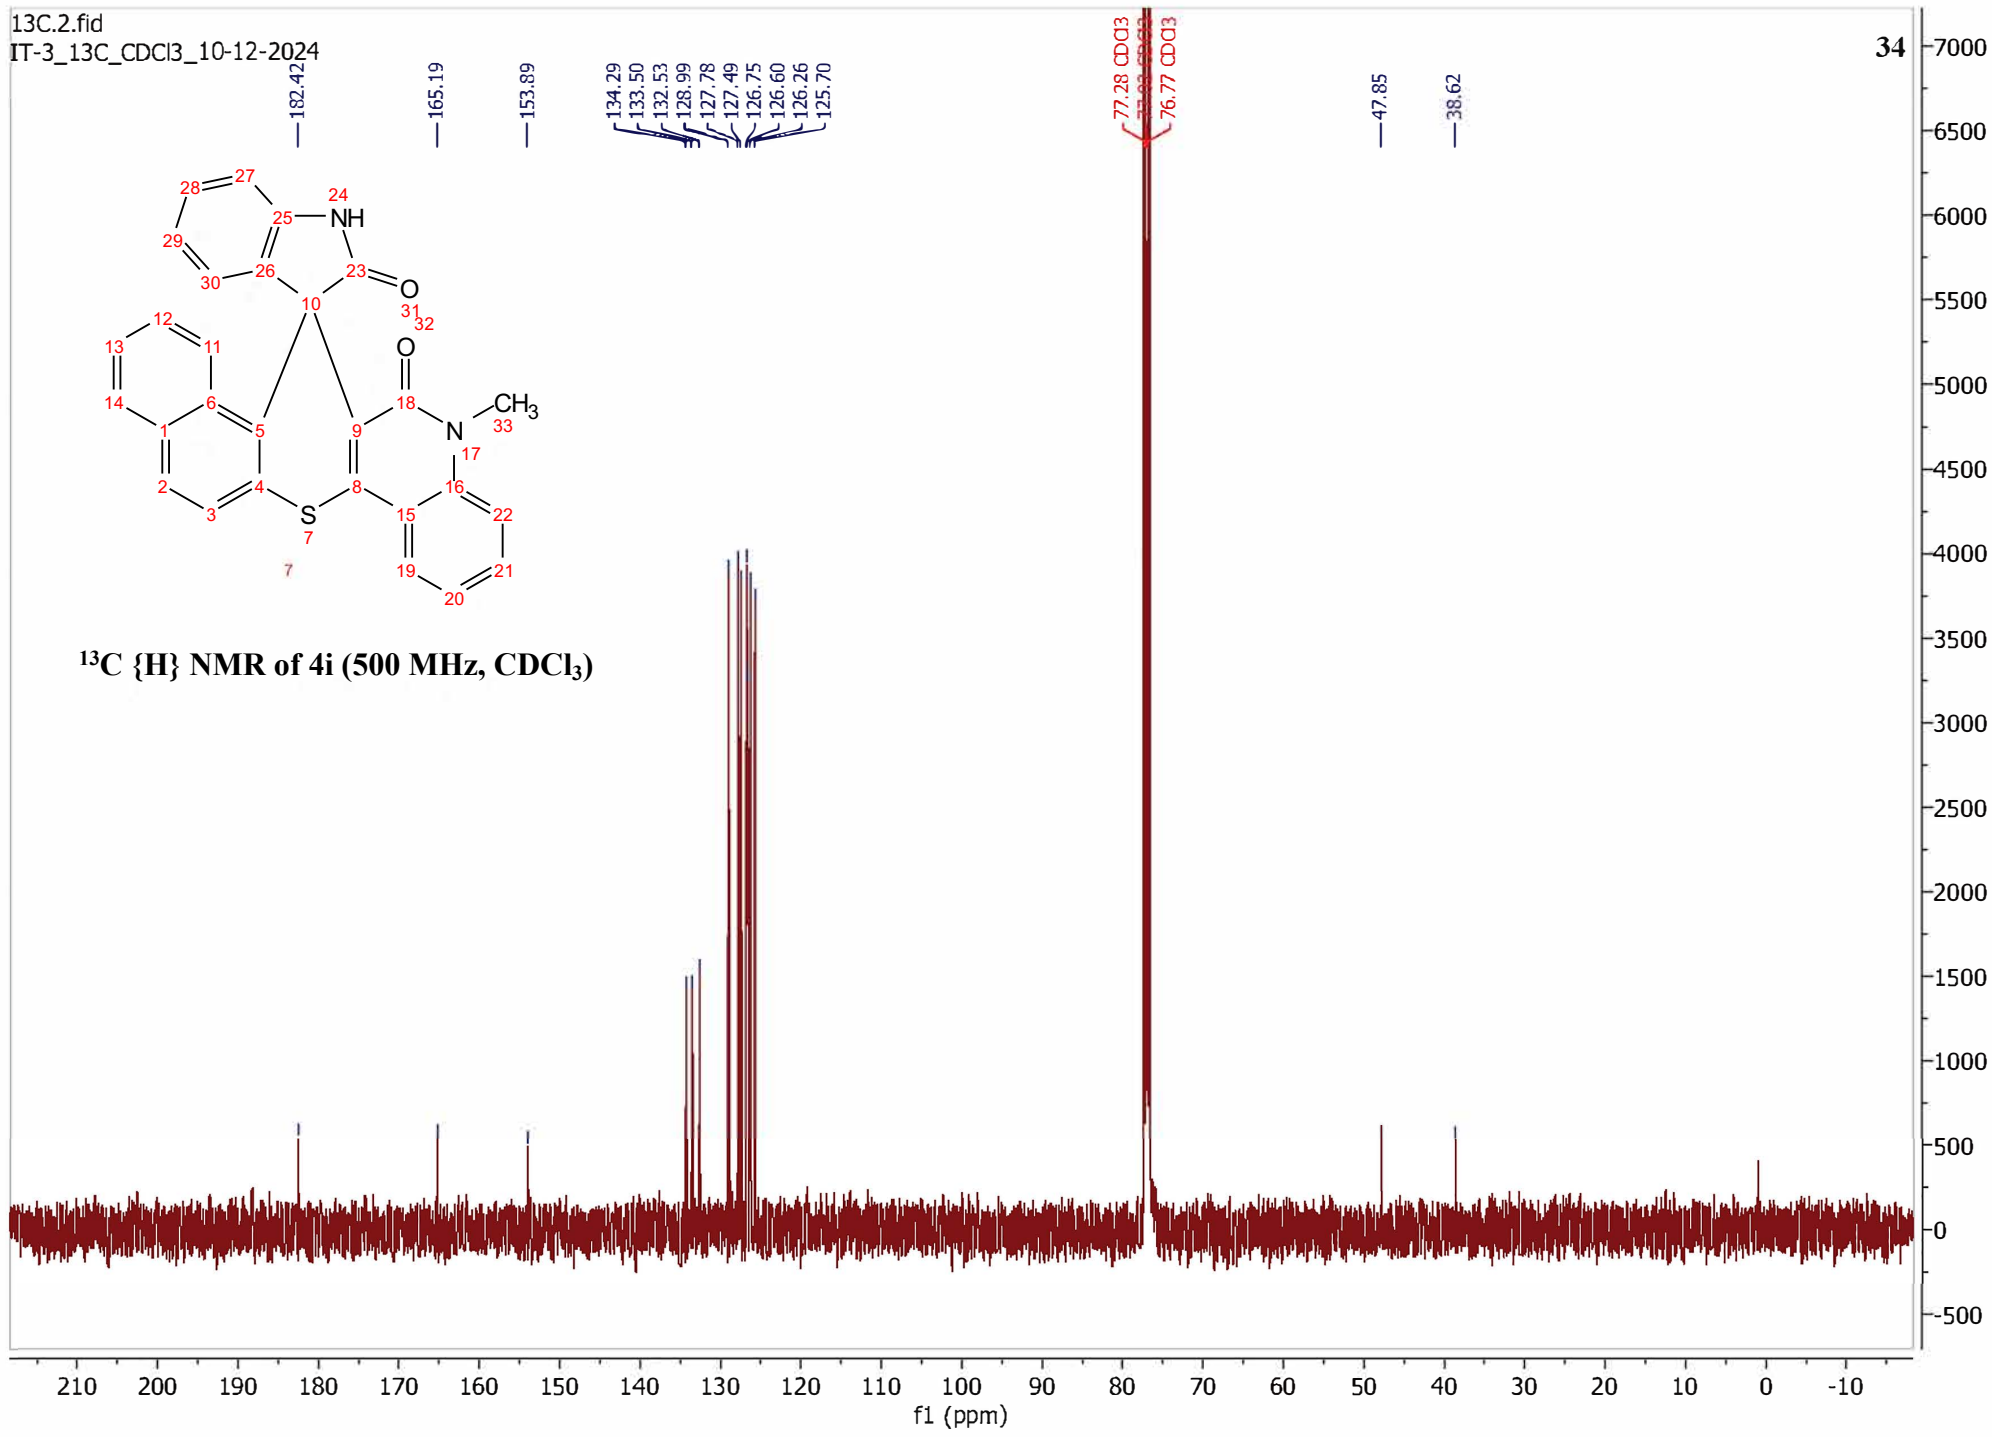

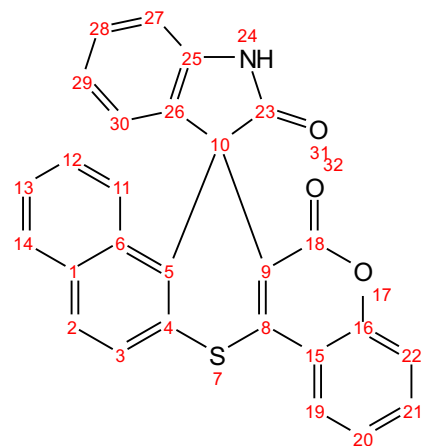

<sup>1</sup>H NMR of 4j (500 MHz, CDCl<sub>3</sub>)

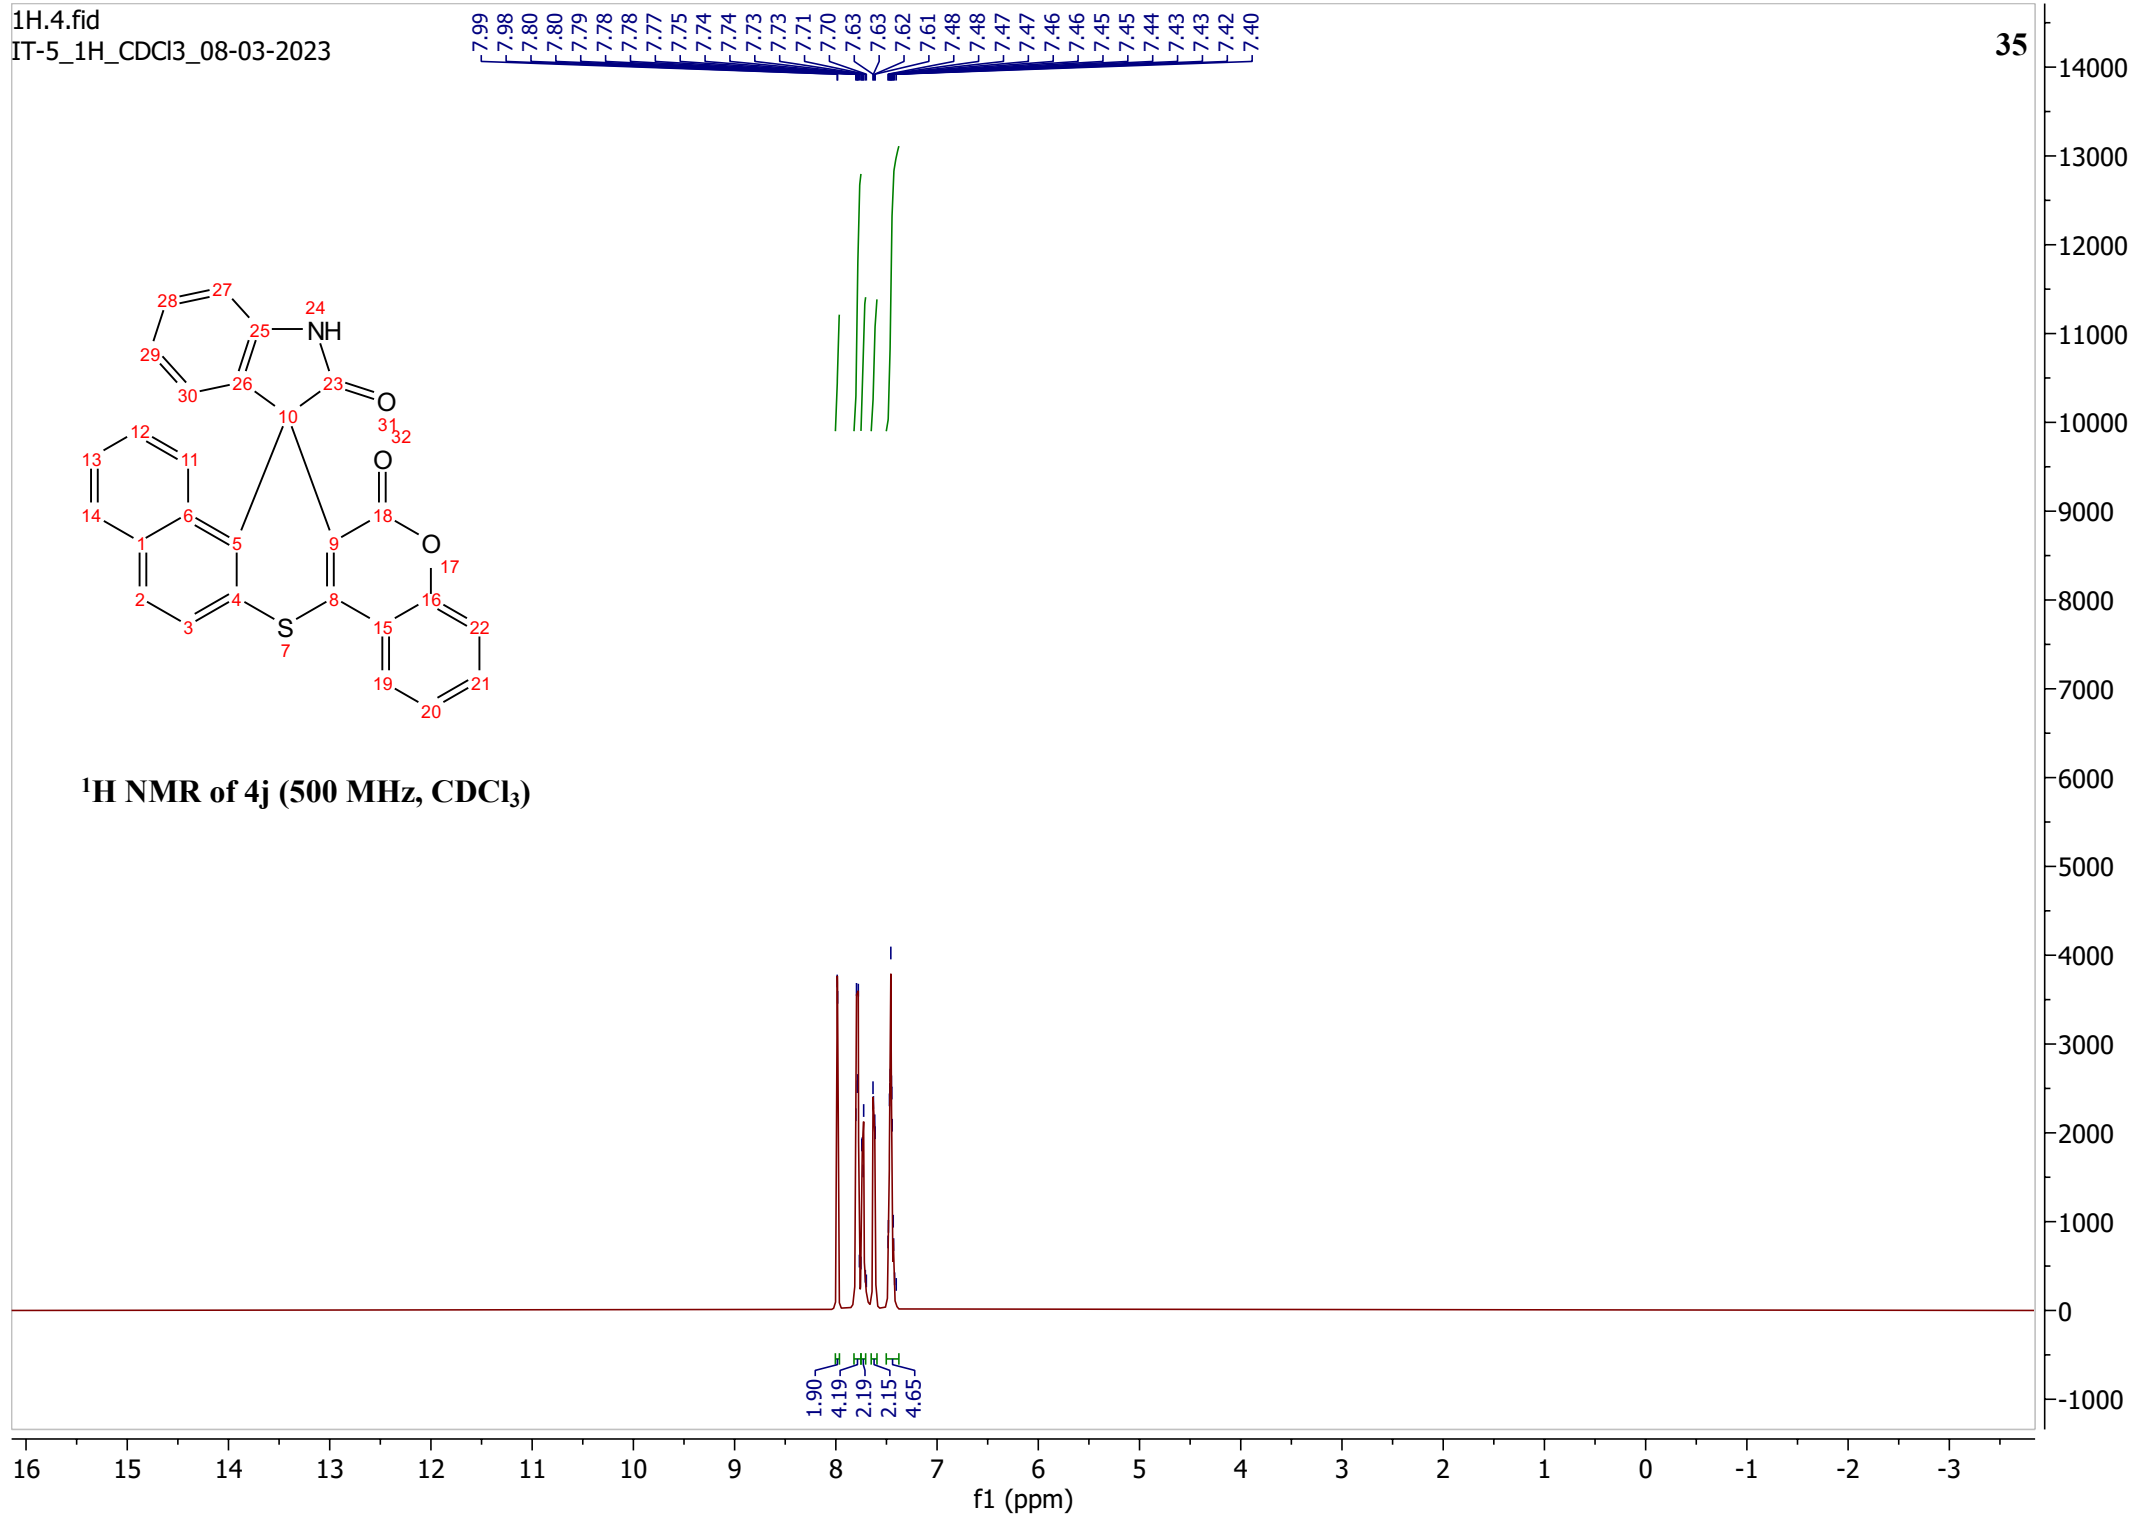

13C.3.fid  
IT-5\_13C\_CDCl3\_10-12-2024

36

173.09  
169.67

140.98  
138.33  
138.16  
134.42  
133.63  
132.66  
129.12  
127.92  
127.62  
126.88  
126.73  
126.39  
125.83  
113.18

77.41 CDCl3  
77.00 CDCl3  
76.91 CDCl3

51.11

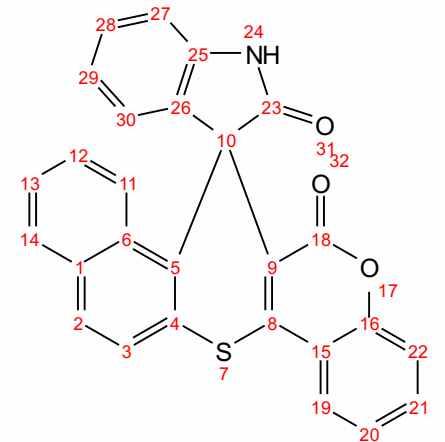

<sup>13</sup>C {H} NMR of 4j (500 MHz, CDCl<sub>3</sub>)

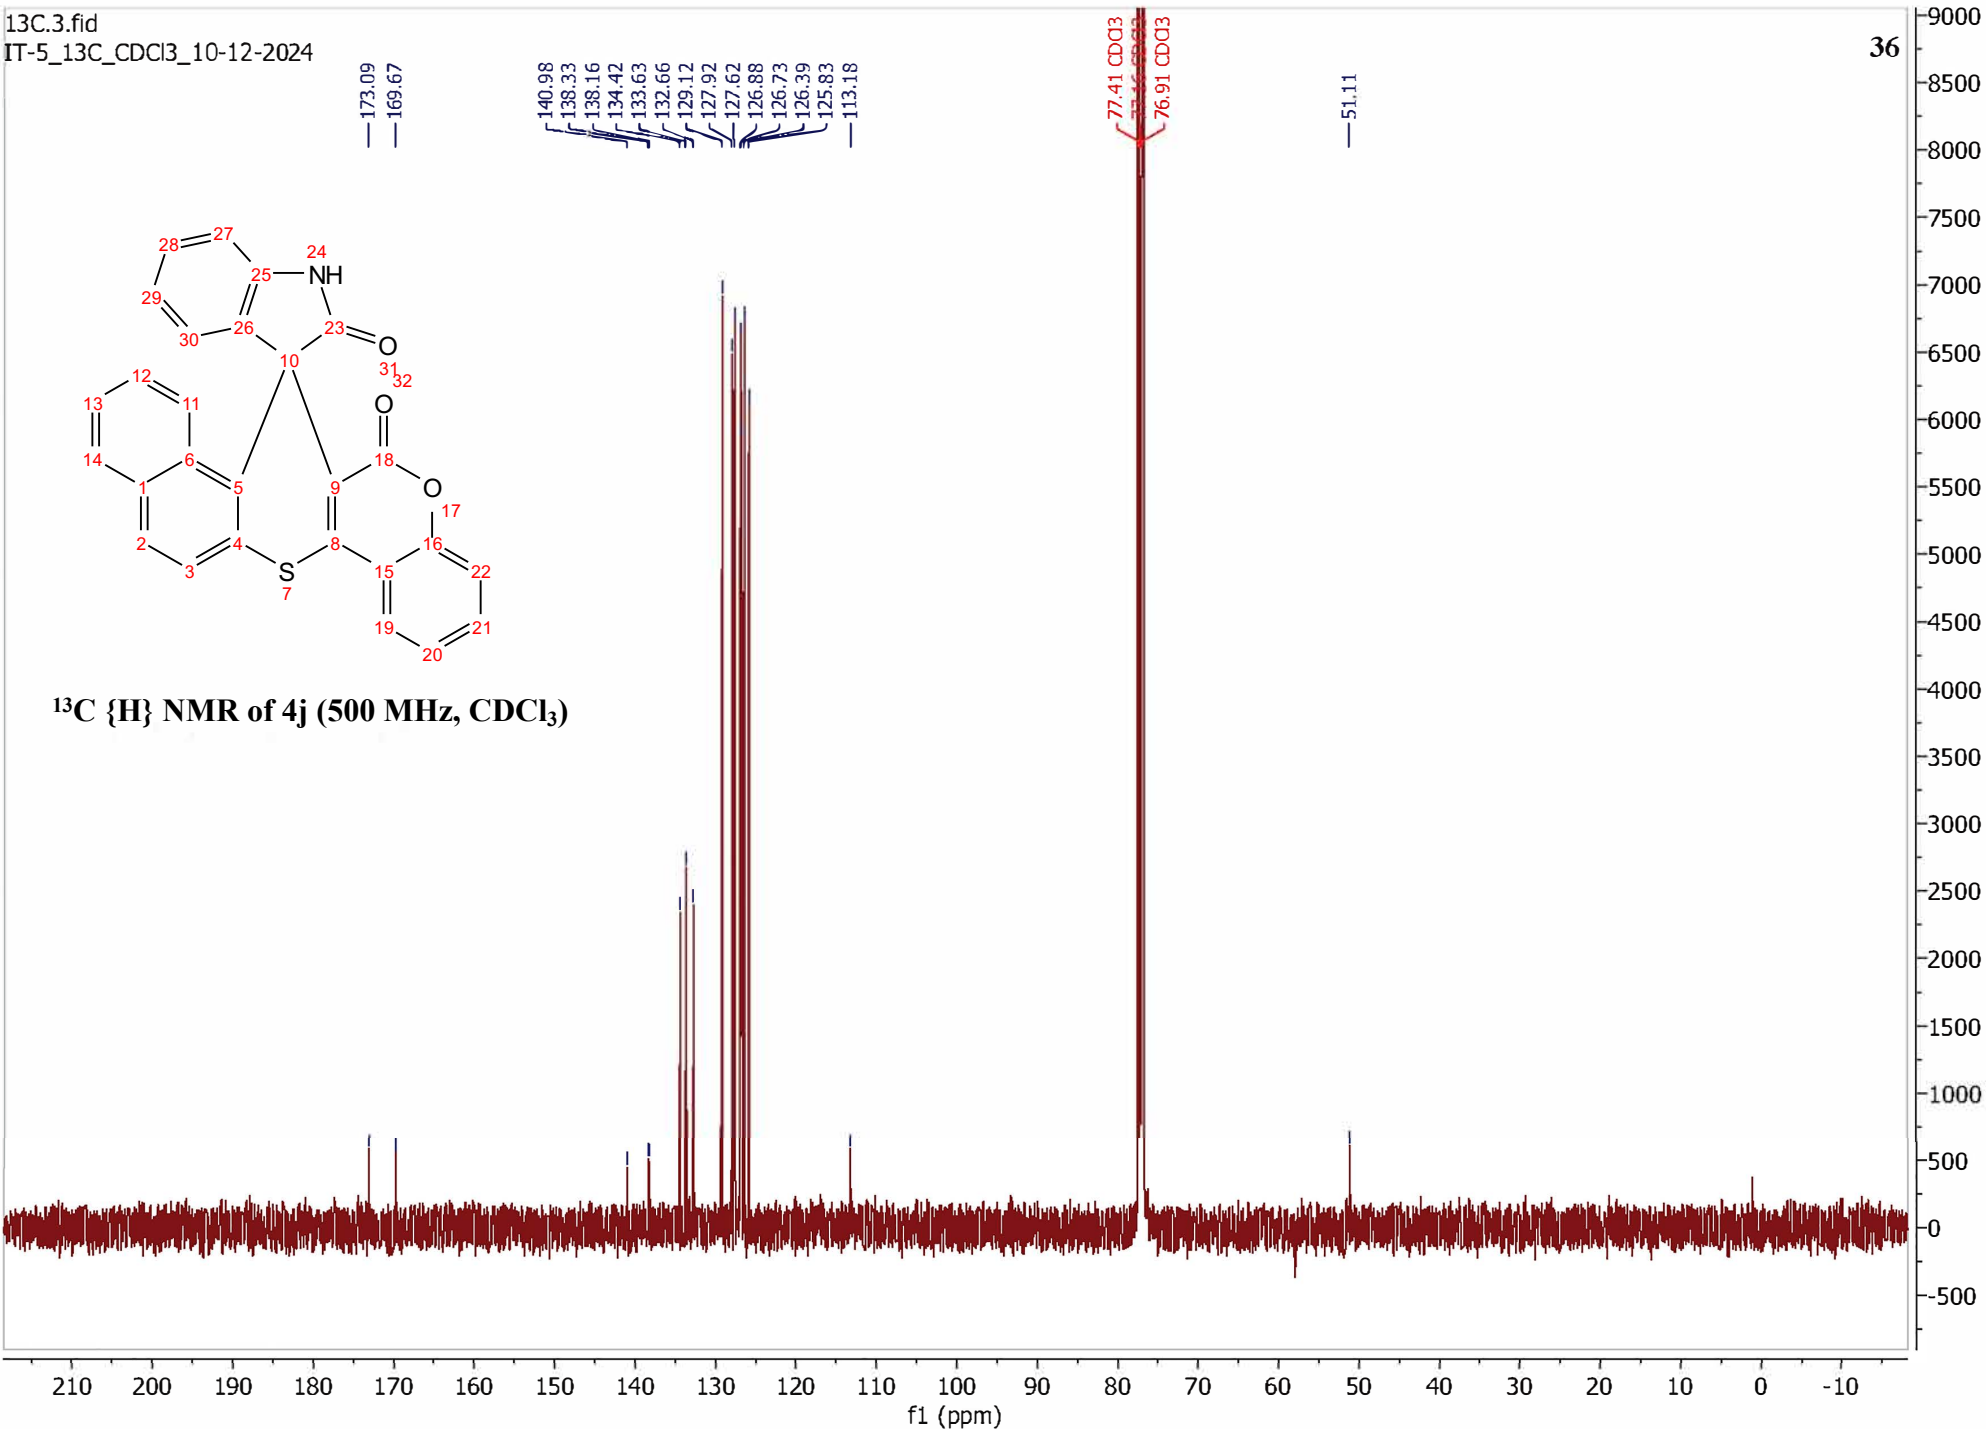



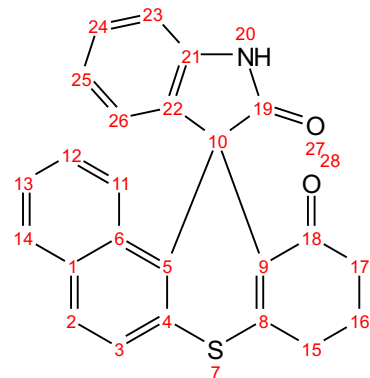

<sup>1</sup>H NMR of 4k (500 MHz, CDCl<sub>3</sub>)

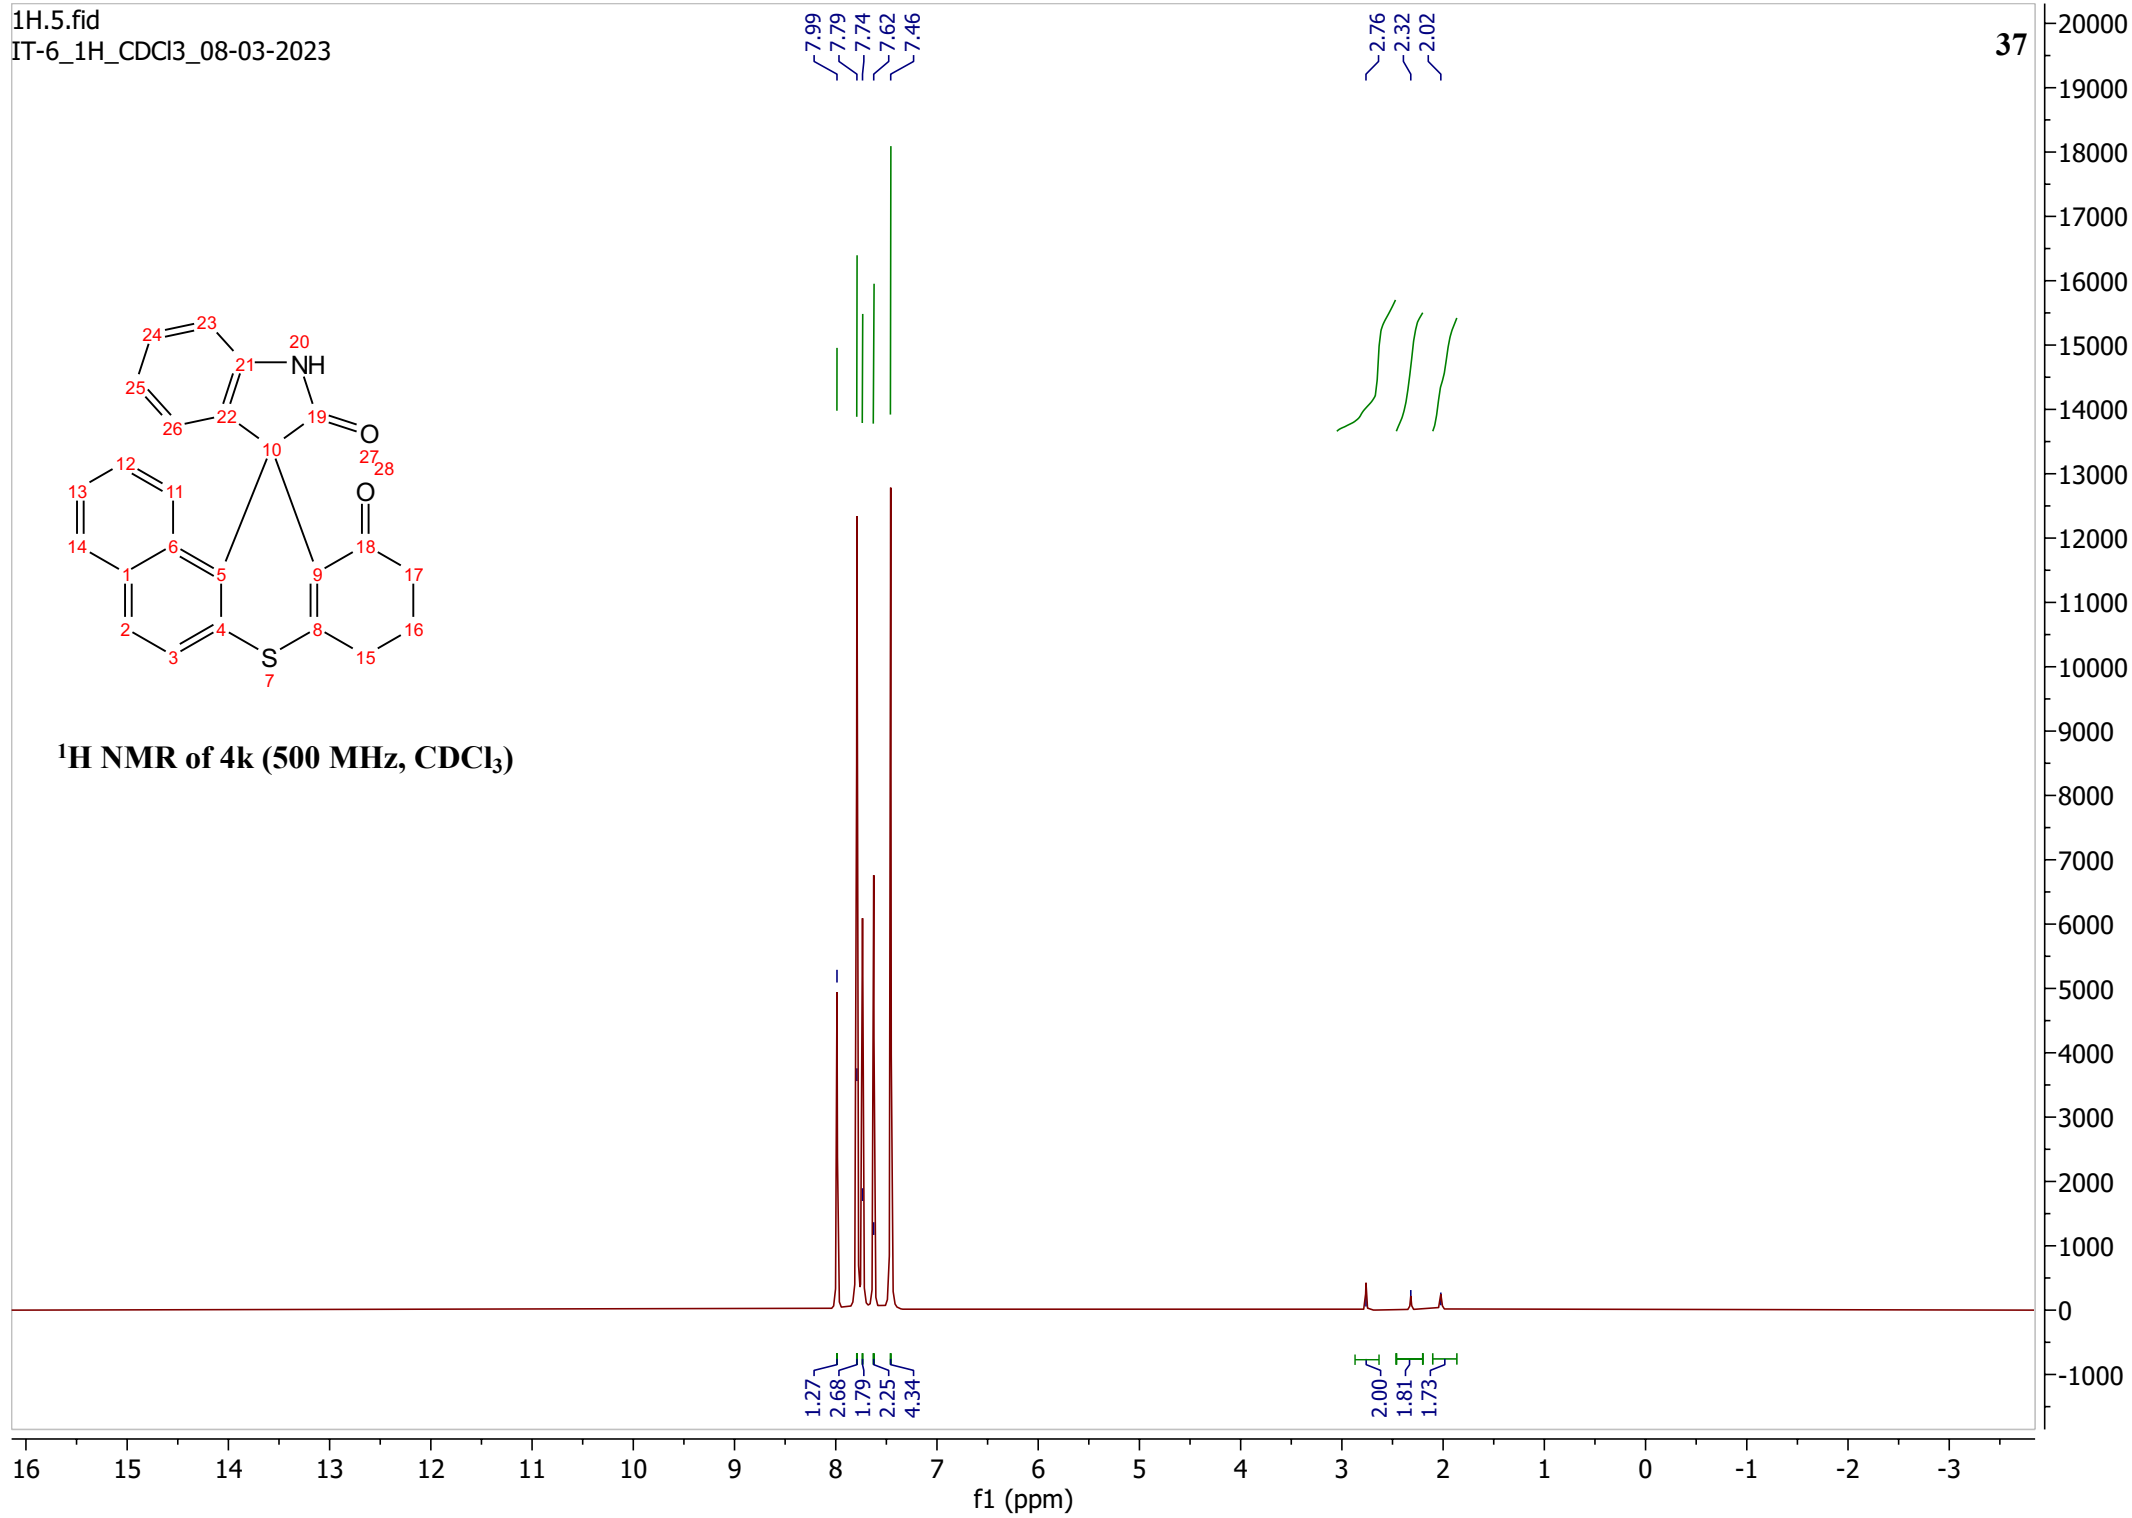

198.95  
166.90  
154.27  
147.55  
134.42  
133.63  
132.66  
129.12  
127.91  
127.61  
126.88  
126.72  
126.39  
125.82

77.41 CDCl3  
77.00 CDCl3  
76.60 CDCl3  
76.19 CDCl3

52.40  
37.38  
27.72  
20.14

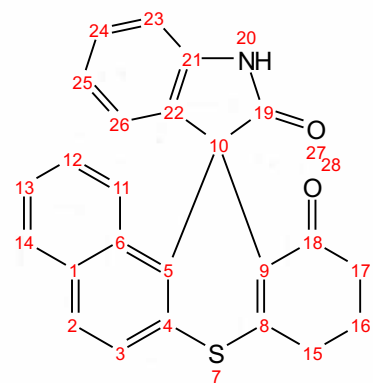

<sup>13</sup>C {H} NMR of 4k (500 MHz, CDCl<sub>3</sub>)

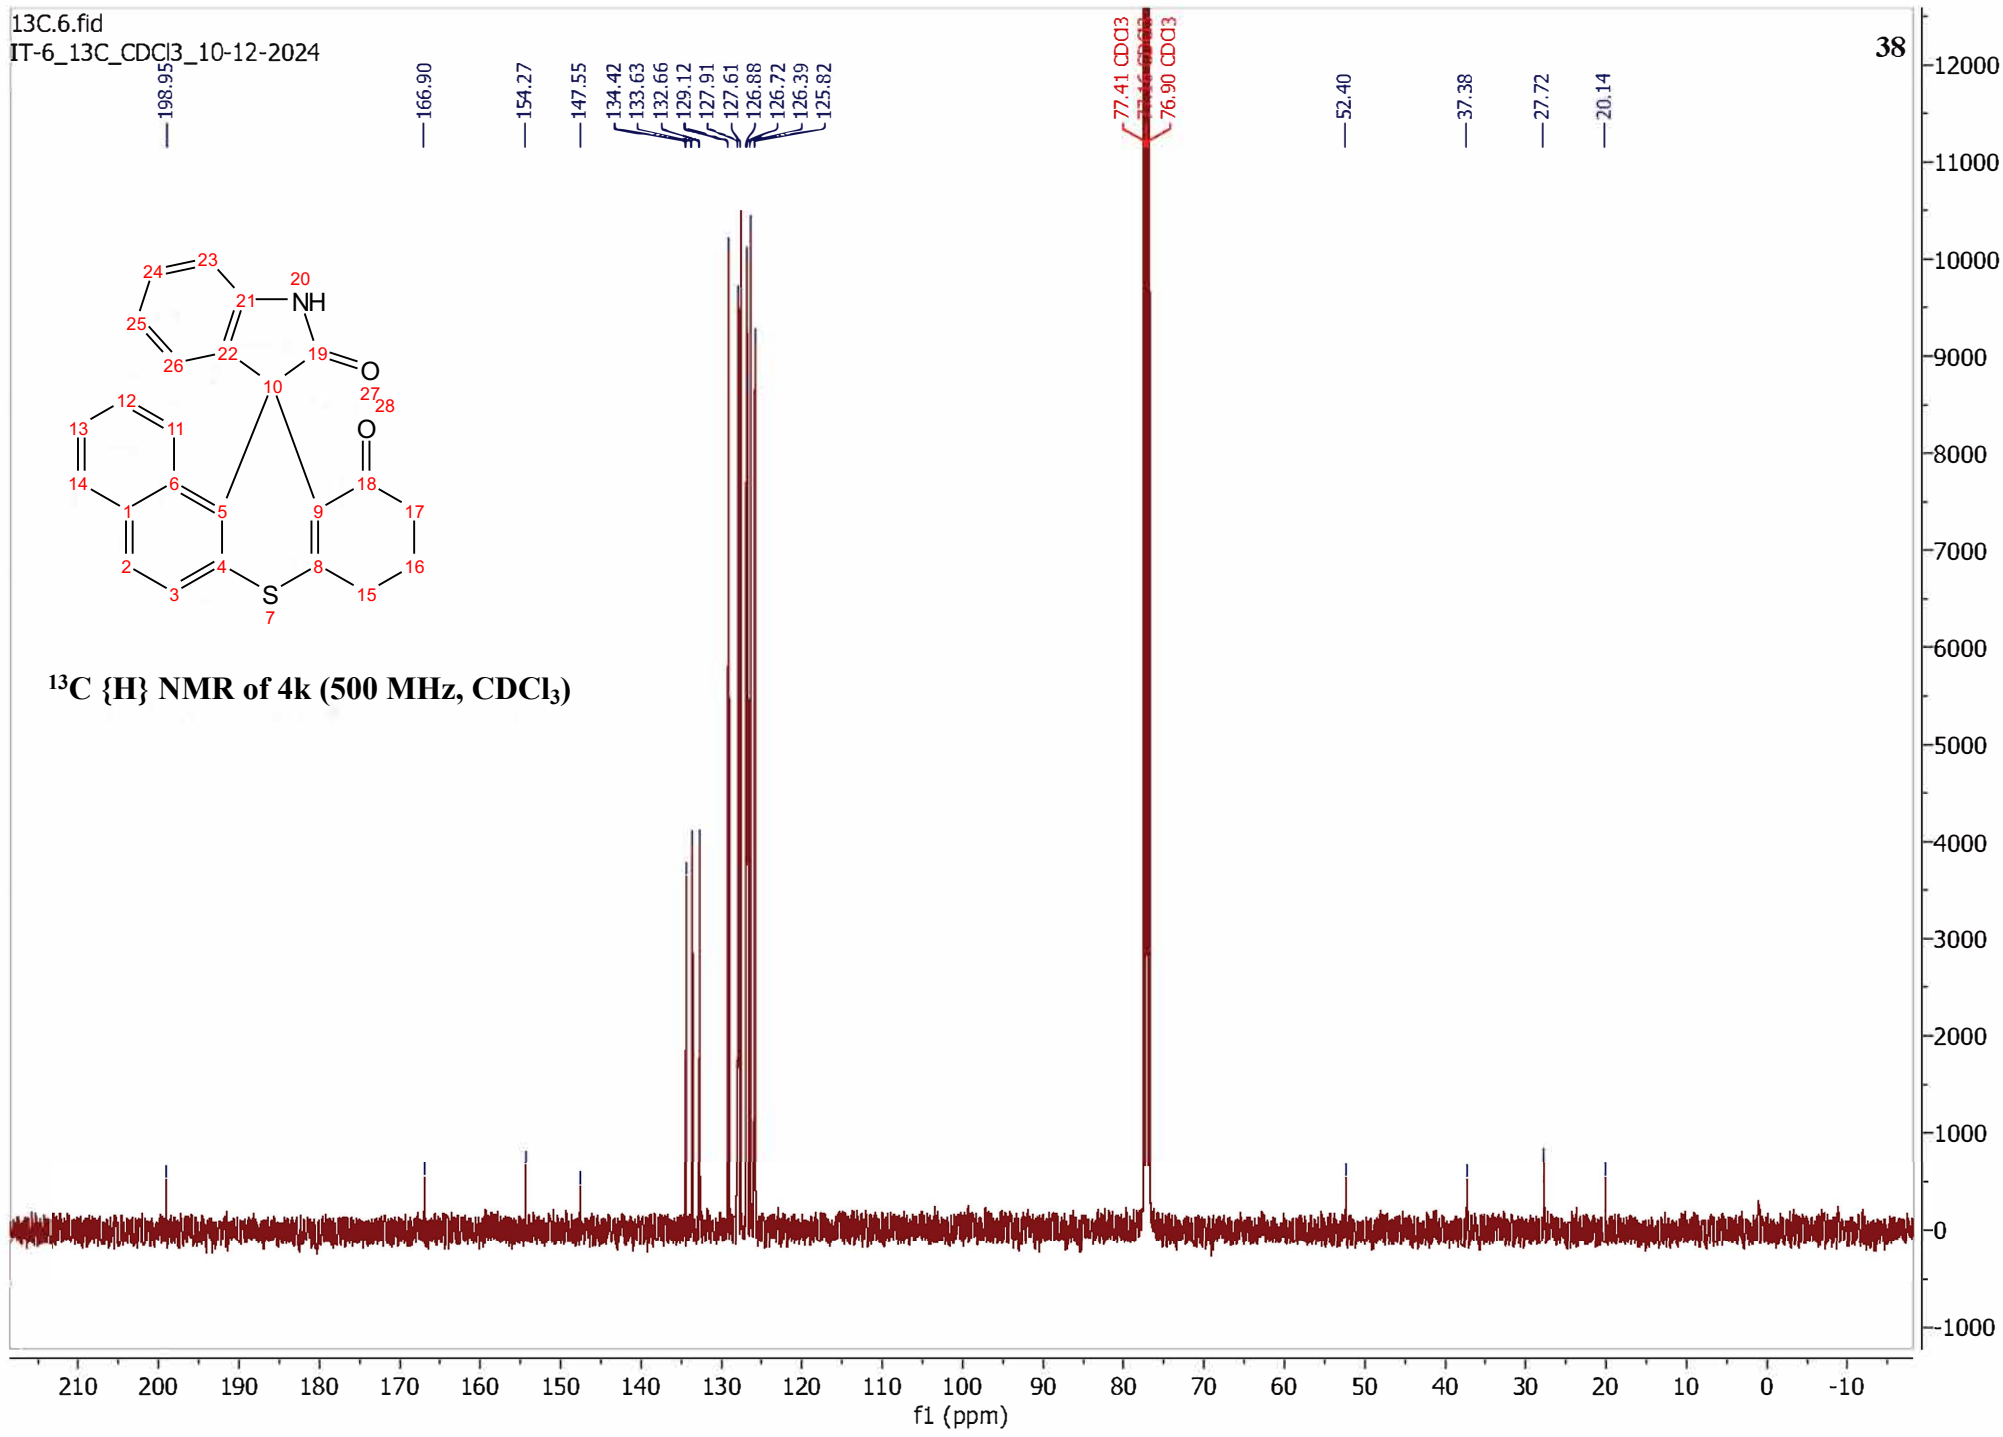

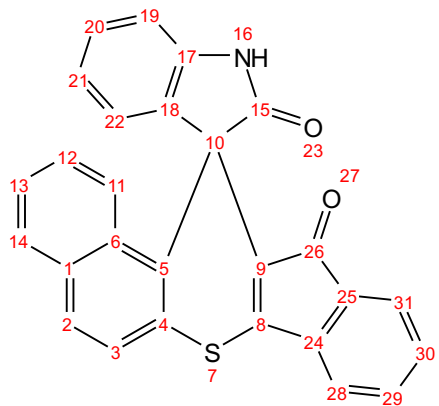

<sup>1</sup>H NMR of 4l (500 MHz, CDCl<sub>3</sub>)

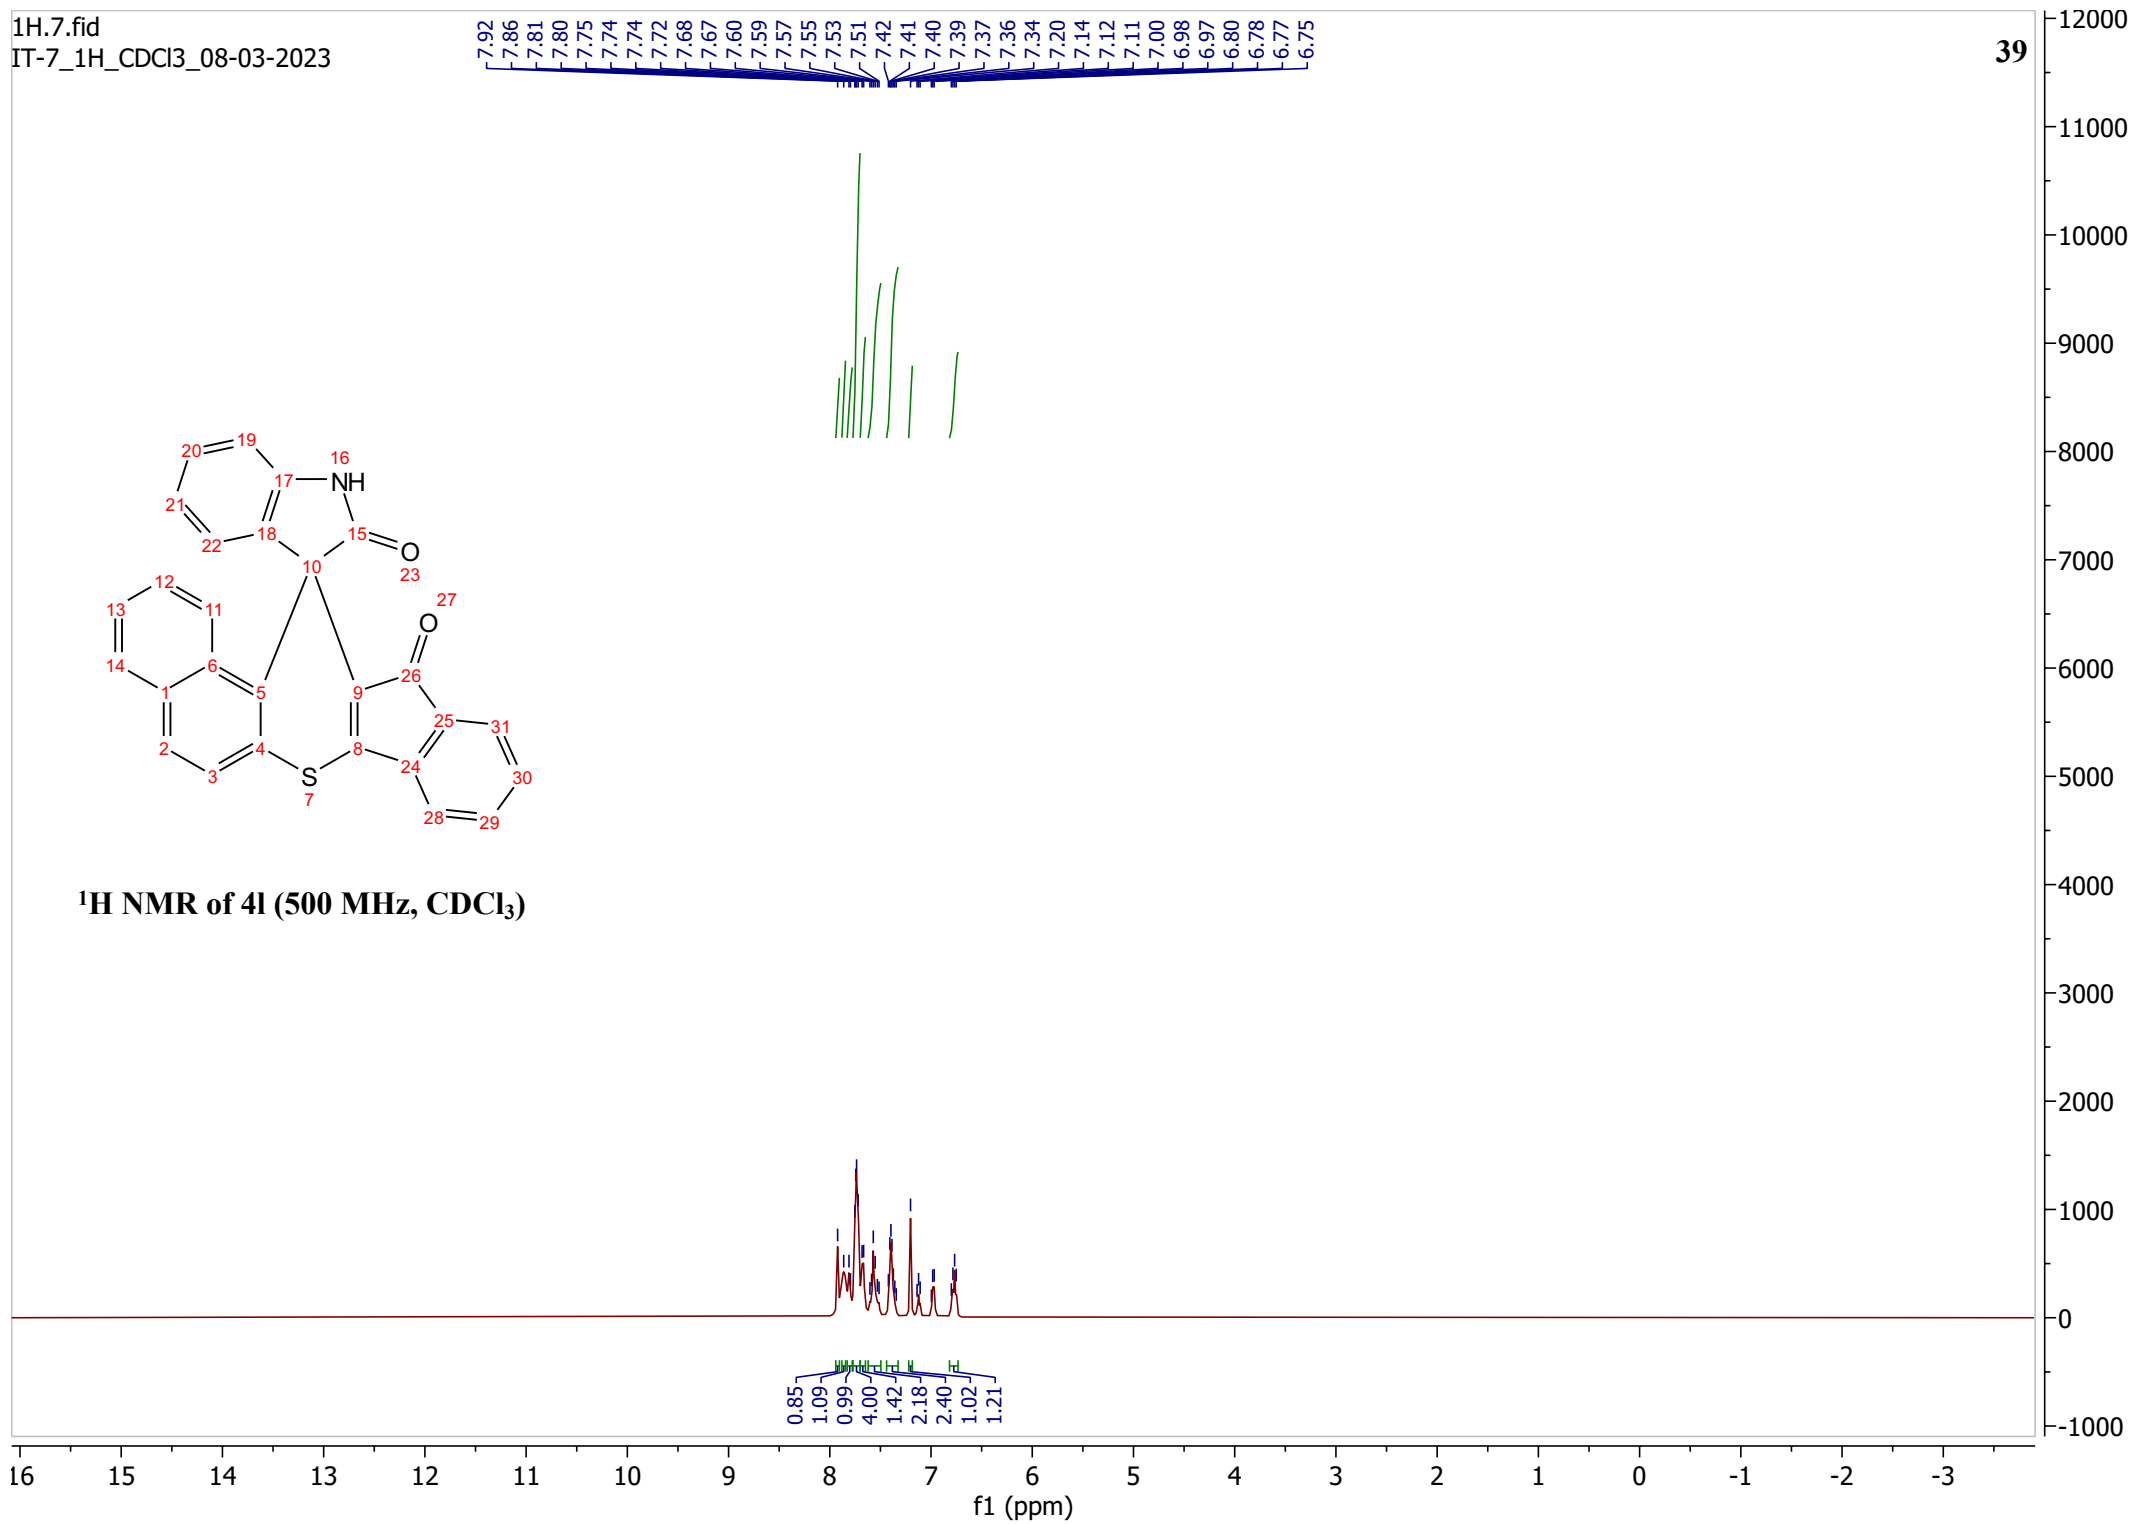

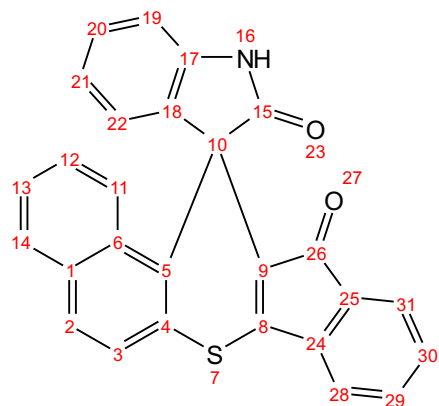

<sup>13</sup>C {H} NMR of 4l (500 MHz, CDCl<sub>3</sub>)

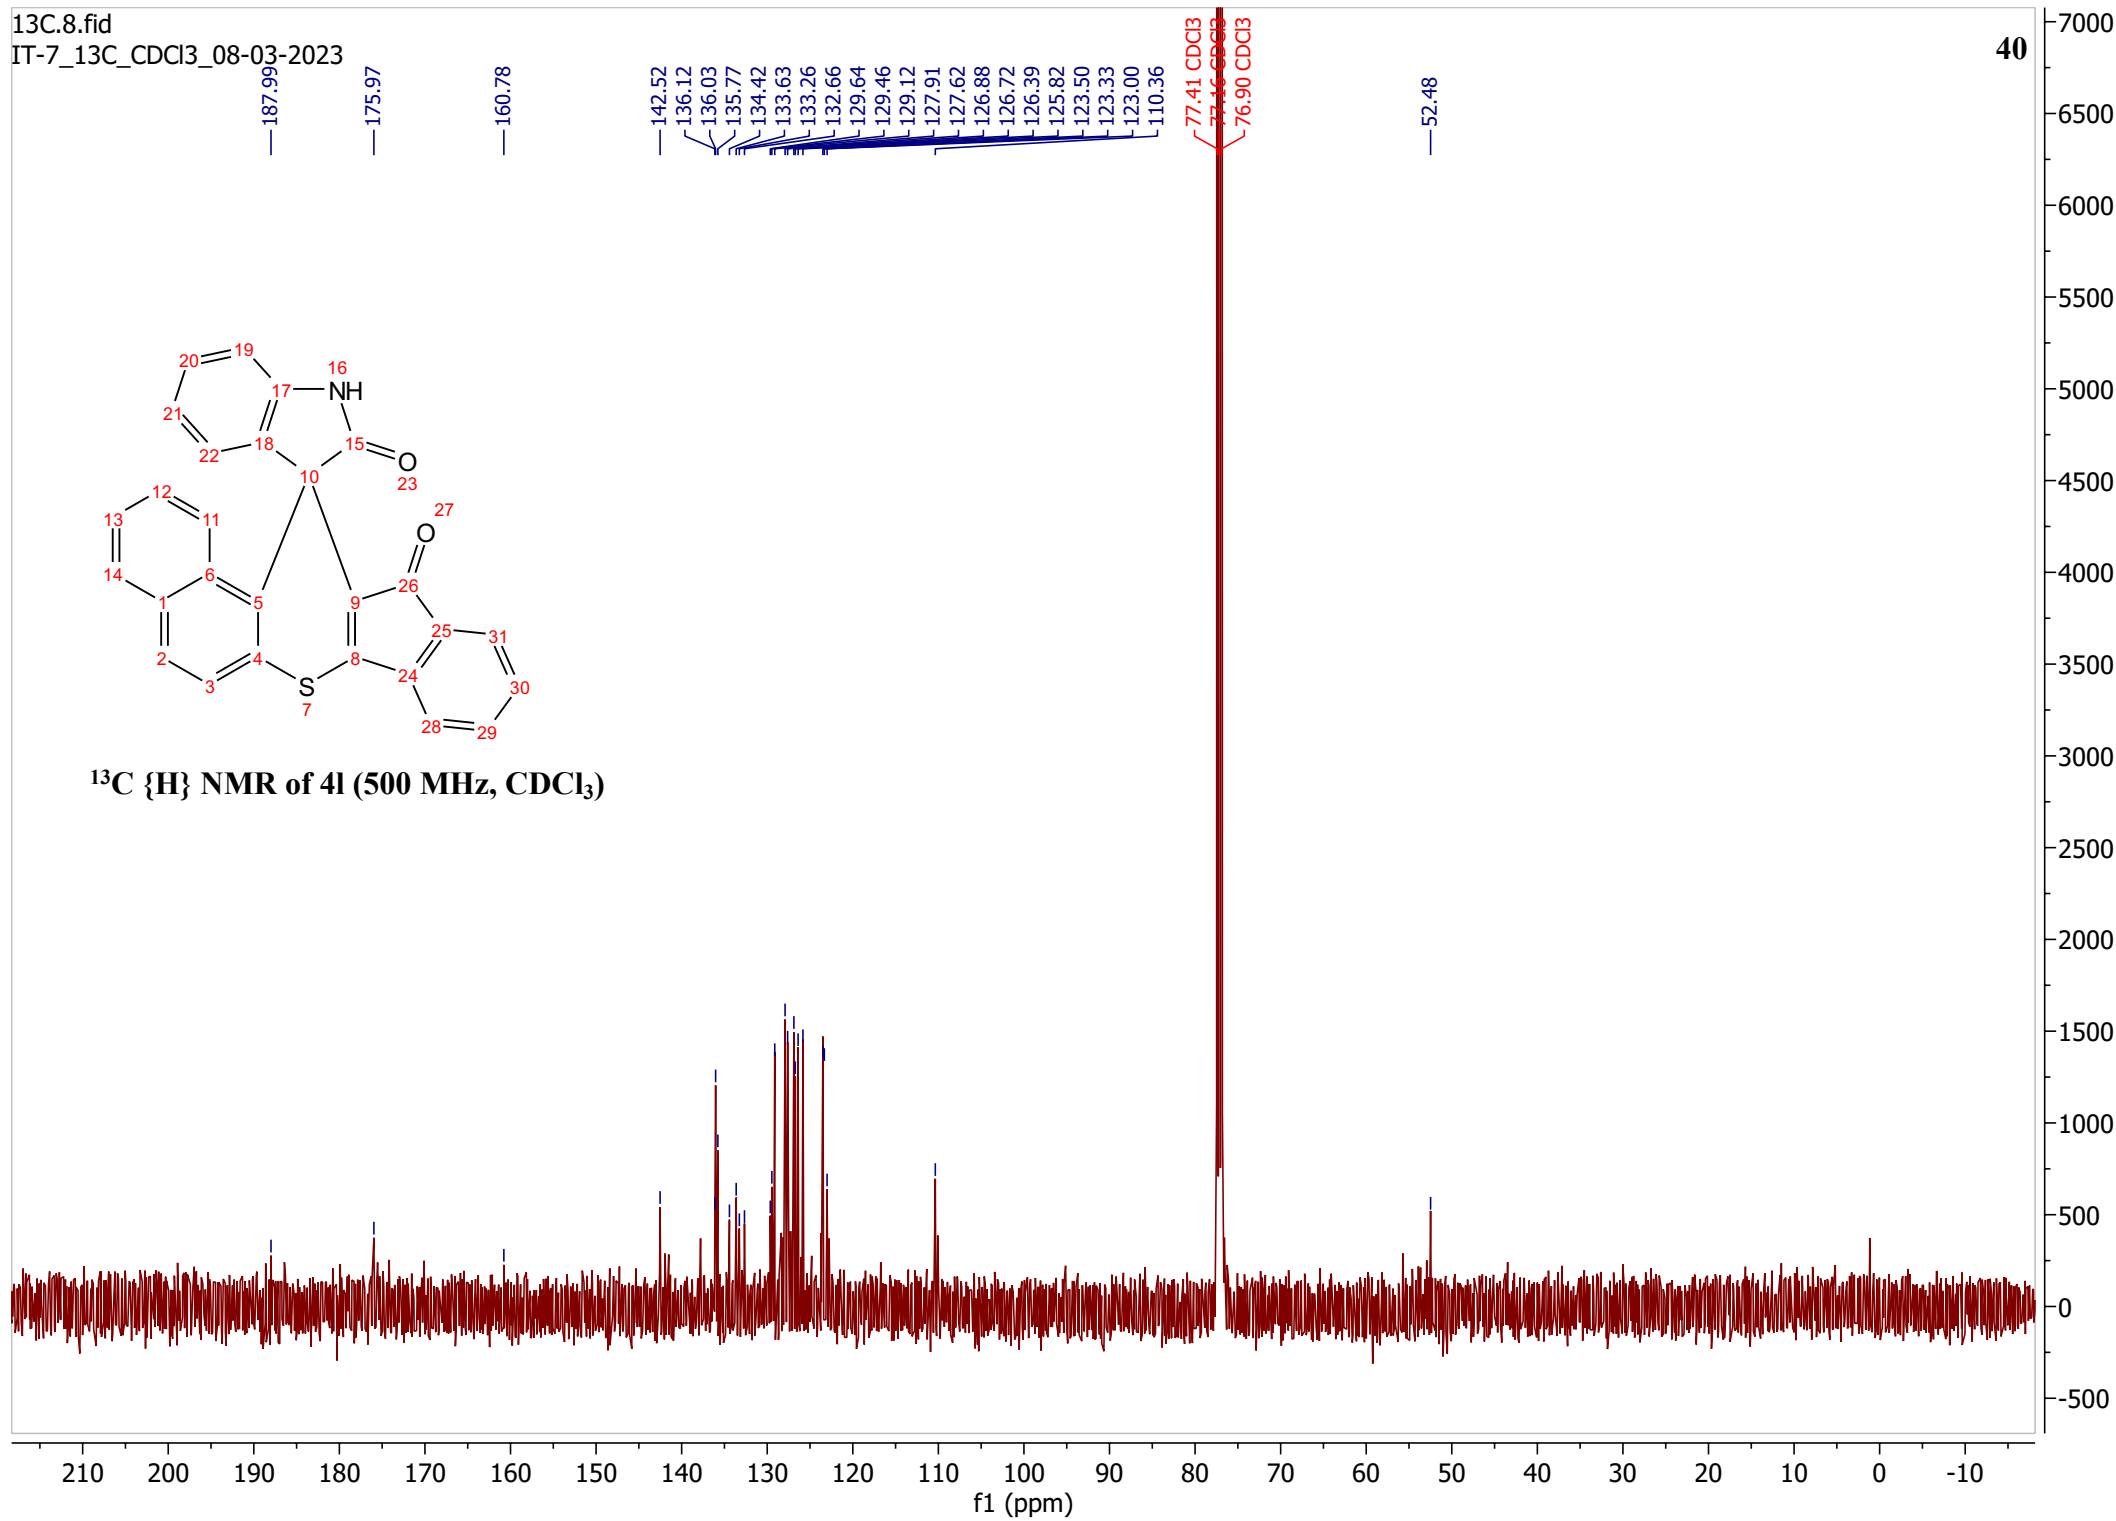

RU-IT-1 43 (0.744) AM (Cen,4, 80.00, Ar,10000.0,0.00,0.00); Cm (43:49)

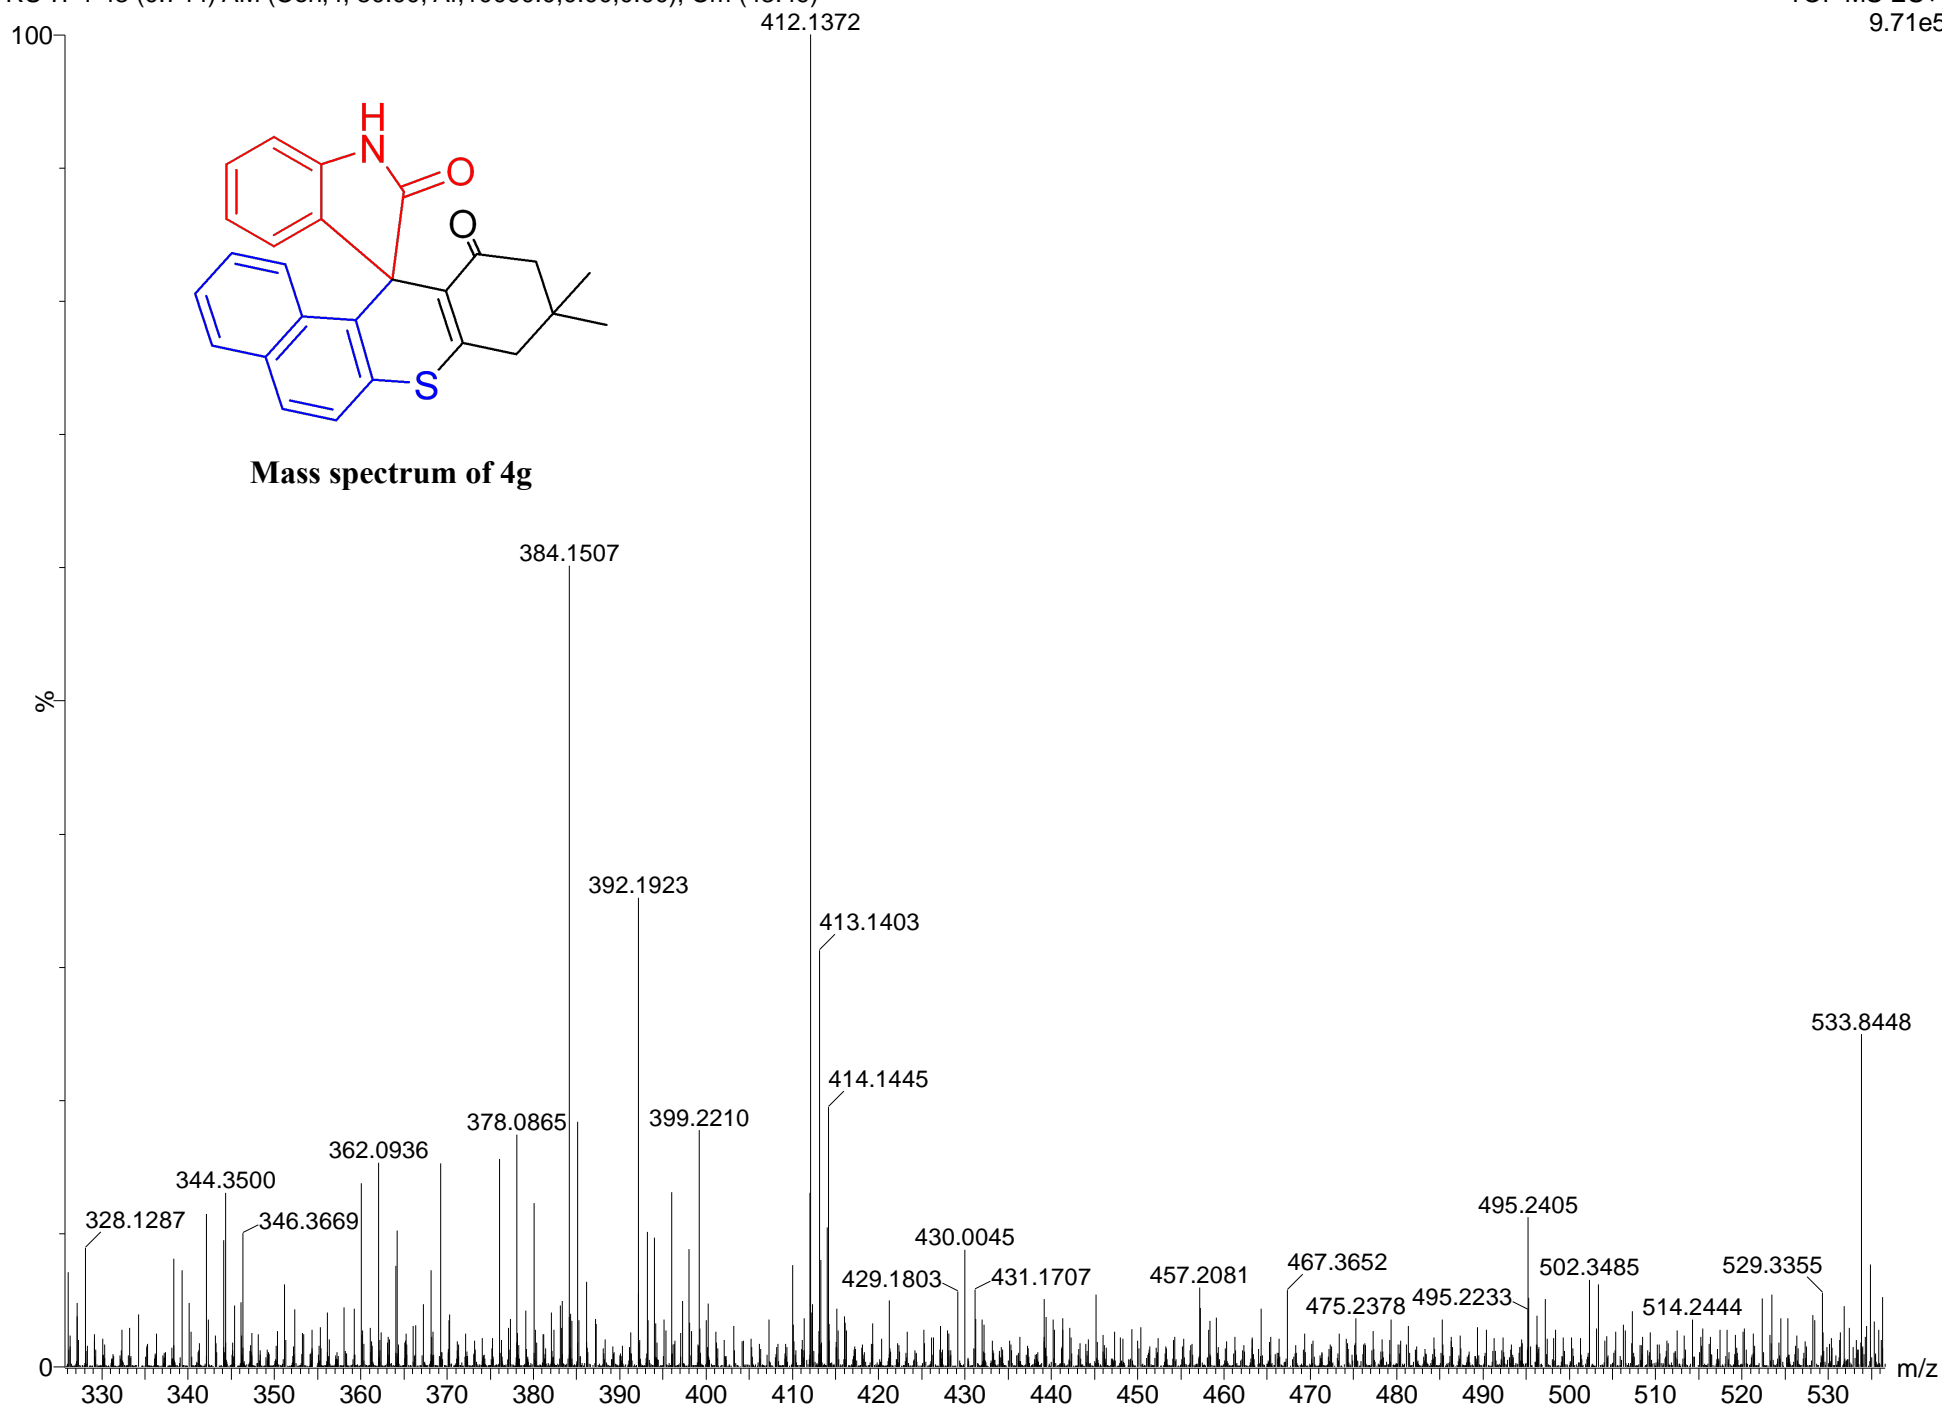

## Single Injection Report

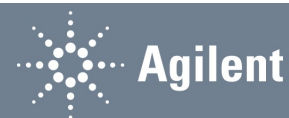

Sequence Acquired Date 2024-10-03 12:34:56+05:30  
 Sample Name 4A  
 Injection Volume 15.000  
 Injection Acq Method Name 03-10-2024.amx  
 Sequence Name SingleSample  
 Sample Vial Number P1-A1

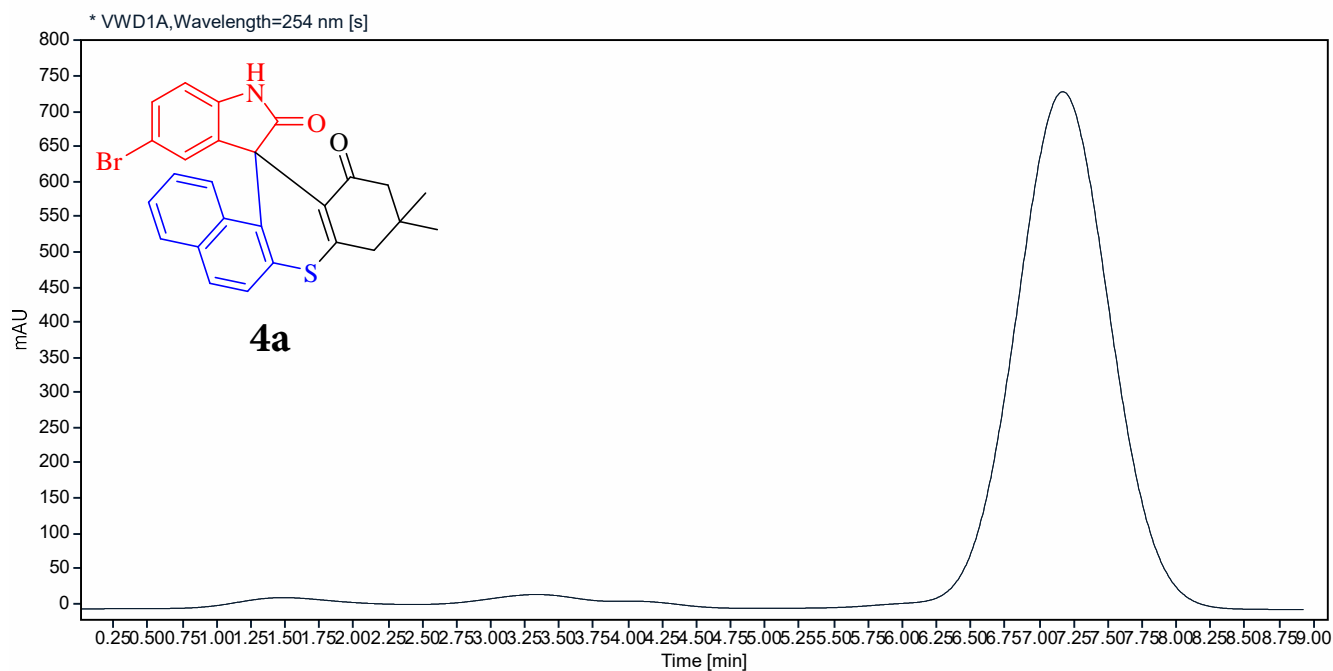

Signal: \* VWD1A,Wavelength=254 nm [s]

| RT [min]   | Type | Width [min] | Area              | Height   | Area%   |
|------------|------|-------------|-------------------|----------|---------|
| 1.478      | MM m | 1.2565      | 440.0839          | 10.9952  | 1.2270  |
| 3.328      | MM m | 1.3831      | 451.3692          | 11.5377  | 1.2584  |
| 7.164      | MM m | 2.3413      | 34976.2459        | 730.8566 | 97.5146 |
| <b>Sum</b> |      |             | <b>35867.6990</b> |          |         |

## Single Injection Report

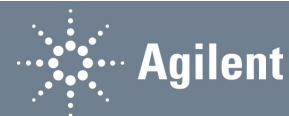

Sequence Acquired Date 2024-10-03 12:45:07+05:30  
 Sample Name 4B  
 Injection Volume 15.000  
 Injection Acq Method Name 03-10-2024.amx  
 Sequence Name SingleSample  
 Sample Vial Number P1-A2

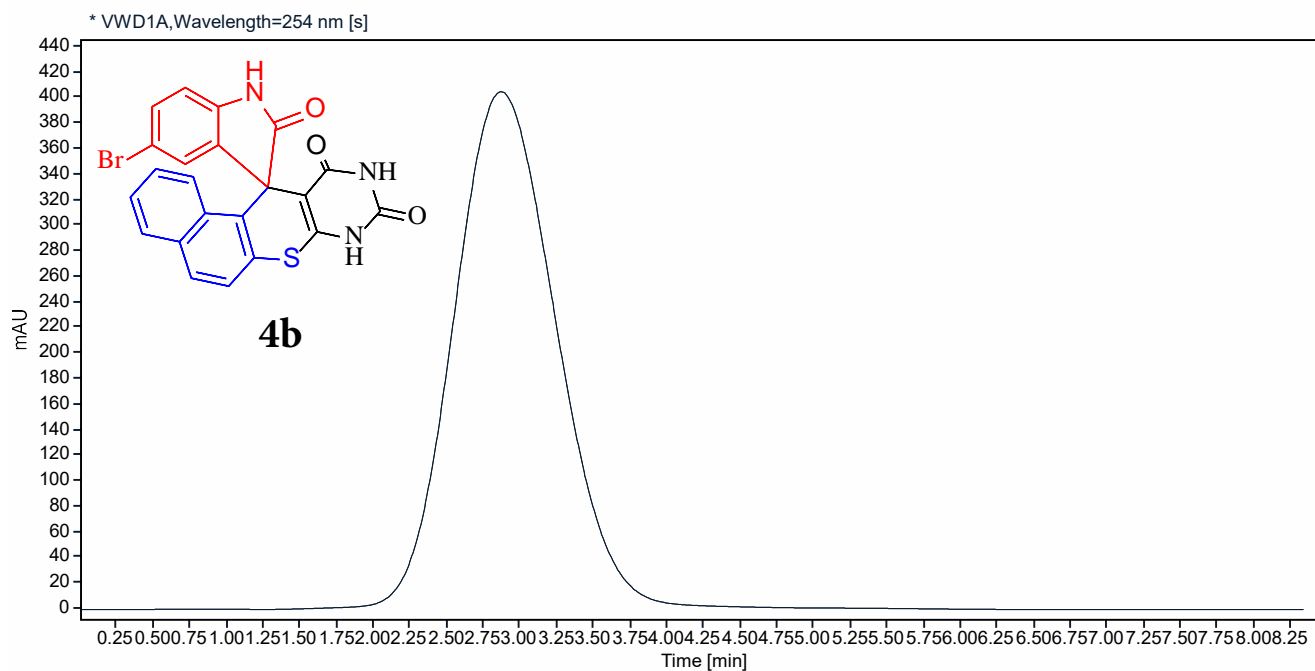

Signal: \* VWD1A,Wavelength=254 nm [s]

| RT [min]   | Type | Width [min] | Area              | Height   | Area%    |
|------------|------|-------------|-------------------|----------|----------|
| 2.867      | MM m | 2.2041      | 19130.0073        | 402.1882 | 100.0000 |
| <b>Sum</b> |      |             | <b>19130.0073</b> |          |          |

## Single Injection Report



Sequence Acquired Date 2024-10-03 12:55:46+05:30  
 Sample Name 4C  
 Injection Volume 15.000  
 Injection Acq Method Name 03-10-2024.amx  
 Sequence Name SingleSample  
 Sample Vial Number P1-A3

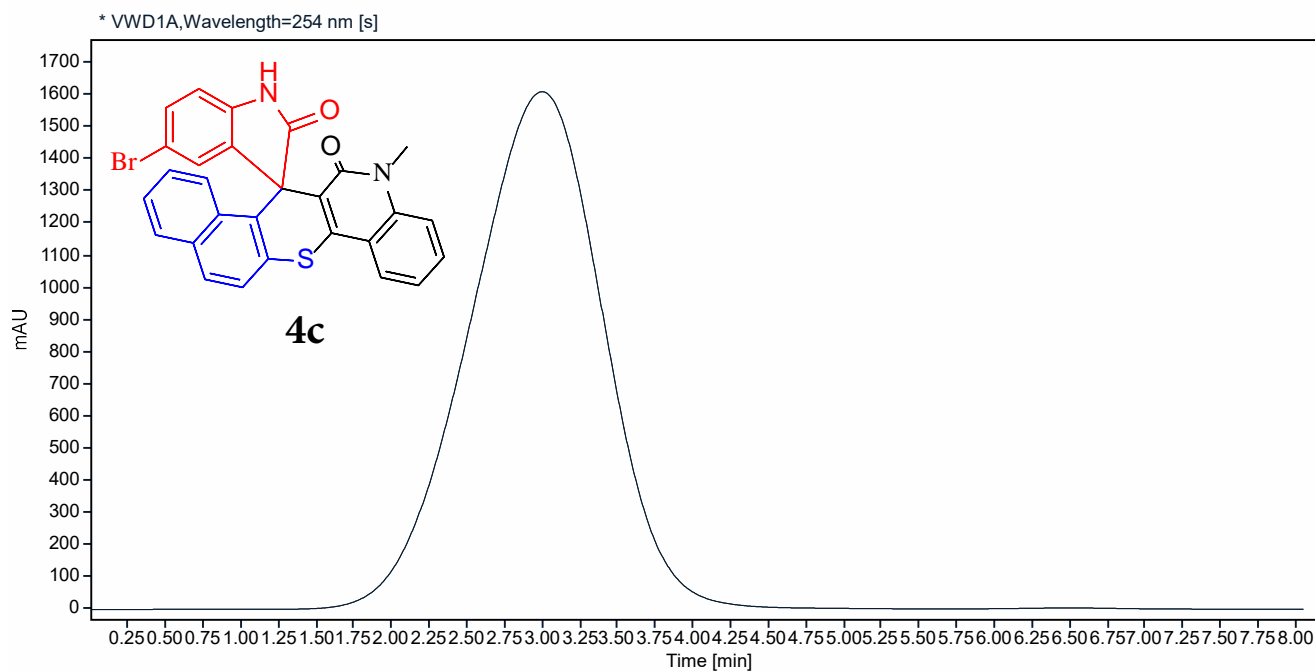

Signal: \* VWD1A,Wavelength=254 nm [s]

| RT [min]   | Type | Width [min] | Area              | Height    | Area%    |
|------------|------|-------------|-------------------|-----------|----------|
| 2.994      | MM m | 2.5789      | 96522.6799        | 1596.1788 | 100.0000 |
| <b>Sum</b> |      |             | <b>96522.6799</b> |           |          |



## Single Injection Report



Sequence Acquired Date 2024-10-03 13:08:19+05:30  
 Sample Name 4D  
 Injection Volume 15.000  
 Injection Acq Method Name 03-10-2024.amx  
 Sequence Name SingleSample  
 Sample Vial Number P1-A4

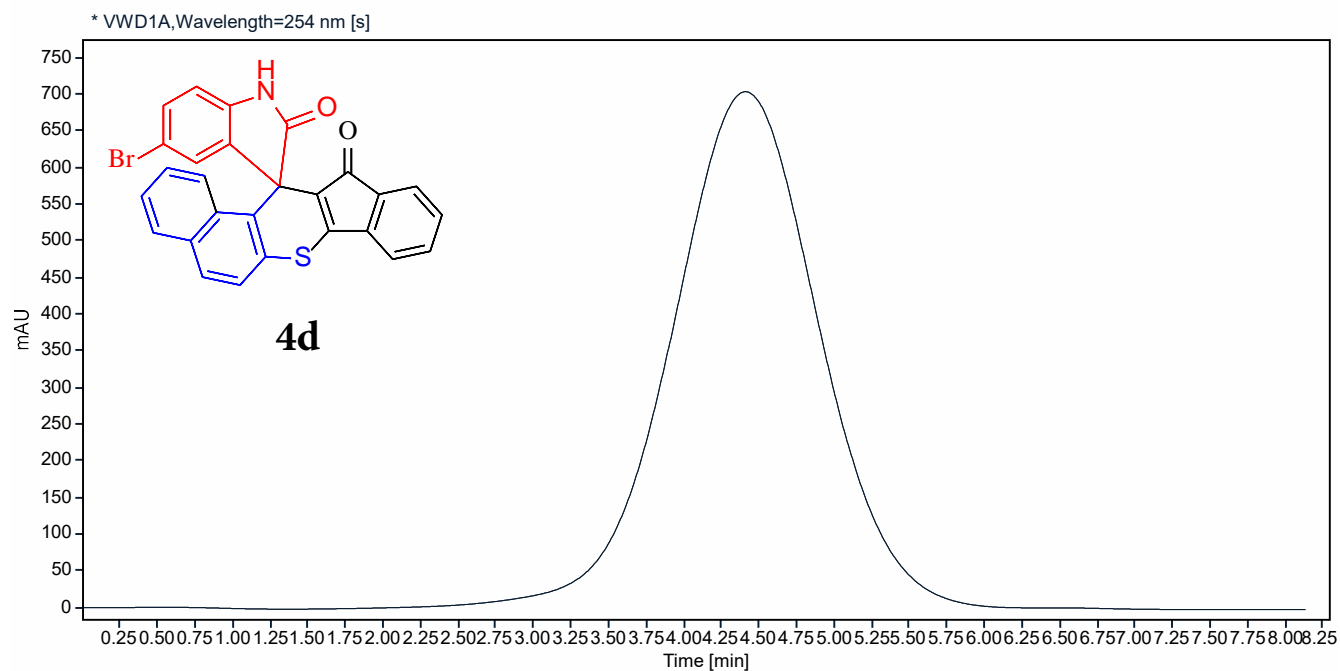

Signal: \* VWD1A,Wavelength=254 nm [s]

| RT [min]   | Type | Width [min] | Area              | Height   | Area%    |
|------------|------|-------------|-------------------|----------|----------|
| 4.405      | MM m | 3.2144      | 46283.2595        | 696.9527 | 100.0000 |
| <b>Sum</b> |      |             | <b>46283.2595</b> |          |          |

## Single Injection Report



Sequence Acquired Date 2024-10-03 13:19:57+05:30  
 Sample Name 4E  
 Injection Volume 15.000  
 Injection Acq Method Name 03-10-2024.amx  
 Sequence Name SingleSample  
 Sample Vial Number P1-A5

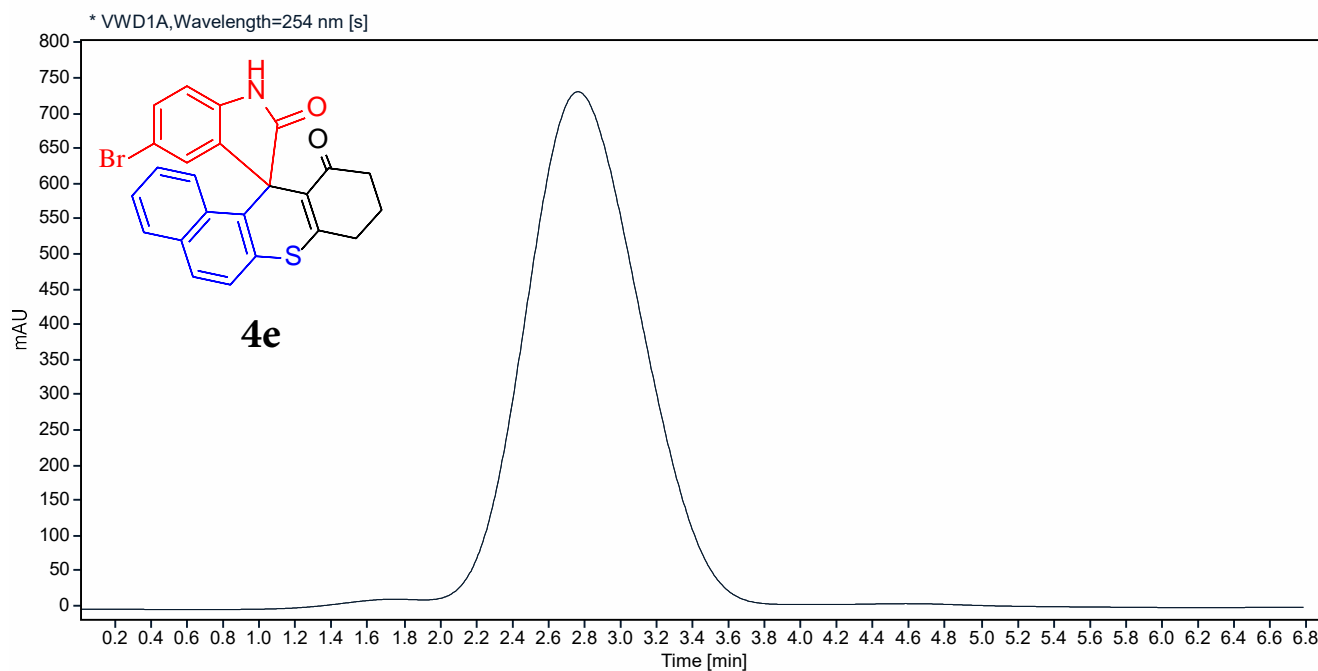

Signal: \* VWD1A,Wavelength=254 nm [s]

| RT [min]   | Type | Width [min] | Area              | Height   | Area%   |
|------------|------|-------------|-------------------|----------|---------|
| 1.745      | MM m | 0.6753      | 74.0004           | 2.7842   | 0.2350  |
| 2.759      | MM m | 1.7449      | 31330.3940        | 721.8420 | 99.5137 |
| 4.575      | MM m | 1.2981      | 79.1187           | 2.3323   | 0.2513  |
| <b>Sum</b> |      |             | <b>31483.5131</b> |          |         |

## Single Injection Report



Sequence Acquired Date 2024-10-03 13:29:33+05:30  
 Sample Name 4F.  
 Injection Volume 15.000  
 Injection Acq Method Name 03-10-2024.amx  
 Sequence Name SingleSample  
 Sample Vial Number P1-A6

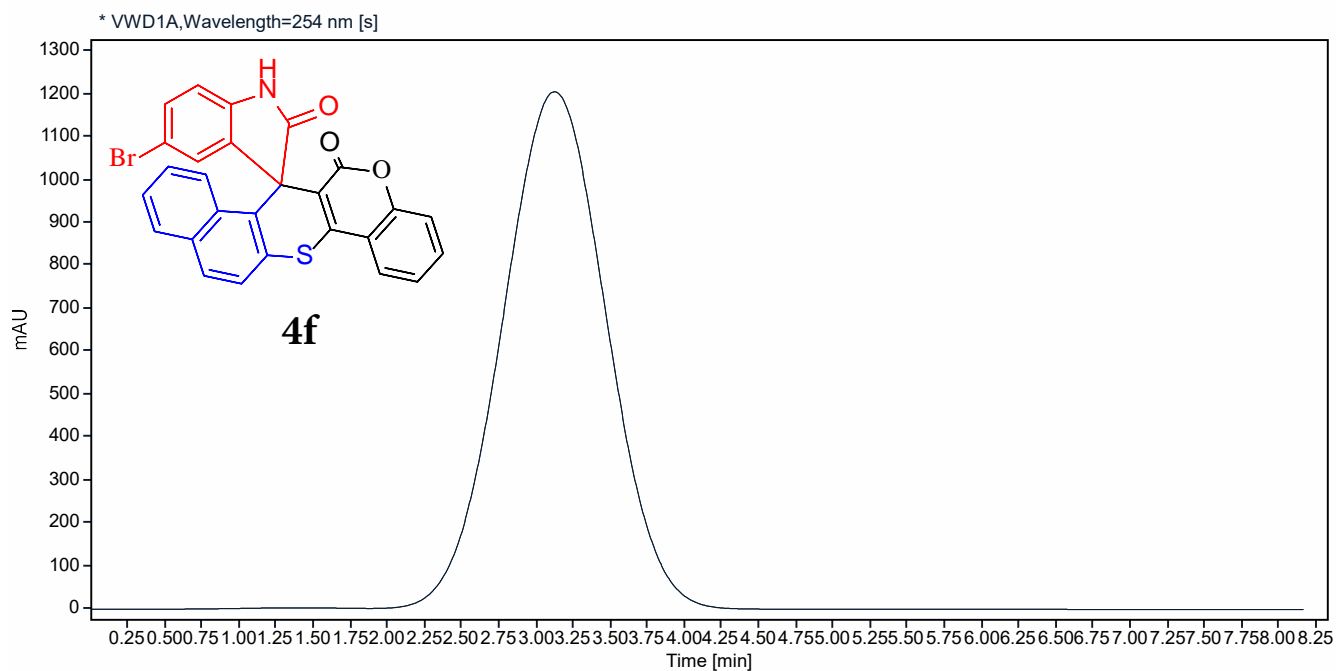

Signal: \* VWD1A,Wavelength=254 nm [s]

| RT [min]   | Type | Width [min] | Area              | Height    | Area%    |
|------------|------|-------------|-------------------|-----------|----------|
| 3.120      | MM m | 2.1103      | 57799.5557        | 1200.4883 | 100.0000 |
| <b>Sum</b> |      |             | <b>57799.5557</b> |           |          |

## Single Injection Report



Sequence Acquired Date 2024-10-03 13:38:30+05:30  
 Sample Name 4G  
 Injection Volume 15.000  
 Injection Acq Method Name 03-10-2024.amx  
 Sequence Name SingleSample  
 Sample Vial Number P1-A7

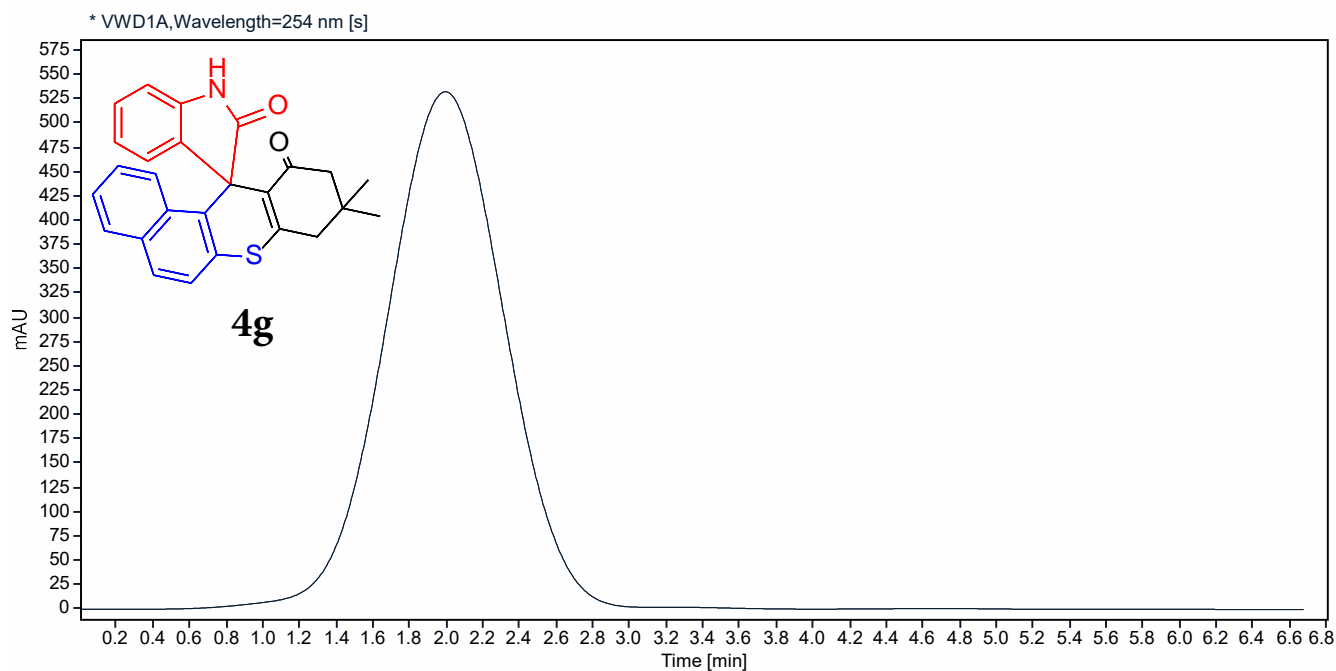

Signal: \* VWD1A,Wavelength=254 nm [s]

| RT [min]   | Type | Width [min] | Area              | Height   | Area%    |
|------------|------|-------------|-------------------|----------|----------|
| 1.991      | MM m | 1.9202      | 23109.4087        | 527.1856 | 100.0000 |
| <b>Sum</b> |      |             | <b>23109.4087</b> |          |          |

## Single Injection Report



Sequence Acquired Date 2024-10-03 13:47:22+05:30  
 Sample Name 4H  
 Injection Volume 15.000  
 Injection Acq Method Name 03-10-2024.amx  
 Sequence Name SingleSample  
 Sample Vial Number P1-A8

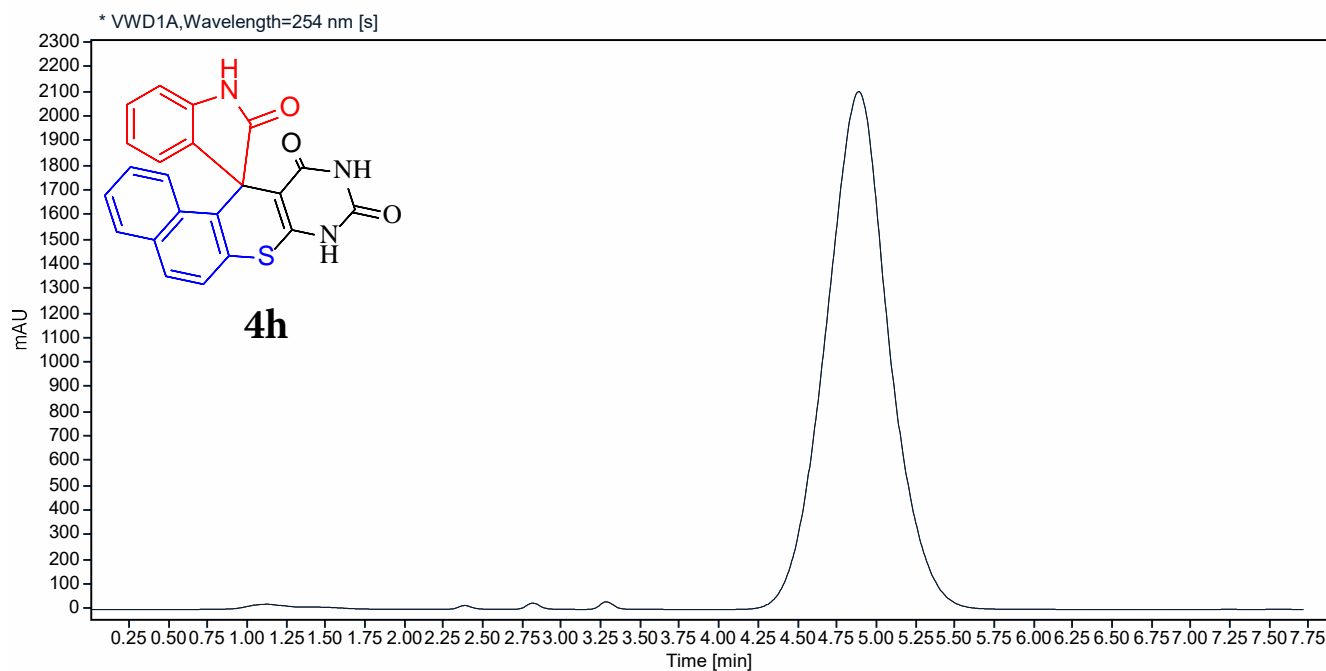

Signal: \* VWD1A,Wavelength=254 nm [s]

| RT [min]   | Type | Width [min] | Area              | Height    | Area%   |
|------------|------|-------------|-------------------|-----------|---------|
| 2.380      | MM m | 0.1601      | 65.9579           | 13.2093   | 0.1123  |
| 2.812      | MM m | 0.1819      | 124.2314          | 23.0790   | 0.2116  |
| 3.279      | MM m | 0.2220      | 170.6674          | 29.6818   | 0.2906  |
| 4.876      | MM m | 2.2354      | 58358.5572        | 1201.3952 | 99.3855 |
| <b>Sum</b> |      |             | <b>58719.4140</b> |           |         |

## Single Injection Report



Sequence Acquired Date 2024-10-03 13:58:00+05:30  
Sample Name 4i  
Injection Volume 15.000  
Injection Acq Method Name 03-10-2024.amx  
Sequence Name SingleSample  
Sample Vial Number P1-A9

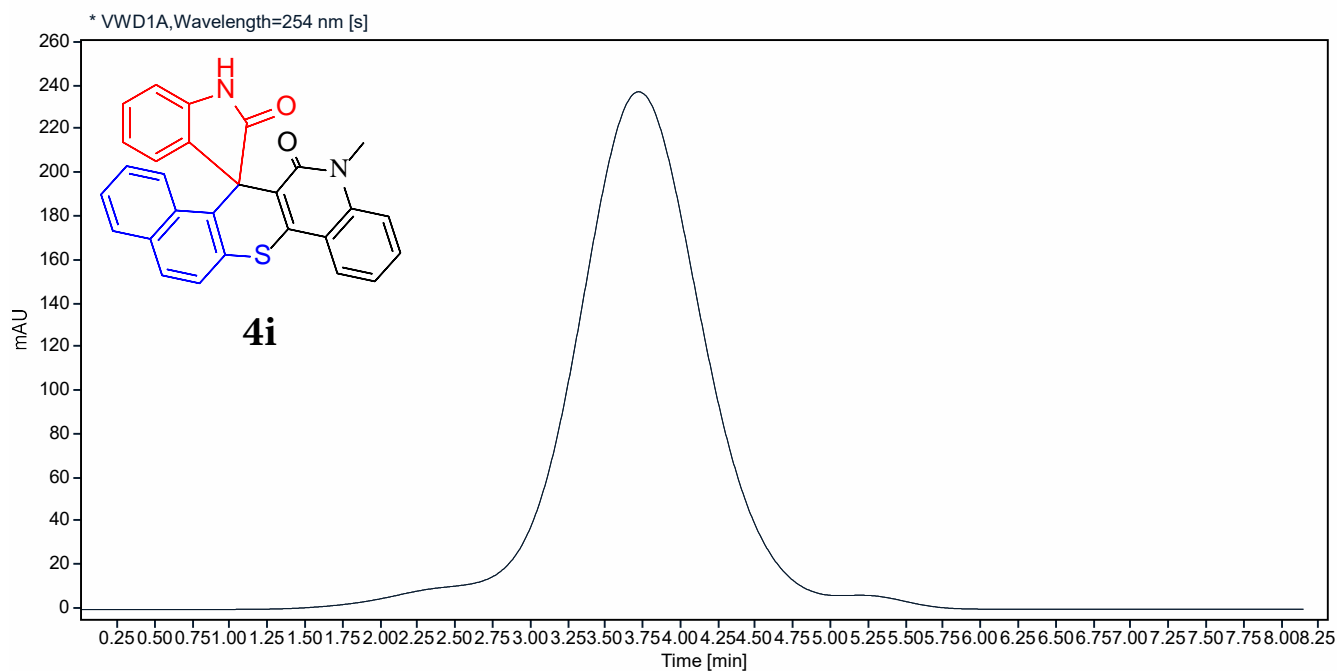

Signal: \* VWD1A, Wavelength=254 nm [s]

| RT [min]   | Type | Width [min] | Area              | Height   | Area%    |
|------------|------|-------------|-------------------|----------|----------|
| 3.716      | MM m | 2.4849      | 12594.5137        | 228.7684 | 100.0000 |
| <b>Sum</b> |      |             | <b>12594.5137</b> |          |          |

## Single Injection Report



Sequence Acquired Date 2024-10-03 14:11:11+05:30  
 Sample Name 4J  
 Injection Volume 15.000  
 Injection Acq Method Name 03-10-2024.amx  
 Sequence Name SingleSample  
 Sample Vial Number P1-A10

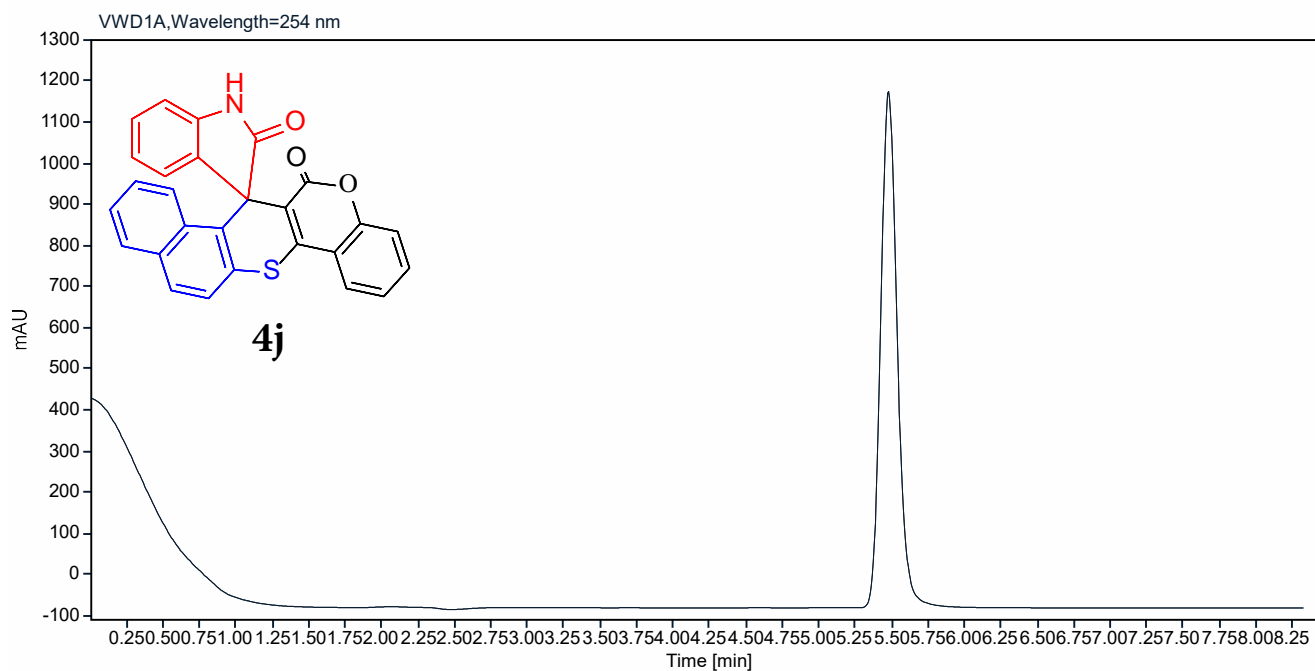

Signal: VWD1A,Wavelength=254 nm

| RT [min]   | Type | Width [min] | Area             | Height    | Area%    |
|------------|------|-------------|------------------|-----------|----------|
| 5.472      | MM m | 0.5147      | 9725.1919        | 1248.5674 | 100.0000 |
| <b>Sum</b> |      |             | <b>9725.1919</b> |           |          |

## Single Injection Report



Sequence Acquired Date 2024-10-03 14:23:44+05:30  
 Sample Name 4K  
 Injection Volume 15.000  
 Injection Acq Method Name 03-10-2024.amx  
 Sequence Name SingleSample  
 Sample Vial Number P1-A11

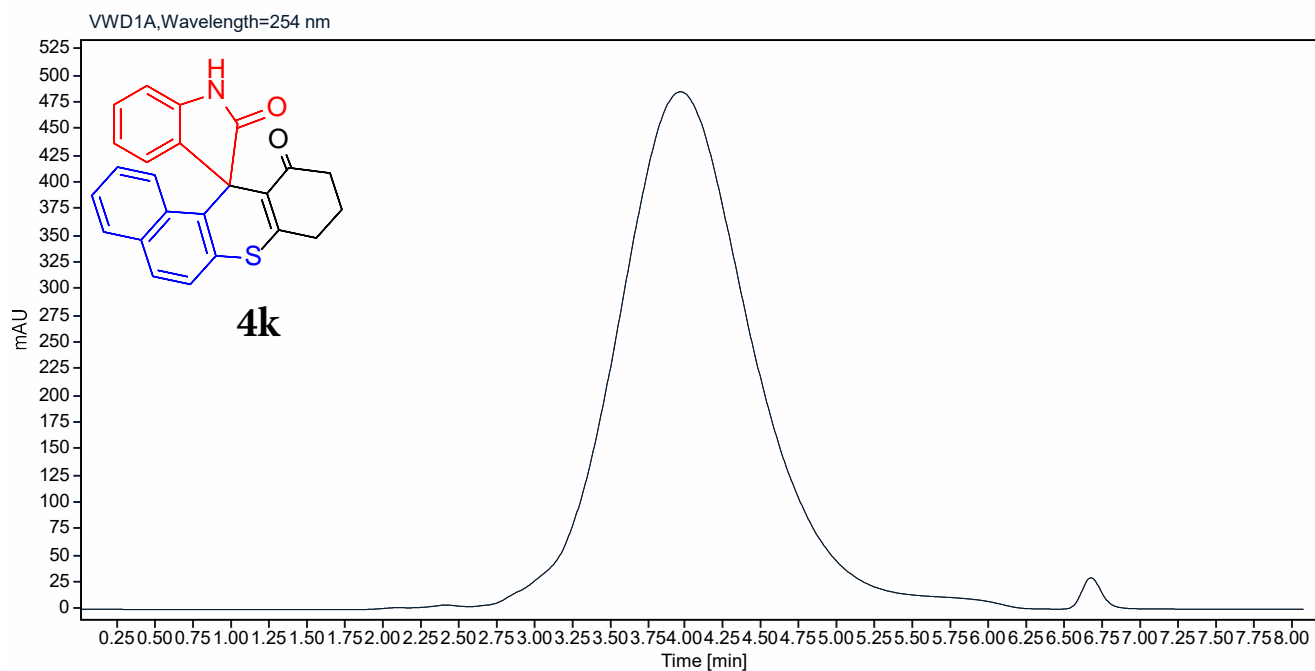

Signal: VWD1A,Wavelength=254 nm

| RT [min]   | Type | Width [min] | Area              | Height   | Area%   |
|------------|------|-------------|-------------------|----------|---------|
| 3.960      | MM m | 2.4462      | 27334.2916        | 470.4968 | 99.0386 |
| 6.669      | MM m | 0.4581      | 265.3455          | 29.1157  | 0.9614  |
| <b>Sum</b> |      |             | <b>27599.6371</b> |          |         |



## Single Injection Report



Sequence Acquired Date 2024-10-03 14:32:27+05:30  
 Sample Name 4L  
 Injection Volume 15.000  
 Injection Acq Method Name 03-10-2024.amx  
 Sequence Name SingleSample  
 Sample Vial Number P1-B1

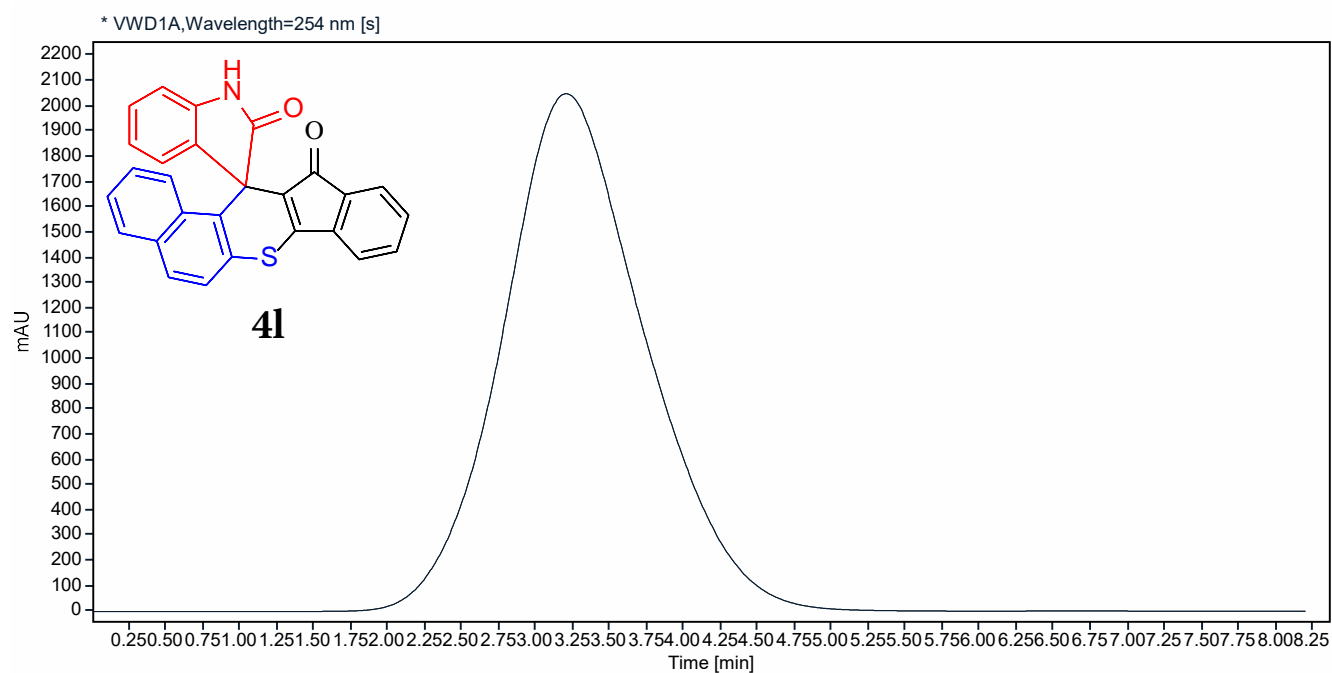

Signal: \* VWD1A,Wavelength=254 nm [s]

| RT [min]   | Type | Width [min] | Area               | Height    | Area%    |
|------------|------|-------------|--------------------|-----------|----------|
| 3.203      | MM m | 2.9416      | 134201.3558        | 2036.1647 | 100.0000 |
| <b>Sum</b> |      |             | <b>134201.3558</b> |           |          |

## References

- 1 Chandra, S.; Chatterjee, P.; Dey, P.; Bhattacharya, S. Evaluation of in Vitro Anti-Inflammatory Activity of Coffee against the Denaturation of Protein. *Asian Pac. J. Trop. Biomed*, **2012**, 2 (1, Supplement), 178–S180.
- 2 Dallakyan, S.; Olson, A. J. Small-molecule library screening by docking with PyRx. *Methods Mol Biol*, **2015**; 1263, 243-50.
- 3 Rimon, G.; Sidhu, R.S.; Lauver, D.A.; Lee, J.Y.; Sharma, N.P.; Yuan, C.; Frieler, R.A.; Trievel, R.C.; Lucchesi, B.R.; Smith, W.L. Coxibs interfere with the action of aspirin by binding tightly to one monomer of cyclooxygenase-1, *Proc Natl Acad Sci USA*, **2010**; 107, 28-33.
- 4 Orlando, B.J.; Malkowski, M.G. Crystal structure of Rofecoxib bound to human cyclooxygenase-2, *Acta Crystallogr F Struct Biol Commun*, **2016**; 72, 772-776.
- 5 Pettersen, E. F.; Goddard, T. D.; Huang, C. C.; Meng, E. C.; Couch, G. S.; Croll, T. I.; Morris, J. H.; Ferrin, T. E.; UCSF ChimeraX: Structure visualization for researchers, educators, and developers, *Protein Sci*, **2021**; 30(1), 70-82.
- 6 Daina, A.; Michielin, O.; Zoete, V. Swiss ADME: a free web tool to evaluate pharmacokinetics, drug likeness and medicinal chemistry friendliness of small molecules, *Sci rep*, **2017**; 7, 42717.
- 7 Douglas, E. V. P.; Blundell, T. L.; Ascher, D. B. pkCSM: predicting small-molecule pharmacokinetic properties using graph-based signatures, *J Med Chem*, **2015**; 58 (9), 4066–4072.
